# Supplementary material
Source: publisher site journal article supplement (https://www.dovepress.com/get_supplementary_file.php?f=354824.xlsx)
Supplement: Supplementary file 1 [file get_supplementary_file.php]

## Sheet: Sheet1
Supplementary materials
Supplementary Table 1 Detailed information of 65 genes.
#node	identifier	x_position	y_position	color	annotation
Ambra1	10090.ENSMUSP00000049258	0.424558	0.390443	rgb(239,135,117)	Activating molecule in BECN1-regulated autophagy protein 1; Regulates autophagy and development of the nervous system. Involved in autophagy in controlling protein turnover during neuronal development, and in regulating normal cell survival and proliferation
Atg10	10090.ENSMUSP00000022119	0.27064	0.570624	rgb(0,178,157)	Ubiquitin-like-conjugating enzyme ATG10; E2-like enzyme involved in autophagy. Acts as an E2-like enzyme that catalyzes the conjugation of ATG12 to ATG5. ATG12 conjugation to ATG5 is required for autophagy. Likely serves as an ATG5-recognition molecule. Not involved in ATG12 conjugation to ATG3. Plays a role in adenovirus-mediated cell lysis
Atg101	10090.ENSMUSP00000045474	0.271398	0.662072	rgb(145,239,117)	Autophagy-related protein 101; Autophagy factor required for autophagosome formation. Stabilizes ATG13, protecting it from proteasomal degradation
Atg12	10090.ENSMUSP00000038489	0.484457	0.536217	rgb(255,175,101)	Ubiquitin-like protein ATG12; Ubiquitin-like protein involved in autophagy vesicles formation. Conjugation with ATG5 through a ubiquitin-like conjugating system involving also ATG7 as an E1-like activating enzyme and ATG10 as an E2-like conjugating enzyme, is essential for its function. The ATG12-ATG5 conjugate acts as an E3-like enzyme which is required for lipidation of ATG8 family proteins and…
Atg13	10090.ENSMUSP00000076081	0.282013	0.471026	rgb(239,234,117)	Autophagy-related protein 13; Autophagy factor required for autophagosome formation and mitophagy. Target of the TOR kinase signaling pathway that regulates autophagy through the control of the phosphorylation status of ATG13 and ULK1, and the regulation of the ATG13-ULK1- RB1CC1 complex. Through its regulation of ULK1 activity, plays a role in the regulation of the kinase activity of mTORC1 and …
Atg14	10090.ENSMUSP00000039047	0.356318	0.400402	rgb(150,101,255)	Beclin 1-associated autophagy-related key regulator; Required for both basal and inducible autophagy. Determines the localization of the autophagy-specific PI3-kinase complex PI3KC3-C1 (By similarity). Plays a role in autophagosome formation and MAP1LC3/LC3 conjugation to phosphatidylethanolamine. Promotes BECN1 translocation from the trans-Golgi network to autophagosomes (By similarity). Enhance…
Atg16l1	10090.ENSMUSP00000027512	0.463227	0.691952	rgb(101,199,255)	Autophagy-related protein 16-1; Plays an essential role in autophagy: interacts with ATG12-ATG5 to mediate the conjugation of phosphatidylethanolamine (PE) to LC3 (MAP1LC3A, MAP1LC3B or MAP1LC3C), to produce a membrane-bound activated form of LC3 named LC3-II. Thereby, controls the elongation of the nascent autophagosomal membrane. Regulates mitochondrial antiviral signaling (MAVS)-dependent type…
Atg3	10090.ENSMUSP00000023343	0.40257	0.475553	rgb(14,178,0)	Ubiquitin-like-conjugating enzyme ATG3; E2 conjugating enzyme required for the cytoplasm to vacuole transport (Cvt), autophagy, and mitochondrial homeostasis. Responsible for the E2-like covalent binding of phosphatidylethanolamine to the C-terminal Gly of ATG8-like proteins (GABARAP, GABARAPL1, GABARAPL2 or MAP1LC3A). The ATG12- ATG5 conjugate plays a role of an E3 and promotes the transfer of A…
Atg4a	10090.ENSMUSP00000108595	0.396504	0.772535	rgb(117,239,179)	Autophagy related 4a, cysteine peptidase; Cysteine protease ATG4A; Cysteine protease required for the cytoplasm to vacuole transport (Cvt) and autophagy. Cleaves the C-terminal amino acid of ATG8 family proteins to reveal a C-terminal glycine. Exposure of the glycine at the C-terminus is essential for ATG8 proteins conjugation to phosphatidylethanolamine (PE) and insertion to membranes, which is …
Atg4b	10090.ENSMUSP00000027502	0.224389	0.569718	rgb(239,225,117)	Autophagy related 4b, cysteine peptidase; Cysteine protease ATG4B; Cysteine protease required for the cytoplasm to vacuole transport (Cvt) and autophagy. Cleaves the C-terminal amino acid of ATG8 family proteins MAP1LC3, GABARAPL1, GABARAPL2 and GABARAP, to reveal a C-terminal glycine. Exposure of the glycine at the C- terminus is essential for ATG8 proteins conjugation to phosphatidylethanolamin…
Atg4c	10090.ENSMUSP00000030279	0.361626	0.739034	rgb(117,239,234)	Cysteine protease ATG4C; Cysteine protease required for the cytoplasm to vacuole transport (Cvt) and autophagy. Cleaves the C-terminal amino acid of ATG8 family proteins MAP1LC3 and GABARAPL2, to reveal a C- terminal glycine. Exposure of the glycine at the C-terminus is essential for ATG8 proteins conjugation to phosphatidylethanolamine (PE) and insertion to membranes, which is necessary for auto…
Atg4d	10090.ENSMUSP00000068450	0.417734	0.758048	rgb(117,239,225)	Autophagy related 4d, cysteine peptidase; Cysteine protease ATG4D; Cysteine protease ATG4D: Cysteine protease required for the cytoplasm to vacuole transport (Cvt) and autophagy. Cleaves the C-terminal amino acid of ATG8 family proteins MAP1LC3 and GABARAPL2, to reveal a C-terminal glycine. Exposure of the glycine at the C-terminus is essential for ATG8 proteins conjugation to phosphatidylethanol…
Atg5	10090.ENSMUSP00000044769	0.505687	0.485513	rgb(239,117,117)	Autophagy-related protein 5; Autophagy protein 5; Involved in autophagic vesicle formation. Conjugation with ATG12, through a ubiquitin-like conjugating system involving ATG7 as an E1-like activating enzyme and ATG10 as an E2-like conjugating enzyme, is essential for its function. The ATG12-ATG5 conjugate acts as an E3-like enzyme which is required for lipidation of ATG8 family proteins and their…
Atg7	10090.ENSMUSP00000032457	0.458677	0.435714	rgb(0,28,178)	Ubiquitin-like modifier-activating enzyme ATG7; E1-like activating enzyme involved in the 2 ubiquitin- like systems required for cytoplasm to vacuole transport (Cvt) and autophagy. Activates ATG12 for its conjugation with ATG5 as well as the ATG8 family proteins for their conjugation with phosphatidylethanolamine. Both systems are needed for the ATG8 association to Cvt vesicles and autophagosomes…
Atg9a	10090.ENSMUSP00000139608	0.441238	0.592354	rgb(163,239,117)	Autophagy-related protein 9; Involved in autophagy and cytoplasm to vacuole transport (Cvt) vesicle formation. Plays a key role in the organization of the preautophagosomal structure/phagophore assembly site (PAS), the nucleating site for formation of the sequestering vesicle. Cycles between a juxta-nuclear trans-Golgi network compartment and late endosomes. Nutrient starvation induces accumulati…
Atg9b	10090.ENSMUSP00000051864	0.30476	0.697384	rgb(117,236,239)	Autophagy-related protein 9B; Involved in autophagy and cytoplasm to vacuole transport (Cvt) vesicle formation. Plays a key role in the organization of the preautophagosomal structure/phagophore assembly site (PAS), the nucleating site for formation of the sequestering vesicle
Atxn3	10090.ENSMUSP00000021606	0.405602	0.0970825	rgb(117,239,188)	Ataxin-3; Deubiquitinating enzyme involved in protein homeostasis maintenance, transcription, cytoskeleton regulation, myogenesis and degradation of misfolded chaperone substrates (By similarity). Binds long polyubiquitin chains and trims them, while it has weak or no activity against chains of 4 or less ubiquitins (By similarity). Involved in degradation of misfolded chaperone substrates via its…
Bad	10090.ENSMUSP00000025910	0.728602	0.0952716	rgb(255,255,255)	Bcl2-associated agonist of cell death; Promotes cell death. Successfully competes for the binding to Bcl-X(L), Bcl-2 and Bcl-W, thereby affecting the level of heterodimerization of these proteins with BAX. Can reverse the death repressor activity of Bcl-X(L), but not that of Bcl-2. Appears to act as a link between growth factor receptor signaling and the apoptotic pathways
Bcl2	10090.ENSMUSP00000108371	0.64444	0.168612	rgb(239,153,117)	B cell leukemia/lymphoma 2; Apoptosis regulator Bcl-2; Suppresses apoptosis in a variety of cell systems including factor-dependent lymphohematopoietic and neural cells. Regulates cell death by controlling the mitochondrial membrane permeability. Appears to function in a feedback loop system with caspases. Inhibits caspase activity either by preventing the release of cytochrome c from the mitocho…
Bcl2l1	10090.ENSMUSP00000007803	0.574684	0.254628	rgb(101,255,163)	Bcl-2-like 1 (apoptosis regulator Bcl-X); Bcl-2-like protein 1; Potent inhibitor of cell death. Inhibits activation of caspases. Appears to regulate cell death by blocking the voltage- dependent anion channel (VDAC) by binding to it and preventing the release of the caspase activator, CYC1, from the mitochondrial membrane. Also acts as a regulator of G2 checkpoint and progression to cytokinesis d…
Bcl2l11	10090.ENSMUSP00000105970	0.696757	0.18672	rgb(117,209,239)	BCL2-like 11 (apoptosis facilitator); Bcl-2-like protein 11; Induces apoptosis and anoikis. The isoforms vary in cytotoxicity with isoform BimS being the most potent and isoform BimEL being the least potent; Belongs to the Bcl-2 family
Becn1	10090.ENSMUSP00000119369	0.514785	0.435714	rgb(187,255,101)	Beclin-1; Plays a central role in autophagy. Acts as core subunit of different PI3K complex forms that mediate formation of phosphatidylinositol 3-phosphate and are believed to play a role in multiple membrane trafficking pathways: PI3KC3-C1 is involved in initiation of autophagosomes and PI3KC3-C2 in maturation of autophagosomes and endocytosis. Involved in regulation of degradative endocytic tr…
Cd40	10090.ENSMUSP00000017799	0.796083	0.365996	rgb(255,255,255)	Tumor necrosis factor receptor superfamily member 5; Receptor for TNFSF5/CD40LG. Transduces TRAF6- and MAP3K8-mediated signals that activate ERK in macrophages and B cells, leading to induction of immunoglobulin secretion
Cflar	10090.ENSMUSP00000109952	0.744524	0.286318	rgb(190,239,117)	CASP8 and FADD-like apoptosis regulator; Apoptosis regulator protein which may function as a crucial link between cell survival and cell death pathways in mammalian cells. Acts as an inhibitor of TNFRSF6 mediated apoptosis. A proteolytic fragment (p43) is likely retained in the death-inducing signaling complex (DISC) thereby blocking further recruitment and processing of caspase-8 at the complex.…
Ddx58	10090.ENSMUSP00000042433	0.763479	0.64668	rgb(199,239,117)	Probable ATP-dependent RNA helicase DDX58; Innate immune receptor which acts as a cytoplasmic sensor of viral nucleic acids and plays a major role in sensing viral infection and in the activation of a cascade of antiviral responses including the induction of type I interferons and proinflammatory cytokines. Its ligands include: 5'- triphosphorylated ssRNA and dsRNA and short dsRNA (<1 kb in lengt…
Gabarap	10090.ENSMUSP00000018711	0.341912	0.560664	rgb(217,239,117)	Gamma-aminobutyric acid receptor-associated protein; Ubiquitin-like modifier that plays a role in intracellular transport of GABA(A) receptors and its interaction with the cytoskeleton. Involved in apoptosis. Involved in autophagy. Whereas LC3s are involved in elongation of the phagophore membrane, the GABARAP/GATE-16 subfamily is essential for a later stage in autophagosome maturation (By simila…
Gabarapl1	10090.ENSMUSP00000032264	0.501137	0.628571	rgb(118,239,117)	Gamma-aminobutyric acid receptor-associated protein-like 1; Ubiquitin-like modifier that increases cell-surface expression of kappa-type opioid receptor through facilitating anterograde intracellular trafficking of the receptor. Involved in formation of autophagosomal vacuoles. Whereas LC3s are involved in elongation of the phagophore membrane, the GABARAP/GATE-16 subfamily is essential for a lat…
Gabarapl2	10090.ENSMUSP00000034428	0.387405	0.64668	rgb(255,0,0)	Gamma-aminobutyric acid receptor-associated protein-like 2; Ubiquitin-like modifier involved in intra-Golgi traffic. Modulates intra-Golgi transport through coupling between NSF activity and SNAREs activation. It first stimulates the ATPase activity of NSF which in turn stimulates the association with GOSR1 (By similarity). Involved in autophagy. Plays a role in mitophagy which contributes to reg…
Glipr2	10090.ENSMUSP00000030202	0.588332	0.909256	rgb(117,218,239)	Golgi-associated plant pathogenesis-related protein 1; GLI pathogenesis-related 2; Belongs to the CRISP family
Hmgb1	10090.ENSMUSP00000082682	0.781676	0.428471	rgb(239,207,117)	High mobility group protein B1; Multifunctional redox sensitive protein with various roles in different cellular compartments. In the nucleus is one of the major chromatin-associated non-histone proteins and acts as a DNA chaperone involved in replication, transcription, chromatin remodeling, V(D)J recombination, DNA repair and genome stability. Proposed to be an universal biosensor for nucleic a…
Htt	10090.ENSMUSP00000078945	0.411668	0.255533	rgb(117,239,134)	[Huntingtin]: May play a role in microtubule-mediated transport or vesicle function
Ifih1	10090.ENSMUSP00000028259	0.721019	0.683803	rgb(255,255,255)	Interferon-induced helicase C domain-containing protein 1; Innate immune receptor which acts as a cytoplasmic sensor of viral nucleic acids and plays a major role in sensing viral infection and in the activation of a cascade of antiviral responses including the induction of type I interferons and proinflammatory cytokines. Its ligands include mRNA lacking 2'-O- methylation at their 5' cap and lon…
Il1r1	10090.ENSMUSP00000027241	0.912089	0.446579	rgb(255,255,255)	Interleukin-1 receptor type 1; Receptor for IL1A, IL1B and IL1RN. After binding to interleukin-1 associates with the coreceptor IL1RAP to form the high affinity interleukin-1 receptor complex which mediates interleukin-1-dependent activation of NF-kappa-B, MAPK and other pathways. Signaling involves the recruitment of adapter molecules such as TOLLIP, MYD88, and IRAK1 or IRAK2 via the respective …
Irf7	10090.ENSMUSP00000026571	0.849916	0.64668	rgb(255,255,255)	Interferon regulatory factor 7; Key transcriptional regulator of type I interferon (IFN)-dependent immune responses and plays a critical role in the innate immune response against DNA and RNA viruses. Regulates the transcription of type I IFN genes (IFN-alpha and IFN-beta) and IFN-stimulated genes (ISG) by binding to an interferon-stimulated response element (ISRE) in their promoters. Can efficie…
Itpr1	10090.ENSMUSP00000032192	0.491281	0.110664	rgb(239,189,117)	Inositol 1,4,5-trisphosphate receptor type 1; Intracellular channel that mediates calcium release from the endoplasmic reticulum following stimulation by inositol 1,4,5- trisphosphate. Involved in the regulation of epithelial secretion of electrolytes and fluid through the interaction with AHCYL1. Plays a role in ER stress-induced apoptosis. Cytoplasmic calcium released from the ER triggers apopt…
Map1lc3a	10090.ENSMUSP00000029128	0.3131	0.409457	rgb(172,239,117)	Microtubule-associated proteins 1A/1B light chain 3A; Ubiquitin-like modifier involved in formation of autophagosomal vacuoles (autophagosomes). Whereas LC3s are involved in elongation of the phagophore membrane, the GABARAP/GATE-16 subfamily is essential for a later stage in autophagosome maturation
Map1lc3b	10090.ENSMUSP00000034270	0.451853	0.497284	rgb(239,198,117)	Microtubule-associated proteins 1A/1B light chain 3B; Ubiquitin-like modifier involved in formation of autophagosomal vacuoles (autophagosomes). Plays a role in mitophagy which contributes to regulate mitochondrial quantity and quality by eliminating the mitochondria to a basal level to fulfill cellular energy requirements and preventing excess ROS production. Whereas LC3s are involved in elongat…
Mapk8	10090.ENSMUSP00000107576	0.653538	0.351509	rgb(117,239,170)	Mitogen-activated protein kinase 8/9/10 (c-jun n-terminal kinase); Mitogen-activated protein kinase 8; Serine/threonine-protein kinase involved in various processes such as cell proliferation, differentiation, migration, transformation and programmed cell death. Extracellular stimuli such as proinflammatory cytokines or physical stress stimulate the stress-activated protein kinase/c-Jun N-termina…
Mavs	10090.ENSMUSP00000105828	0.713437	0.586016	rgb(235,239,117)	Mitochondrial antiviral-signaling protein; Required for innate immune defense against viruses. Acts downstream of DDX58/RIG-I and IFIH1/MDA5, which detect intracellular dsRNA produced during viral replication, to coordinate pathways leading to the activation of NF-kappa-B, IRF3 and IRF7, and to the subsequent induction of antiviral cytokines such as IFN-beta and RANTES (CCL5). Peroxisomal and mit…
Mb21d1	10090.ENSMUSP00000063331	0.741491	0.754427	rgb(117,239,161)	Cyclic GMP-AMP synthase; Nucleotidyltransferase that catalyzes the formation of cyclic GMP-AMP (cGAMP) from ATP and GTP. Catalysis involves both the formation of a 2',5' phosphodiester linkage at the GpA step and the formation of a 3',5' phosphodiester linkage at the ApG step, producing c[G(2',5')pA(3',5')p]. Acts as a key cytosolic DNA sensor, the presence of double-stranded DNA (dsDNA) in the c…
Mcl1	10090.ENSMUSP00000044048	0.646714	0.260966	rgb(117,239,125)	Induced myeloid leukemia cell differentiation protein Mcl-1 homolog; Involved in the regulation of apoptosis versus cell survival, and in the maintenance of viability but not of proliferation. Mediates its effects by interactions with a number of other regulators of apoptosis. Isoform 2 has antiapoptotic activity; Belongs to the Bcl-2 family
Myd88	10090.ENSMUSP00000035092	0.749073	0.513581	rgb(208,239,117)	Myeloid differentiation primary response protein MyD88; Adapter protein involved in the Toll-like receptor and IL-1 receptor signaling pathway in the innate immune response. Acts via IRAK1, IRAK2, IRF7 and TRAF6, leading to NF-kappa-B activation, cytokine secretion and the inflammatory response. Increases IL-8 transcription. Involved in IL-18-mediated signaling pathway. Isoform 2 is defective in …
Nbr1	10090.ENSMUSP00000099388	0.535257	0.598692	rgb(117,239,206)	NBR1, autophagy cargo receptor; Next to BRCA1 gene 1 protein; Acts probably as a receptor for selective autophagosomal degradation of ubiquitinated targets
Ngfr	10090.ENSMUSP00000000122	0.732393	0.401308	rgb(255,255,255)	Nerve growth factor receptor (tnfr superfamily, member 16); Low affinity neurotrophin receptor which can bind to mature NGF, BDNF, NTF3, and NTF4 . Forms a heterodimeric receptor with SORCS2 that binds the precursor forms of NGF (proNGF), BDNF (proBDNF) and NTF3 (proNT3) with high affinity, and has much lower affinity for mature NGF and BDNF Plays an important role in differentiation and survival…
Park2	10090.ENSMUSP00000140587	0.499621	0.280885	rgb(226,239,117)	E3 ubiquitin-protein ligase parkin; Functions within a multiprotein E3 ubiquitin ligase complex, catalyzing the covalent attachment of ubiquitin moieties onto substrate proteins, such as BCL2, SYT11, CCNE1, GPR37, RHOT1/MIRO1, MFN1, MFN2, STUB1, SNCAIP, SEPT5, TOMM20, USP30, ZNF746 and AIMP2. Mediates monoubiquitination as well as 'Lys-6', 'Lys-11', 'Lys-48'-linked and 'Lys-63'-linked polyubiquit…
Pik3c3	10090.ENSMUSP00000111479	0.372999	0.464688	rgb(178,171,0)	Phosphatidylinositol 3-kinase catalytic subunit type 3; Catalytic subunit of the PI3K complex that mediates formation of phosphatidylinositol 3-phosphate; different complex forms are believed to play a role in multiple membrane trafficking pathways: PI3KC3-C1 is involved in initiation of autophagosomes and PI3KC3-C2 in maturation of autophagosomes and endocytosis. Involved in regulation of degrad…
Pik3r4	10090.ENSMUSP00000067400	0.261542	0.506338	rgb(239,144,117)	Phosphoinositide 3-kinase regulatory subunit 4; Regulatory subunit of the PI3K complex that mediates formation of phosphatidylinositol 3-phosphate; different complex forms are believed to play a role in multiple membrane trafficking pathways: PI3KC3-C1 is involved in initiation of autophagosomes and PI3KC3-C2 in maturation of autophagosomes and endocytosis. Involved in regulation of degradative e…
Pikfyve	10090.ENSMUSP00000095314	0.168281	0.366901	rgb(117,239,197)	Phosphoinositide kinase, fyve type zinc finger containing; 1-phosphatidylinositol 3-phosphate 5-kinase; The PI(3,5)P2 regulatory complex regulates both the synthesis and turnover of phosphatidylinositol 3,5-bisphosphate (PtdIns(3,5)P2). Catalyzes the phosphorylation of phosphatidylinositol 3-phosphate on the fifth hydroxyl of the myo- inositol ring, to form phosphatidylinositol 3,5-bisphosphate. …
Pink1	10090.ENSMUSP00000030536	0.436689	0.325252	rgb(239,171,117)	Serine/threonine-protein kinase PINK1, mitochondrial; Protects against mitochondrial dysfunction during cellular stress by phosphorylating mitochondrial proteins. Involved in the clearance of damaged mitochondria via selective autophagy (mitophagy) by mediating activation and translocation of PRKN. Targets PRKN to dysfunctional depolarized mitochondria through the phosphorylation of MFN2 (By simi…
Pmaip1	10090.ENSMUSP00000025399	0.594398	0.0997988	rgb(255,255,255)	Phorbol-12-myristate-13-acetate-induced protein 1; Promotes activation of caspases and apoptosis. Promotes mitochondrial membrane changes and efflux of apoptogenic proteins from the mitochondria. Contributes to p53/TP53-dependent apoptosis after radiation exposure. Promotes proteasomal degradation of MCL1. Competes with BIM/BCL2L11 for binding to MCL1 and can displace BIM/BCL2L11 from its binding…
Rb1cc1	10090.ENSMUSP00000027040	0.32599	0.632193	rgb(181,239,117)	RB1-inducible coiled-coil protein 1; Involved in autophagy. Regulates early events but also late events of autophagosome formation through direct interaction with Atg16L1. Required for the formation of the autophagosome-like double-membrane structure that surrounds the Salmonella-containing vacuole (SCV) during S.typhimurium infection and subsequent xenophagy. Involved in repair of DNA damage cau…
Rubcn	10090.ENSMUSP00000087114	0.310826	0.309859	rgb(239,216,117)	Run domain Beclin-1-interacting and cysteine-rich domain-containing protein; Inhibits PIK3C3 activity; under basal conditions negatively regulates PI3K complex II (PI3KC3-C2) function in autophagy. Negatively regulates endosome maturation and degradative endocytic trafficking and impairs autophagosome maturation process. Can sequester UVRAG from association with a class C Vps complex (possibly th…
Sh3glb1	10090.ENSMUSP00000129800	0.245619	0.294467	rgb(117,239,215)	SH3-domain GRB2-like B1 (endophilin); Endophilin-B1; May be required for normal outer mitochondrial membrane dynamics. Required for coatomer-mediated retrograde transport in certain cells. May recruit other proteins to membranes with high curvature. May promote membrane fusion (By similarity). Involved in activation of caspase-dependent apoptosis by promoting BAX/BAK1 activation. Isoform 1 acts p…
Sqstm1	10090.ENSMUSP00000099835	0.542839	0.529879	rgb(127,239,117)	Sequestosome-1; Autophagy receptor that interacts directly with both the cargo to become degraded and an autophagy modifier of the MAP1 LC3 family. Required both for the formation and autophagic degradation of polyubiquitin-containing bodies, called ALIS (aggresome-like induced structures) and links ALIS to the autophagic machinery. Involved in midbody ring degradation (By similarity). May regula…
Tab1	10090.ENSMUSP00000023050	0.870388	0.576056	rgb(255,255,255)	TGF-beta-activated kinase 1 and MAP3K7-binding protein 1; May be an important signaling intermediate between TGFB receptors and MAP3K7/TAK1. May play an important role in mammalian embryogenesis
Tecpr1	10090.ENSMUSP00000082844	0.269124	0.778873	rgb(136,239,117)	Tectonin beta-propeller repeat-containing protein 1; Tethering factor involved in autophagy. Involved in autophagosome maturation by promoting the autophagosome fusion with lysosomes: acts by associating with both the ATG5-ATG12 conjugate and phosphatidylinositol-3-phosphate (PtdIns(3)P) present at the surface of autophagosomes. Also involved in selective autophagy against bacterial pathogens, by…
Traf3	10090.ENSMUSP00000021706	0.830202	0.480986	rgb(255,255,255)	TNF receptor-associated factor 3; Regulates pathways leading to the activation of NF- kappa-B and MAP kinases, and plays a central role in the regulation of B-cell survival. Part of signaling pathways leading to the production of cytokines and interferon. Required for normal antibody isotype switching from IgM to IgG. Plays a role T-cell dependent immune responses. Plays a role in the regulation …
Traf6	10090.ENSMUSP00000004949	0.683109	0.502716	rgb(117,239,152)	TNF receptor-associated factor 6; E3 ubiquitin ligase that, together with UBE2N and UBE2V1, mediates the synthesis of 'Lys-63'-linked-polyubiquitin chains conjugated to proteins, such as IKBKG, IRAK1, AKT1 and AKT2. Also mediates ubiquitination of free/unanchored polyubiquitin chain that leads to MAP3K7 activation (By similarity). Leads to the activation of NF-kappa-B and JUN. May be essential fo…
Ulk1	10090.ENSMUSP00000031490	0.498104	0.676559	rgb(239,180,117)	Serine/threonine-protein kinase ULK1; Serine/threonine-protein kinase involved in autophagy in response to starvation. Acts upstream of phosphatidylinositol 3- kinase PIK3C3 to regulate the formation of autophagophores, the precursors of autophagosomes. Part of regulatory feedback loops in autophagy: acts both as a downstream effector and negative regulator of mammalian target of rapamycin comple…
Ulk2	10090.ENSMUSP00000004920	0.432898	0.642153	rgb(117,239,143)	Serine/threonine-protein kinase ULK2; Serine/threonine-protein kinase involved in autophagy in response to starvation. Acts upstream of phosphatidylinositol 3- kinase PIK3C3 to regulate the formation of autophagophores, the precursors of autophagosomes. Part of regulatory feedback loops in autophagy: acts both as a downstream effector and a negative regulator of mammalian target of rapamycin comp…
Uvrag	10090.ENSMUSP00000045297	0.324473	0.46831	rgb(239,126,117)	UV radiation resistance associated protein; Versatile protein that is involved in regulation of different cellular pathways implicated in membrane trafficking. Involved in regulation of the COPI-dependent retrograde transport from Golgi and the endoplasmic reticulum by associating with the NRZ complex; the function is dependent on its binding to phosphatidylinositol 3-phosphate (PtdIns(3)P). Duri…
Vcp	10090.ENSMUSP00000030164	0.554212	0.313481	rgb(255,255,255)	Transitional endoplasmic reticulum ATPase; Necessary for the fragmentation of Golgi stacks during mitosis and for their reassembly after mitosis. Involved in the formation of the transitional endoplasmic reticulum (tER). The transfer of membranes from the endoplasmic reticulum to the Golgi apparatus occurs via 50-70 nm transition vesicles which derive from part-rough, part-smooth transitional ele…
Vmp1	10090.ENSMUSP00000018315	0.235762	0.355131	rgb(239,162,117)	Vacuole membrane protein 1; Stress-induced protein that, when overexpressed, promotes formation of intracellular vacuoles followed by cell death. May be involved in the cytoplasmic vacuolization of acinar cells during the early stage of acute pancreatitis. Involved in cell-cell adhesion. Plays an essential role in formation of cell junctions (By similarity). Plays a role in the initial stages of …
Wipi2	10090.ENSMUSP00000045201	0.259267	0.61499	rgb(154,239,117)	WD repeat domain phosphoinositide-interacting protein 2; Early component of the autophagy machinery being involved in formation of preautophagosomal structures and their maturation into mature phagosomes in response to phosphatidylinositol 3-phosphate (PtdIns3P). Recruits the ATG12- ATG5-ATG16L1 complex to omegasomes, resulting in ATG8 family proteins lipidation and starvation-induced autophagy. …
Zfyve20	10090.ENSMUSP00000014694	0.0826032	0.471932	rgb(117,227,239)	Rabenosyn, rab effector; Rabenosyn-5; Rab4/Rab5 effector protein acting in early endocytic membrane fusion and membrane trafficking of recycling endosomes. Required for endosome fusion either homotypically or with clathrin coated vesicles. Plays a role in the lysosomal trafficking of CTSD/cathepsin D from the Golgi to lysosomes. Also promotes the recycling of transferrin directly from early endos…
The co-expressed differential genes, including Becn1, Atg3, Atg12, Pik3c3, and Gabarapl2, the other 60 interactive genes and their detail were showed in the table.
Supplementary Table 2 GO and KEGG enrichment lists.
Supplementary Table 2A Top 20 clusters with their representative enriched terms in biological processes.
GO	Category	Description	Count	%	Log10(P)	Log10(q)
GO:0006914	GO Biological Processes	autophagy	43	66.15	-55.83	-52.11
GO:0044804	GO Biological Processes	autophagy of nucleus	11	16.92	-24.24	-21.13
GO:0061912	GO Biological Processes	selective autophagy	14	21.54	-21.5	-18.49
GO:0010506	GO Biological Processes	regulation of autophagy	14	21.54	-13.2	-10.4
GO:0097352	GO Biological Processes	autophagosome maturation	8	12.31	-12.73	-9.95
GO:0051607	GO Biological Processes	defense response to virus	13	20	-11.94	-9.22
GO:2001233	GO Biological Processes	regulation of apoptotic signaling pathway	15	23.08	-11.8	-9.11
GO:0016237	GO Biological Processes	lysosomal microautophagy	5	7.69	-11.24	-8.62
GO:0006501	GO Biological Processes	C-terminal protein lipidation	5	7.69	-11.24	-8.62
GO:0042149	GO Biological Processes	cellular response to glucose starvation	7	10.77	-9.75	-7.22
GO:0051881	GO Biological Processes	regulation of mitochondrial membrane potential	8	12.31	-9.59	-7.07
GO:0016032	GO Biological Processes	viral process	12	18.46	-9.1	-6.62
GO:0097191	GO Biological Processes	extrinsic apoptotic signaling pathway	10	15.38	-8.42	-6.02
GO:0045862	GO Biological Processes	positive regulation of proteolysis	11	16.92	-7.89	-5.52
GO:0080135	GO Biological Processes	regulation of cellular response to stress	14	21.54	-7.82	-5.45
GO:2000378	GO Biological Processes	negative regulation of reactive oxygen species metabolic process	6	9.23	-7.69	-5.35
GO:0032446	GO Biological Processes	protein modification by small protein conjugation	14	21.54	-7.44	-5.14
GO:0043551	GO Biological Processes	regulation of phosphatidylinositol 3-kinase activity	5	7.69	-6.78	-4.56
GO:0062197	GO Biological Processes	cellular response to chemical stress	9	13.85	-5.99	-3.86
GO:0035973	GO Biological Processes	aggrephagy	3	4.62	-5.77	-3.68
Supplementary Table 2B Top 17 clusters with their representative enriched terms in cellular component
GO	Category	Description	Count	%	Log10(P)	Log10(q)
GO:0005776	GO Cellular Components	autophagosome	23	35.38	-40.37	-37.09
GO:0000407	GO Cellular Components	phagophore assembly site	17	26.15	-35.07	-32.09
GO:0032838	GO Cellular Components	plasma membrane bounded cell projection cytoplasm	11	16.92	-10.9	-8.47
GO:0035032	GO Cellular Components	phosphatidylinositol 3-kinase complex, class III	4	6.15	-8.5	-6.17
GO:0044754	GO Cellular Components	autolysosome	4	6.15	-7.19	-4.99
GO:0005770	GO Cellular Components	late endosome	9	13.85	-7.13	-4.97
GO:0005741	GO Cellular Components	mitochondrial outer membrane	8	12.31	-6.93	-4.84
GO:0097136	GO Cellular Components	Bcl-2 family protein complex	3	4.62	-6.22	-4.26
GO:1990316	GO Cellular Components	Atg1/ULK1 kinase complex	3	4.62	-5.77	-3.88
GO:0035631	GO Cellular Components	CD40 receptor complex	3	4.62	-5.31	-3.46
GO:0048471	GO Cellular Components	perinuclear region of cytoplasm	10	15.38	-4.23	-2.46
GO:0030424	GO Cellular Components	axon	10	15.38	-4.02	-2.26
GO:0016234	GO Cellular Components	inclusion body	4	6.15	-3.94	-2.19
GO:0120111	GO Cellular Components	neuron projection cytoplasm	3	4.62	-3.5	-1.8
GO:0000139	GO Cellular Components	Golgi membrane	4	6.15	-1.98	-0.4
GO:0005777	GO Cellular Components	peroxisome	3	4.62	-1.91	-0.36
GO:0031256	GO Cellular Components	leading edge membrane	3	4.62	-1.86	-0.32
Supplementary Table 2C Top 15 clusters with their representative enriched terms in molecular function.
GO	Category	Description	Count	%	Log10(P)	Log10(q)
GO:0031625	GO Molecular Functions	ubiquitin protein ligase binding	18	27.69	-17.49	-13.81
GO:0019901	GO Molecular Functions	protein kinase binding	15	23.08	-7.9	-4.7
GO:0051434	GO Molecular Functions	BH3 domain binding	3	4.62	-5.98	-2.9
GO:0051020	GO Molecular Functions	GTPase binding	8	12.31	-5.19	-2.28
GO:0043422	GO Molecular Functions	protein kinase B binding	3	4.62	-4.7	-1.92
GO:0008234	GO Molecular Functions	cysteine-type peptidase activity	6	9.23	-4.6	-1.91
GO:0002020	GO Molecular Functions	protease binding	6	9.23	-4.59	-1.91
GO:0005543	GO Molecular Functions	phospholipid binding	8	12.31	-4.02	-1.39
GO:0032813	GO Molecular Functions	tumor necrosis factor receptor superfamily binding	3	4.62	-3.32	-0.79
GO:0106310	GO Molecular Functions	protein serine kinase activity	5	7.69	-2.96	-0.49
GO:0015631	GO Molecular Functions	tubulin binding	6	9.23	-2.89	-0.45
GO:0003725	GO Molecular Functions	double-stranded RNA binding	3	4.62	-2.62	-0.25
GO:0043130	GO Molecular Functions	ubiquitin binding	3	4.62	-2.6	-0.25
GO:0042826	GO Molecular Functions	histone deacetylase binding	3	4.62	-2.07	0
GO:0031072	GO Molecular Functions	heat shock protein binding	3	4.62	-1.94	0
Supplementary Table 2D Top 12 clusters with their representative enriched terms in KEGG pathways.
GO	Category	Description	Count	%	Log10(P)	Log10(q)
ko04140	KEGG Pathway	Autophagy - animal	38	58.46	-68.01	-65.42
ko04137	KEGG Pathway	Mitophagy - animal	15	23.08	-24.2	-22.09
ko04621	KEGG Pathway	NOD-like receptor signaling pathway	16	24.62	-19	-16.97
ko04064	KEGG Pathway	NF-kappa B signaling pathway	10	15.38	-12.25	-10.32
ko04215	KEGG Pathway	Apoptosis - multiple species	7	10.77	-11.14	-9.39
mmu04371	KEGG Pathway	Apelin signaling pathway	7	10.77	-6.48	-5.01
ko04216	KEGG Pathway	Ferroptosis	4	6.15	-5.11	-3.71
mmu04211	KEGG Pathway	Longevity regulating pathway	5	7.69	-4.96	-3.59
ko04141	KEGG Pathway	Protein processing in endoplasmic reticulum	5	7.69	-3.73	-2.54
ko04070	KEGG Pathway	Phosphatidylinositol signaling system	3	4.62	-2.45	-1.46
ko05203	KEGG Pathway	Viral carcinogenesis	4	6.15	-2.21	-1.21
ko05166	KEGG Pathway	HTLV-I infection	4	6.15	-1.9	-0.94
Supplementary Table 3 The protein sequences of DEGs and their potential LIR sequences.
Ncbi protein FASTA
beclin-1 isoform 1 [Mus musculus]
NCBI Reference Sequence: NP_062530.2
GenPept Identical Proteins Graphics
>NP_062530.2 beclin-1 isoform 1 [Mus musculus]
ubiquitin-like-conjugating enzyme ATG3 isoform 1 [Mus musculus]
NCBI Reference Sequence: NP_080678.1
GenPept Identical Proteins Graphics
>NP_080678.1 ubiquitin-like-conjugating enzyme ATG3 isoform 1 [Mus musculus]
ubiquitin-like protein ATG12 [Mus musculus]
NCBI Reference Sequence: NP_080493.2
GenPept Identical Proteins Graphics
>NP_080493.2 ubiquitin-like protein ATG12 [Mus musculus]
phosphatidylinositol 3-kinase catalytic subunit type 3 [Mus musculus]
NCBI Reference Sequence: NP_852079.2
GenPept Identical Proteins Graphics
>NP_852079.2 phosphatidylinositol 3-kinase catalytic subunit type 3 [Mus musculus]
gamma-aminobutyric acid receptor-associated protein-like 2 [Mus musculus]
NCBI Reference Sequence: NP_080969.2
GenPept Identical Proteins Graphics
>NP_080969.2 gamma-aminobutyric acid receptor-associated protein-like 2 [Mus musculus]
The predicted LIR sequences were marked yellow color and the potential overlapping sequences were marked red.
Supplementary Table 4 The summary information of predicted miRNAs.
mirnaid	refseqid	genesymbol	duplex	start	end	bindingp	energy	seed	accessibility	au	phylopstem	phylopflank	me	number_of_pairings	binding_region_length	longest_consecutive_pairings	position	validated	TargetScan	miRDB
mmu-miR-124-5p	NM_026402	Atg3	.(((((((.(((..((((((((&)))))))))))..))))))).	1465	1486	1	-19.2	1	0.000991696	0.559	0.11163	0.142999	-6.99569	18	21	11	3UTR		0	0
mmu-miR-133a-3p	NM_026402	Atg3	...((((((((((((((.((((&.)))).))..)))))))))).)).	1723	1754	1	-21.1	1	0.012852	0.618	0.422007	0.0223493	-6.51454	18	24	10	3UTR		0	0
mmu-miR-137-5p	NM_026402	Atg3	..((((((((((((((((.....&.)))))))))))))))).	1939	1986	1	-21.3	1	0.102659	0.727	-0.181951	0.154259	-4.957	16	18	16	3UTR		0	0
mmu-miR-149-3p	NM_026402	Atg3	.(((((((((((.(((((((..&))).))))...))))))))))).	1522	1545	1	-29	1	0.0396789	0.456	-0.62543	-0.196429	-5.08246	18	23	11	3UTR		0	0
mmu-miR-301a-5p	NM_026402	Atg3	((((((((((...((((.....&)))))))))))))).	1459	1474	1	-17.8	1	0.00122227	0.515	0.233889	0.137369	-11.3983	14	15	14	3UTR		0	0
mmu-miR-329-5p	NM_026402	Atg3	((((((..(((((((.......&.)))))))..)))))).	1664	1686	1	-19.6	1	0.0528533	0.662	-0.228487	0.0432619	-8.02794	13	17	7	3UTR		0	0
mmu-miR-351-5p	NM_026402	Atg3	.((((((((((((((..((((((.&))))))....))))))))........................)))))).	1424	1473	1	-26.5	1	0.00103522	0.515	0.140417	0.705226	-4.02637	20	49	8	3UTR		0	0
mmu-miR-17-3p	NM_026402	Atg3	((((((((.((((((..(((((&)))))..))))))..))).))))).	1570	1595	1	-21	1	0.0172915	0.529	0.11163	-0.256754	-5.22701	19	25	6	3UTR		0	0
mmu-miR-222-3p	NM_026402	Atg3	(((((..((((((.(((((....&)))))))))))..))))).	1488	1507	1	-21.7	1	0.00406259	0.529	0.0687317	-0.0983004	-8.23906	16	19	11	3UTR		0	0
mmu-miR-181b-5p	NM_026402	Atg3	..((.(((((((((.(((.(((..&)))))).))).)))))).)).	1441	1462	1	-20.8	1	0.000326792	0.529	-0.087844	0.313517	-9.81149	17	21	6	3UTR		0	0
mmu-miR-365-1-5p	NM_026402	Atg3	.((.(((((..((((((((((((&)))))))))))).....................))))).)).	1571	1613	1	-21.8	1	0.00229739	0.588	-0.333433	-0.110366	-10.8926	19	42	12	3UTR		0	0
mmu-miR-376a-5p	NM_026402	Atg3	(((((((((((((((.......&))))))))))))..))).	1742	1760	1	-18.7	1	0.00180917	0.618	-0.0549134	0.0891087	-4.17062	15	18	12	3UTR		0	0
mmu-miR-133b-3p	NM_026402	Atg3	...((((((((((((((.((((&)))).))..)))))))))).)).	1731	1754	1	-21.1	1	0.012852	0.618	0.134341	0.0625658	-6.51454	18	23	10	3UTR		0	0
mmu-miR-452-5p	NM_026402	Atg3	(((((((((.(((((((.....&.))))))).))).)))))).	1418	1455	1	-19.4	1	0.000169427	0.515	0.0279795	0.792898	-5.18008	16	20	7	3UTR		0	0
mmu-miR-540-5p	NM_026402	Atg3	(((.((.(((((..(((((((((&)))))))))))))))).))).	1460	1481	1	-24.8	1	0.000141585	0.515	0.218874	0.249171	-10.6593	19	21	16	3UTR		0	0
mmu-miR-684	NM_026402	Atg3	((.((((((((((((((..&)))))))))))))).)).	1737	1755	1	-23.9	1	0.0139115	0.603	0.20815	0.0440662	-5.49511	16	18	14	3UTR		0	0
mmu-miR-709	NM_026402	Atg3	(((((((((((((..(((.&.)))....)))))))..)))))).	1879	1917	1	-25.8	1	0.0497283	0.588	-0.390273	-0.0991046	-5.52986	16	24	7	3UTR		0	0
mmu-miR-676-5p	NM_026402	Atg3	(((((((((((((..(((....&)))..))))))...))))))).	1418	1440	1	-18.3	1	0.00103142	0.559	0.216193	0.897461	-5.52986	16	22	7	3UTR		0	0
mmu-miR-883a-5p	NM_026402	Atg3	.((((((((..(((((((....&.)))))))..)))))))).	1876	1913	1	-22.1	1	0.0809104	0.618	-0.290536	-0.0846266	-7.86061	15	19	8	3UTR		0	0
mmu-miR-147-5p	NM_026402	Atg3	(((((((((((((.(((((((...&.))))))).))))))))))))).	1363	1413	1	-24.9	1	0.00039933	0.691	2.5271	1.35834	-4.79441	20	23	13	3UTR		0	0
mmu-miR-193b-5p	NM_026402	Atg3	.((((((((((.((.(((((((&))))))))).))))))................)))).	1409	1446	1	-20.3	1	3.54327e-05	0.515	0.349217	1.05511	-7.87558	19	37	9	3UTR		0	0
mmu-miR-193b-3p	NM_026402	Atg3	(((((((((...((((((((((&))))))))))....)))...................)))))).	1732	1775	1	-22.9	1	0.000927721	0.618	0.227454	-0.0138456	-11.3517	19	43	10	3UTR		0	0
mmu-miR-327	NM_026402	Atg3	..(((((((((((((((((&))))...))))))))))))).	1891	1912	1	-21.8	1	0.0839007	0.618	-0.24871	-0.152995	-4.957	17	21	13	3UTR		0	0
mmu-miR-493-3p	NM_026402	Atg3	...((((((((((((.(((....&)))..)))))))))))).	1725	1743	1	-18.6	1	0.0321732	0.632	0.352929	-0.0251062	-6.74759	15	18	12	3UTR		0	0
mmu-miR-504-3p	NM_026402	Atg3	((((((((((((((.(((....&.))).))))))..)))))))).	1540	1573	1	-28.9	1	0.145267	0.5	-0.64042	0.019132	-4.67302	17	22	8	3UTR		0	0
mmu-miR-877-5p	NM_026402	Atg3	((((.(((((.((.((((((&))))))))))))))))).	1557	1575	1	-22.8	1	0.150937	0.5	-0.467488	-0.0613012	-11.7382	17	18	17	3UTR		0	0
mmu-miR-669h-5p	NM_026402	Atg3	..((((((((((((((((.(((((&))))))))))))))))......))))).	1607	1635	1	-21.5	1	0.00515729	0.662	0.193526	-0.0588883	-4.957	21	28	16	3UTR		0	0
mmu-miR-1190	NM_026402	Atg3	..(((.((((((((((((.(((&.)))..)).)))))))))).))).	1730	1760	1	-23.7	1	0.00180917	0.618	0.373966	0.026371	-6.85796	18	24	10	3UTR		0	0
mmu-miR-1906	NM_026402	Atg3	...((((.((((((((((((..&))))))).................))))).)))).	1442	1477	1	-24.3	1	0.00233447	0.529	0.0650343	0.430949	-8.82818	16	35	7	3UTR		0	0
mmu-miR-1898	NM_026402	Atg3	.((((((((.((((((......&)))))))).)))))).	1277	1293	1	-20.5	1	0.0765925	0.765	2.64554	1.69554	-5.03583	14	16	8	3UTR		0	1
mmu-miR-1963	NM_026402	Atg3	.((((.((((((((.((((....&))))))).))))))))).	1526	1544	1	-20.7	1	0.0343422	0.471	-0.80352	-0.211711	-6.42973	16	18	9	3UTR		0	0
mmu-miR-664-5p	NM_026402	Atg3	(((((.(((((((...(((((&)))))....))))))).))))).	1429	1452	1	-23.8	1	3.55661e-05	0.515	0.240323	0.578142	-7.66387	17	23	7	3UTR		0	0
mmu-miR-3057-5p	NM_026402	Atg3	..(((((((((((....(((((((&))))).))......)))))).))))).	1891	1918	1	-23	1	0.0445677	0.574	0.00438604	-0.1168	-6.78234	18	27	6	3UTR		0	0
mmu-miR-3070-2-3p	NM_026402	Atg3	(((((.(((((((((.(((...&))).)))))))))..))))).	1282	1303	1	-20.7	1	0.28866	0.735	2.32639	1.7824	-6.07158	17	21	9	3UTR		0	0
mmu-miR-3082-3p	NM_026402	Atg3	((.(((((((((.(((((((((&)))))))))..))))))))))).	1458	1481	1	-25.2	1	0.000141585	0.515	0.361866	0.273301	-6.78424	20	23	11	3UTR		0	0
mmu-miR-3090-3p	NM_026402	Atg3	...(((..(.(((((((((((.&))))))))))))..))).	1463	1481	1	-24.9	1	0.000141585	0.515	0.158428	0.144608	-11.6144	15	18	12	3UTR		0	0
mmu-miR-5623-5p	NM_026402	Atg3	((((((((((((..((((((.(((&)))))))))..)))))...)).))))).	1597	1625	1	-20.4	1	0.000565008	0.618	0.167933	-0.130474	-6.08354	21	28	9	3UTR		0	0
mmu-miR-3073b-5p	NM_026402	Atg3	(((((((((((...........&))))))))))).	1276	1288	1	-17.8	1	0.0873195	0.75	2.13377	1.5218	-10.3988	11	12	11	3UTR		0	1
mmu-miR-133c	NM_026402	Atg3	...(((((((((((((...(((.&)))..))))))))))).)).	1734	1754	1	-21.5	1	0.012852	0.618	0.120823	0.0762395	-6.51454	16	20	11	3UTR		0	0
mmu-miR-6356	NM_026402	Atg3	(((((.((((((((.......&))))))))...))))).	1734	1751	1	-20.2	1	0.0143811	0.618	0.119673	-0.0186716	-6.80703	13	17	8	3UTR		0	0
mmu-miR-6391	NM_026402	Atg3	..((((((((((((((((.((&)).))))))))))..............)))))).	1556	1590	1	-21.5	1	0.00253778	0.529	-0.407431	-0.0444103	-4.957	18	34	10	3UTR		0	0
mmu-miR-6898-5p	NM_026402	Atg3	.(((((((.(((((.((((((.&)))))).))))).)))).))).	1566	1588	1	-24.9	1	0.00806333	0.529	0.0392404	-0.24871	-5.58516	18	22	6	3UTR		0	0
mmu-miR-6912-5p	NM_026402	Atg3	...(((((((((((.(((((..&))))).))).)))))))).	1526	1545	1	-26.6	1	0.0396789	0.456	-0.633717	-0.203668	-7.24999	16	19	8	3UTR		0	0
mmu-miR-6921-5p	NM_026402	Atg3	((((((((((((.(..(((...&.))).).)))))))))))).	1881	1911	1	-22.3	1	0.0863031	0.618	-0.472851	-0.112778	-6.1952	16	20	12	3UTR		0	0
mmu-miR-6922-5p	NM_026402	Atg3	(((((((((((((......((((&)))))))))))))).))).	1557	1576	1	-23	1	0.147417	0.5	-0.724874	-0.0251065	-5.76291	17	19	14	3UTR		0	0
mmu-miR-6925-3p	NM_026402	Atg3	((((((((..((((.(..&.).))))...)))))))).	1716	1751	1	-19.7	1	0.0143811	0.618	0.529883	0.0561312	-6.97192	13	19	8	3UTR		0	0
mmu-miR-6940-5p	NM_026402	Atg3	.(((((((((((((.((((((..&.)))))).))))).)))))))).	1487	1531	1	-25.9	1	0.018939	0.485	0.0932456	-0.24871	-4.52877	19	23	8	3UTR		0	0
mmu-miR-6965-5p	NM_026402	Atg3	((((((((((...((((..((((.&))))...)))))))))..))))).	1545	1569	1	-23.5	1	0.455198	0.485	-0.735599	0.00626258	-11.3983	18	24	9	3UTR		0	0
mmu-miR-6979-5p	NM_026402	Atg3	(((((((((((.((.(((..&))).)).))))))))))).	1524	1543	1	-25.7	1	0.028575	0.456	-0.719025	-0.211711	-8.01983	16	19	11	3UTR		0	0
mmu-miR-6989-5p	NM_026402	Atg3	.((((((((((((((.......&)))))))..))))))).	1901	1918	1	-21.9	1	0.0445677	0.574	-0.0210845	-0.0958872	-4.02637	14	17	7	3UTR		0	0
mmu-miR-6995-5p	NM_026402	Atg3	((((((((.(((((((((.((((&.)).)).)))))))..)).)))))))).	1521	1558	1	-25.2	1	0.326195	0.426	-0.689777	-0.202059	-4.99396	21	28	8	3UTR		0	0
mmu-miR-6995-5p	NM_026402	Atg3	...(((((((((((((((.....&)))))))...)))))))).	1565	1584	1	-21.6	1	0.0179502	0.515	-0.492511	-0.0789966	-6.51454	15	19	8	3UTR		0	0
mmu-miR-6997-5p	NM_026402	Atg3	..(((((((((...((.(((..&))).))...))))))))).	1514	1533	1	-23.4	1	0.012396	0.485	0.0687322	-0.293753	-10.4498	14	19	9	3UTR		0	0
mmu-miR-6997-5p	NM_026402	Atg3	..(((((((((((((((((((.&))))...)))))))...........)))))))).	1895	1929	1	-22.9	1	0.0247244	0.574	-0.102858	-0.0243019	-4.957	19	34	8	3UTR		0	0
mmu-miR-7010-5p	NM_026402	Atg3	.(((((((.(((((((......&))))))))))).))).	1550	1566	1	-18	1	0.426227	0.471	-0.522642	-0.09267	-4.84971	14	16	11	3UTR		0	0
mmu-miR-7016-5p	NM_026402	Atg3	.((((((((((.((((.((..&.)))))))))))))))).	1542	1573	1	-24.4	1	0.145267	0.5	-0.467488	-0.0484318	-7.14013	16	18	16	3UTR		0	0
mmu-miR-7017-5p	NM_026402	Atg3	..((((..(.((.((..((((((.&))))))..)).)).).)))).	1524	1545	1	-22.9	1	0.0396789	0.456	0.186701	-0.263992	-11.579	15	21	6	3UTR		0	0
mmu-miR-7020-5p	NM_026402	Atg3	(((((..((((((((((.((....&)).)))).))))))))))).	1537	1557	1	-24.6	1	0.332125	0.426	-0.455789	-0.070953	-7.38222	17	20	11	3UTR		0	0
mmu-miR-7035-5p	NM_026402	Atg3	((((((((((((((...(((.&)))..))))))...)))))))).	1537	1560	1	-24.6	1	0.333078	0.441	-0.603751	0.0400446	-4.90607	17	23	8	3UTR		0	1
mmu-miR-7041-5p	NM_026402	Atg3	...((((((((((..........&)))))))))).	1545	1556	1	-19.4	1	0.348209	0.441	-0.557573	-0.0629096	-8.33988	10	11	10	3UTR		0	0
mmu-miR-7060-5p	NM_026402	Atg3	(((((.((((((((((((((..&)))))))))..)))))))))).	1355	1377	1	-22.3	1	0.0483046	0.735	1.9455	1.8051	-5.83853	19	22	10	3UTR		0	0
mmu-miR-7084-3p	NM_026402	Atg3	...(((((((((((..((((((&)))))).))))).....................)))))).	1460	1500	1	-23.3	1	0.00192867	0.515	-0.0814096	0.0279796	-7.48304	17	40	6	3UTR		0	0
mmu-miR-7215-3p	NM_026402	Atg3	....((((((((((....((.((&))))....)))))))))).	1893	1912	1	-21.8	1	0.0839007	0.618	-0.107148	-0.136104	-10.5151	14	19	10	3UTR		0	0
mmu-miR-7234-3p	NM_026402	Atg3	.((((.(((((((((((......&.))))))))))))))).	1484	1519	1	-17.7	1	0.00848832	0.515	0.257872	-0.0275192	-5.69428	15	17	15	3UTR		0	0
mmu-miR-7676-5p	NM_026402	Atg3	.((((((((..(((((((((...&)))))))))...............)))))))).	1219	1252	1	-21.4	1	0.013812	0.676	1.01433	3.27763	-7.86061	17	33	9	3UTR		0	0
mmu-miR-6715-5p	NM_026402	Atg3	..(((((.((((((.(((.((((&.)))))))))))))))))).	1513	1539	1	-21.7	1	0.0145734	0.471	0.154528	-0.3396	-8.00609	18	20	18	3UTR		0	0
mmu-miR-3620-5p	NM_026402	Atg3	..(.((((.((((((((((...&)))))))))).)))).).	1550	1568	1	-26.6	1	0.446449	0.485	-0.51253	-0.0532579	-9.04541	15	18	10	3UTR		0	0
mmu-miR-8100	NM_026402	Atg3	.(((((..((((.(((((((((.&)))))).)))))))...))))).	1894	1917	1	-21.7	1	0.0497283	0.588	-0.332361	-0.113583	-8.93978	18	23	7	3UTR		0	0
mmu-miR-8107	NM_026402	Atg3	.(((((((....((((((((.&))))))))..))))))).	1426	1444	1	-19.9	1	0.000570593	0.529	-0.0974961	0.818637	-12.2638	15	18	8	3UTR		0	0
mmu-miR-8111	NM_026402	Atg3	...((((.((((((((.(((.&)))..)))))))))))).	1356	1374	1	-18.6	1	0.0678598	0.735	1.8329	1.91834	-8.82818	15	18	12	3UTR		0	0
mmu-miR-8113	NM_026402	Atg3	..(((((.(.(((((((.....&.))))))).).))))).	1895	1917	1	-21.2	1	0.0497283	0.588	-0.329603	-0.0894527	-8.51314	13	17	7	3UTR		0	0
mmu-miR-3473g	NM_026402	Atg3	...(((((((((((((((((&))).)).)))))))))))).	1359	1379	1	-20.4	1	0.0521967	0.735	2.24861	1.6759	-6.51454	17	20	12	3UTR		0	0
mmu-miR-1911-3p	NM_026402	Atg3	.....((((((.(((.((((((&))))))))).)))))).	1460	1477	1	-21	1	0.00233447	0.529	0.251047	0.26204	-17.2455	15	17	9	3UTR		0	0
mmu-miR-12182-3p	NM_026402	Atg3	...(((((((((((((((((((&)))))))))).......))))))))).	1773	1800	1	-19.5	1	0.0320911	0.706	0.222999	-0.0387797	-6.51454	19	27	10	3UTR		0	1
mmu-miR-3083b-5p	NM_026402	Atg3	(((((((((((((.........&))))))))))))).	1548	1562	1	-23.7	1	0.381523	0.441	-0.571433	-0.00580228	-5.76291	13	14	13	3UTR		0	1
mmu-miR-125b-2-3p	NM_001359821	Becn1	(((.(((((((....((((...&))))...))))))).))).	522	541	1	-17.8	1	0.0551491	0.676	4.1022	3.71324	-13.1978	14	19	7	3UTR		0	0
mmu-miR-128-3p	NM_001359821	Becn1	((.(((.(((((.(((((...&))))).)))))))).)).	640	658	1	-18.4	1	0.000156286	0.603	1.33196	0.754332	-8.32793	15	18	8	3UTR		0	0
mmu-miR-201-3p	NM_001359821	Becn1	....(((((((((((..((((((&.))))))..)).))))))))).	575	620	1	-20.5	1	0.00983206	0.5	2.13223	2.46585	-9.77961	17	22	9	3UTR		0	0
mmu-miR-106a-3p	NM_001359821	Becn1	(((.(..((.((((((((.((((&)))).)))))))).))..).))).	713	737	1	-19.1	1	0.000189815	0.672	1.82443	0.473858	-11.6567	18	24	8	3UTR		0	0
mmu-miR-106b-3p	NM_001359821	Becn1	..(((((.....((((((((((&))))))))))...))))).	706	725	1	-21.3	1	0.00135933	0.618	0.182858	0.324694	-15.7411	15	19	10	3UTR		0	0
mmu-miR-18a-3p	NM_001359821	Becn1	...(((((.((((((((((((.&)))))))....................))))).))))).	586	625	1	-24.3	1	0.000978194	0.515	2.03732	2.36821	-7.57093	17	39	7	3UTR		0	0
mmu-miR-22-5p	NM_001359821	Becn1	(.((((((((((((........&.)))))))))))).).	617	637	1	-18.4	1	0.00120592	0.515	0.572731	1.78134	-6.06975	13	16	12	3UTR		0	0
mmu-miR-93-5p	NM_001359821	Becn1	...((((((..(((((((((((.&)))))))).)))...)))))).	597	619	1	-22	1	0.00828244	0.5	3.02825	2.36102	-10.5818	17	22	8	3UTR		0	0
mmu-miR-103-2-5p	NM_001359821	Becn1	.(((((((((.(((.(((((((.&))))))....).)))..))))))))).	610	637	1	-19.1	1	0.00120592	0.515	0.565892	1.27553	-7.35355	19	27	9	3UTR		0	0
mmu-miR-325-5p	NM_001359821	Becn1	(((((((.((.((((((......&.)))))).)))))).))).	580	633	1	-19.1	1	0.000360219	0.529	1.44482	2.39069	-9.07598	15	19	6	3UTR		0	0
mmu-miR-17-5p	NM_001359821	Becn1	...(((((((.((.((((((((.&)))))))).))...))))))).	597	619	1	-21	1	0.00828244	0.5	3.36341	2.38975	-10.1962	17	22	8	3UTR		0	0
mmu-miR-222-5p	NM_001359821	Becn1	((((((((((...........&)))))))))).	621	632	1	-19.9	1	9.57232e-06	0.529	0.552212	1.69516	-13.2236	10	11	10	3UTR		0	0
mmu-miR-125b-1-3p	NM_001359821	Becn1	((((((((((.....((((((.&)))))).....)))))))))).	519	541	1	-22.9	1	0.0551491	0.676	3.8464	3.52882	-12.9906	16	22	10	3UTR		0	0
mmu-miR-378a-3p	NM_001359821	Becn1	.(((((...((((((((((((&)))))))))))).))))).	494	513	1	-19.6	1	0.00609155	0.588	2.64137	3.08269	-8.70704	17	19	12	3UTR		0	0
mmu-miR-133b-5p	NM_001359821	Becn1	(((((((((..(((((((((..&.)))))))))..))))).)))).	678	712	1	-21.8	1	0.00116832	0.618	0.0460607	0.680461	-8.00486	18	23	9	3UTR		0	0
mmu-miR-196b-3p	NM_001359821	Becn1	..((((((((.....(((((..&.)))))....)))))))).	685	729	1	-20.2	1	0.00108374	0.647	0.818969	0.531693	-14.01	13	19	8	3UTR		0	0
mmu-miR-678	NM_001359821	Becn1	.((((((((.((((((((.(((&))).))))))))....)))))))).	565	590	1	-24.2	1	0.00120949	0.632	4.0816	2.86036	-5.03583	19	25	8	3UTR		0	0
mmu-miR-691	NM_001359821	Becn1	.(((((((((((((.(((((..&))))).))))))))))))).	496	516	1	-24.1	1	0.00238714	0.618	2.97366	3.34123	-4.52877	18	20	13	3UTR		0	0
mmu-miR-105	NM_001359821	Becn1	...(((.(((((.(((((.....&.)))))))))).))).	598	626	1	-18.4	1	0.00124023	0.515	3.9749	2.21123	-9.34736	13	16	10	3UTR		0	0
mmu-miR-193b-5p	NM_001359821	Becn1	.((((((..((((((.((((((&)))))).)))))).)))))).	486	507	1	-20.8	1	4.51743e-05	0.588	3.58809	2.57853	-7.3964	18	21	6	3UTR		0	0
mmu-miR-504-3p	NM_001359821	Becn1	.(((((((((((.((((..(..&)..)))).))))))))))).	527	547	1	-21.1	1	0.0494531	0.662	4.24954	3.3603	-5.08246	16	20	11	3UTR		0	0
mmu-miR-511-5p	NM_001359821	Becn1	..(((((((((.(((((((((&))).)).))))))))))))).	702	723	1	-20.2	1	0.000278886	0.632	0.250013	0.415757	-8.3038	18	21	13	3UTR		0	0
mmu-miR-1906	NM_001359821	Becn1	.(((((..(((((((.((((((&)))))))))))))...))))).	500	522	1	-20.4	1	0.000761403	0.603	3.54331	3.37772	-7.8837	18	22	13	3UTR		0	0
mmu-miR-1907	NM_001359821	Becn1	(((.(((.(((((((((((...&))))))))))).)))))).	682	701	1	-19.8	1	0.0344028	0.618	0.458942	0.60659	-9.28323	17	19	11	3UTR		0	0
mmu-miR-1930-5p	NM_001359821	Becn1	..((((.((((((((.(((.((&)).))).))).)))))..)))).	613	636	1	-18.8	1	0.0043767	0.529	0.575011	1.69824	-6.73374	17	23	5	3UTR		0	0
mmu-miR-1947-3p	NM_001359821	Becn1	...((.((.((((((((((((.&))))....)))))))))).)).	610	632	1	-20.7	1	9.57232e-06	0.529	0.434224	1.79468	-9.47189	16	22	10	3UTR		0	0
mmu-miR-1953	NM_001359821	Becn1	......((((((((((((((..&))))).))))))))).	610	626	1	-20.9	0	0.00124023	0.515	0.445509	1.82033	-15.5666	14	16	9	3UTR		0	0
mmu-miR-3061-5p	NM_001359821	Becn1	((((...((.(((((((.((((&)))))))))))))...)))).	500	521	1	-18.1	1	0.000975861	0.603	3.09189	3.35939	-12.7438	17	21	13	3UTR		0	0
mmu-miR-3061-3p	NM_001359821	Becn1	((.(((((((((((((..((((&))))...)).))))))))))))).	712	736	1	-20.4	1	0.000156999	0.662	1.10918	0.487576	-5.49511	19	24	13	3UTR		0	0
mmu-miR-3075-5p	NM_001359821	Becn1	.(((...(((.((((((((((&)))))))))))))...))).	687	707	1	-21.9	1	0.00572245	0.603	0.166443	0.599408	-14.1818	16	20	13	3UTR		0	0
mmu-miR-3961	NM_001359821	Becn1	.((((((((((((......&))))...)))))))).	609	625	1	-19.5	1	0.000978194	0.515	0.598723	1.86445	-5.61866	12	16	8	3UTR		0	0
mmu-miR-3473c	NM_001359821	Becn1	((((((.(((((.((.......&)).)))))...)))))).	617	635	1	-17.7	1	0.0026744	0.515	0.415415	1.28887	-7.00344	13	18	6	3UTR		0	0
mmu-miR-3572-5p	NM_001359821	Becn1	.((((((((((...(((((((.&)))....))))..)))))))))).	522	546	1	-20.2	1	0.0948026	0.662	4.26223	3.44033	-9.2861	17	24	10	3UTR		0	0
mmu-miR-6395	NM_001359821	Becn1	.((((((((..((((.((((..&)))).))))..)))))))).	607	627	1	-22.3	1	4.56356e-05	0.515	0.66507	1.80186	-8.09365	16	20	8	3UTR		0	0
mmu-miR-6398	NM_001359821	Becn1	.(((((((.((((((......&.))))))...))))))).	599	643	1	-17.8	1	0.000841686	0.544	0.593252	1.89112	-5.08276	13	18	7	3UTR		0	0
mmu-miR-378d	NM_001359821	Becn1	.((..(((.(((((((((((((&)))))))))))))....)))..)).	493	518	1	-22.5	1	0.00192817	0.618	2.94472	3.11079	-12.0008	18	25	13	3UTR		0	0
mmu-miR-6541	NM_001359821	Becn1	.(((((((....(((((((..&.)))))))......))))))).	570	605	1	-21.3	1	0.000102053	0.515	4.20472	2.8377	-12.2638	14	22	7	3UTR		0	0
mmu-miR-6905-5p	NM_001359821	Becn1	...(((((((((((((..((.((&)).))..))))))))))))).	522	543	1	-20.5	1	0.0866345	0.676	4.06748	3.58602	-6.51454	17	21	13	3UTR		0	0
mmu-miR-6908-5p	NM_001359821	Becn1	(((((((((((.(((((((...&))))))).))).....)))))))).	693	718	1	-21.7	1	0.000263243	0.647	0.367535	0.352716	-7.28438	18	25	8	3UTR		0	0
mmu-miR-6918-5p	NM_001359821	Becn1	(((((((((((((.((((((...&.)))))))))))))...)))))).	511	552	1	-24.5	1	0.0606404	0.676	4.01756	3.52808	-4.79441	19	24	13	3UTR		0	0
mmu-miR-6922-5p	NM_001359821	Becn1	((((..(((((((((((((((((&))))))))))))))))).)))).	561	584	1	-23.9	1	0.00723933	0.647	4.10815	2.77624	-9.95757	21	23	17	3UTR		0	0
mmu-miR-6944-3p	NM_001359821	Becn1	......(((((((((((((((((&.)))))))).)).))))))).	583	637	1	-26.5	0	0.00120592	0.515	2.29099	2.41763	-15.5666	17	21	8	3UTR		0	0
mmu-miR-6975-5p	NM_001359821	Becn1	(((((((((((..(((((.((..&)).))))).))))))))))).	530	551	1	-23.3	1	0.0586975	0.662	3.96472	3.28592	-8.57351	18	21	11	3UTR		0	0
mmu-miR-6999-3p	NM_001359821	Becn1	((((((..((((((........&))))))..)))))).	618	633	1	-18.8	1	0.000360219	0.529	0.730048	1.847	-8.76339	12	15	6	3UTR		0	0
mmu-miR-6973b-5p	NM_001359821	Becn1	.((((((((((((...(((((...&))))))))))))))))).	517	535	1	-21.3	1	0.0138574	0.691	4.0207	3.62838	-5.61866	17	18	17	3UTR		0	0
mmu-miR-6973b-3p	NM_001359821	Becn1	.(((((((((((((((((..&.)))....)))))....))))))))).	589	637	1	-18.7	1	0.00120592	0.515	2.18558	2.36607	-3.79332	17	27	9	3UTR		0	0
mmu-miR-7041-3p	NM_001359821	Becn1	((((((((((...(((((((&))))))).....)))))))))).	616	639	1	-19.4	1	0.00098987	0.544	0.535797	1.22628	-11.3983	17	23	10	3UTR		0	0
mmu-miR-7042-5p	NM_001359821	Becn1	..((((((((((((((((((.&)))))))))).......)))))))).	499	525	1	-23.2	1	0.000134445	0.618	3.16627	3.32254	-4.957	18	26	10	3UTR		0	0
mmu-miR-7060-5p	NM_001359821	Becn1	...(((((((((.((((((((.&)))))))).))))))))).	535	554	1	-21.6	1	0.0907925	0.662	3.79432	3.34876	-7.80367	17	19	9	3UTR		0	0
mmu-miR-7071-3p	NM_001359821	Becn1	....(((((((((((((.(((&))).))))...))))))))).	626	647	1	-19.6	1	0.000747189	0.544	0.675331	1.0334	-9.54656	16	21	9	3UTR		0	0
mmu-miR-7072-5p	NM_001359821	Becn1	((((((((.((((((((.(((.&))).)))))))).)))))))).	489	511	1	-21.2	1	0.000987571	0.603	4.00816	2.97571	-4.99396	19	22	8	3UTR		0	0
mmu-miR-7087-3p	NM_001359821	Becn1	...(((((((((((((((((..&))))....))).....)))))))))).	612	639	1	-23.9	1	0.00098987	0.544	0.482761	1.69926	-6.51454	17	27	10	3UTR		0	0
mmu-miR-7210-5p	NM_001359821	Becn1	...((((((..((((((((....&.)))))))).)))))).	574	612	1	-18.9	1	0.00689134	0.515	3.35315	2.81213	-10.5818	14	17	8	3UTR		0	0
mmu-miR-7213-3p	NM_001359821	Becn1	(((.(((((((((((((...&))))))))).)))).))).	691	710	1	-18.3	1	0.00244764	0.603	0.528762	0.612746	-6.9696	16	19	9	3UTR		0	0
mmu-miR-7214-5p	NM_001359821	Becn1	.((((((((((((((.(((((((&))))))))))))))..............))))))).	483	519	1	-20.9	1	0.00130268	0.618	3.31222	3.03847	-4.02637	21	36	14	3UTR		0	0
mmu-miR-7224-5p	NM_001359821	Becn1	.(((((..(((((((((....&)))))))))))))).	614	629	1	-21.8	1	3.23959e-05	0.515	0.410853	1.86239	-7.65065	14	15	14	3UTR		0	0
mmu-miR-7661-3p	NM_001359821	Becn1	.(((((((((((..((((((((&.)))..)))))..)))..)))))))).	602	639	1	-24.2	1	0.00098987	0.544	0.448035	1.80802	-5.9393	19	27	8	3UTR		0	0
mmu-miR-7665-5p	NM_001359821	Becn1	(((((((((((((((((((((((&))))))))...))))).........))).))))))).	491	528	1	-19.8	1	0.000531156	0.632	3.45643	3.07438	-3.93757	23	37	8	3UTR		0	0
mmu-miR-7666-5p	NM_001359821	Becn1	(((((((...(((((((((...&))))))))).))))))).	610	628	1	-27.5	1	2.93729e-05	0.515	0.219337	1.8706	-8.55011	16	18	9	3UTR		0	0
mmu-miR-7667-3p	NM_001359821	Becn1	((((((((((((((........&.)))))))))))))).	548	578	1	-23.1	1	0.0253739	0.676	3.80019	3.16793	-4.90607	14	16	14	3UTR		0	0
mmu-miR-7668-3p	NM_001359821	Becn1	(((((.((((((((((((((((&)))))))).))))))))...))))).	561	587	1	-22.9	1	0.00032324	0.632	4.10815	2.77624	-5.83853	21	26	8	3UTR		0	0
mmu-miR-292b-5p	NM_001359821	Becn1	((((......(((((((((((((&)))))))))))))...)))).	716	737	1	-20	1	0.000189815	0.672	1.45824	0.52246	-16.1138	17	21	13	3UTR		0	0
mmu-miR-1191b-3p	NM_001359821	Becn1	.(((((.((..(((((((.((.&.))..)))))))..)).))))).	598	638	1	-24.8	1	0.00109724	0.529	3.45428	2.1312	-9.40429	16	23	7	3UTR		0	0
mmu-miR-7687-3p	NM_001359821	Becn1	((.((((((.((((((((.((&.)).)))...).)))).)))))))).	601	634	1	-23.5	1	0.00102738	0.529	1.202	1.9732	-6.73762	18	26	8	3UTR		0	0
mmu-miR-8113	NM_001359821	Becn1	((((((((((((((((......&))))))))))))).))).	687	705	1	-19.5	1	0.0116343	0.618	0.607737	0.600434	-3.93757	16	18	13	3UTR		0	0
mmu-miR-8114	NM_001359821	Becn1	..(((((((((((((((((((&))))....).))))).....))))))))).	620	650	1	-23.2	1	0.000278331	0.544	0.717785	1.51253	-4.957	19	30	9	3UTR		0	0
mmu-miR-9768-3p	NM_001359821	Becn1	..((.(((((((...(((((((..&))))))).))))))).)).	620	639	1	-23.4	1	0.00098987	0.544	0.69878	1.73312	-11.9575	16	19	7	3UTR		0	0
mmu-miR-9-5p	NM_019584	Becn1	(((((.(((((((((((((.((.&)).)))))))))))))..))))).	1869	1893	1	-19.6	1	0.000383686	0.485	3.25134	2.70646	-5.83853	20	24	13	3UTR		0	0
mmu-miR-145a-5p	NM_019584	Becn1	((((..((((((((.(...(((.&)))...).)))))))))))).	1878	1899	1	-21.9	1	0.00123129	0.456	2.07067	2.40702	-10.693	16	21	12	3UTR		0	0
mmu-miR-149-3p	NM_019584	Becn1	((((((((((((((((((((..&.)))..))))).))..))))).))))).	1686	1725	1	-26.6	1	0.386311	0.603	2.45597	2.76279	-3.93757	20	28	5	3UTR		0	0
mmu-miR-185-5p	NM_019584	Becn1	(((((..(((.(((((((((((&)))))))))))...)))..))))).	1904	1929	1	-20	1	0.0150757	0.5	0.697716	1.96602	-10.207	19	25	11	3UTR		0	0
mmu-miR-187-5p	NM_019584	Becn1	(((((.((((.(..(((((((.&)))))))..).))))..))))).	1899	1922	1	-22	1	0.0053938	0.5	3.79432	2.18045	-10.8093	17	23	7	3UTR		0	0
mmu-miR-200b-5p	NM_019584	Becn1	..((((((((((((((((.(((&.))).)))))))))))))))).	1924	1973	1	-28.7	1	4.02209e-05	0.529	0.885658	0.968762	-4.957	19	22	16	3UTR		0	0
mmu-miR-204-5p	NM_019584	Becn1	((((((.((((((((..((((.&)))).......)))))))).)))))).	1867	1894	1	-22.9	1	0.000300307	0.485	2.69652	2.702	-5.71431	18	27	8	3UTR		0	0
mmu-miR-290a-3p	NM_019584	Becn1	...(((((((((.((((((((((.&)))))))))).))......))))))).	1846	1873	1	-21.8	1	0.00229518	0.5	3.90923	3.33619	-7.80367	19	27	10	3UTR		0	0
mmu-miR-208a-5p	NM_019584	Becn1	.(((((((((((((((((....&.))).)))))))))))))).	1864	1914	1	-26.2	1	4.3752e-05	0.471	3.70312	2.77418	-3.79332	17	20	14	3UTR		0	1
mmu-let-7b-5p	NM_019584	Becn1	.((((....(((.(((((((..&))))))).)))...)))).	1706	1725	1	-18.4	1	0.386311	0.603	3.05884	2.37736	-11.8971	14	19	7	3UTR		0	0
mmu-let-7e-5p	NM_019584	Becn1	(((((((((((((((.......&.))))))))))).)))).	1795	1830	1	-20	1	0.0490206	0.647	2.81378	3.29126	-4.17062	15	18	11	3UTR		0	0
mmu-miR-26b-3p	NM_019584	Becn1	(((.(((((((((((((((((.&)))))))))))).))))).))).	1874	1897	1	-21.1	1	0.000374222	0.471	2.51298	2.49202	-6.9696	20	23	12	3UTR		0	0
mmu-miR-211-5p	NM_019584	Becn1	((((((.((((((((..((((.&)))).......)))))))).)))))).	1867	1894	1	-22.9	1	0.000300307	0.485	2.69652	2.702	-5.71431	18	27	8	3UTR		0	0
mmu-miR-378a-5p	NM_019584	Becn1	((((((((((...(((((....&.)))))...)))))))))).	1868	1912	1	-26.1	1	4.31365e-05	0.471	2.68626	2.65575	-11.3983	15	20	10	3UTR		0	0
mmu-miR-468-3p	NM_019584	Becn1	...(((((.(((((..((((((.&)))))).....)))))))))).	1857	1879	1	-18.1	1	0.00264006	0.471	4.19104	3.17338	-8.53943	16	22	10	3UTR		0	0
mmu-miR-301b-5p	NM_019584	Becn1	.((((..(((.(((((((.((.&))))))))).))))))).	1994	2012	1	-19.3	1	0.00890714	0.662	1.23816	0.489628	-10.0627	16	18	9	3UTR		0	0
mmu-miR-670-3p	NM_019584	Becn1	(((((((((((.(((((((..((((&.))))..)))))))))))))))))).	1859	1895	1	-25	1	0.000257361	0.471	3.25708	2.75049	-7.28438	22	26	18	3UTR		0	0
mmu-miR-674-3p	NM_019584	Becn1	((((((((.(((((((((....&))))))))).)).))).))).	1848	1869	1	-20.1	1	0.00144217	0.544	4.53303	3.26505	-4.99396	17	21	9	3UTR		0	0
mmu-miR-680	NM_019584	Becn1	.(((((((((((((((((.(.&).)))))).)))))..))....)))).	1663	1690	1	-21	1	0.0178819	0.529	2.75014	3.15531	-3.79332	18	27	6	3UTR		0	0
mmu-miR-499-3p	NM_019584	Becn1	..(((((((..(((.(.((((((&)))))).).))).))))))).	1867	1888	1	-20.7	1	0.000606232	0.471	2.58659	2.73765	-9.75973	17	21	7	3UTR		0	0
mmu-miR-702-3p	NM_019584	Becn1	.((((..(((((.((((((((.&)).))))))))))).....)))).	1882	1906	1	-22.2	1	0.000133577	0.441	1.97947	2.59393	-8.5271	17	24	11	3UTR		0	0
mmu-miR-709	NM_019584	Becn1	..((((((..((((((((.&)))))))).)))))).	1950	1966	1	-23.8	1	0.00308174	0.529	-0.176237	0.564524	-7.2559	14	16	8	3UTR		0	0
mmu-miR-1894-3p	NM_019584	Becn1	...((((((((((((..(((..&.)))....)))))))))))).	1682	1724	1	-25	1	0.373984	0.603	2.91942	2.66977	-6.74759	15	21	12	3UTR		0	0
mmu-miR-1960	NM_019584	Becn1	.((((((((..((..((((((.&)))))).))..)))))))).	1927	1947	1	-20.5	1	0.0117742	0.515	1.44482	0.775877	-9.4529	16	20	8	3UTR		0	0
mmu-miR-1971	NM_019584	Becn1	......((.((((((((.&))))))))...)).	1699	1713	1	-18.2	0	0.124176	0.544	3.03524	2.4095	-16.6229	10	14	8	3UTR		0	1
mmu-miR-3057-3p	NM_019584	Becn1	(((((((.((((((((......&))))))))..))))))).	1874	1892	1	-24.1	1	0.000307854	0.471	3.40445	2.76904	-6.25121	15	18	8	3UTR		0	0
mmu-miR-3064-5p	NM_019584	Becn1	(((.(((((((((((((((...&)))))))))).)))))..))).	1660	1682	1	-22	1	0.0112508	0.529	2.87487	3.31845	-6.9696	18	22	10	3UTR		0	0
mmu-miR-3109-3p	NM_019584	Becn1	..(((.((((((((((((((.&))))).)))))))))))).	1847	1866	1	-18.9	1	0.00119226	0.574	4.22113	3.0549	-6.85796	17	19	12	3UTR		0	0
mmu-miR-5110	NM_019584	Becn1	(.(((((((.(((((.(((((((((&.))))))))).))))).))))))).).	1791	1825	1	-27.6	1	0.147287	0.647	2.53896	3.08721	-6.57681	22	27	9	3UTR		0	0
mmu-miR-5110	NM_019584	Becn1	((((((((.((((((((((((....&.)))).)))))))).)))))))).	1691	1729	1	-27.1	1	0.677047	0.632	2.71519	2.5171	-4.99396	20	24	8	3UTR		0	0
mmu-miR-3572-3p	NM_019584	Becn1	.((.((((.(((((((((((((.&)))))))))).....))).)))).)).	1886	1913	1	-23.1	1	4.08014e-05	0.471	2.76834	2.4809	-7.88174	19	27	10	3UTR		0	0
mmu-miR-5128	NM_019584	Becn1	....((((((((((((((((((.&))))...))))).).)))))))).	1686	1710	1	-25.3	1	0.117267	0.544	2.50854	2.68159	-9.54656	18	24	8	3UTR		0	0
mmu-miR-5616-5p	NM_019584	Becn1	(((((((.((((((..(....&)..)))))).))))))).	1877	1895	1	-17.7	1	0.000257361	0.471	1.83616	2.38043	-7.21971	14	18	7	3UTR		0	0
mmu-miR-5620-5p	NM_019584	Becn1	....(((((((.(((((.(((((&))))))))))..))))))).	1670	1690	1	-24.4	1	0.0178819	0.529	3.23761	2.98012	-12.8934	17	20	10	3UTR		0	0
mmu-miR-3073b-3p	NM_019584	Becn1	((.((((((((((((.((((..&))))..)))))))))....))).)).	1865	1891	1	-23.3	1	0.000283465	0.471	3.04022	2.70637	-5.72816	18	26	9	3UTR		0	0
mmu-miR-6388	NM_019584	Becn1	.(((((((((((((.(((((.&)))))))))))))))).)).	1949	1969	1	-28.1	1	5.1153e-05	0.544	-0.0516521	0.540927	-4.52877	18	20	16	3UTR		0	0
mmu-miR-6391	NM_019584	Becn1	.(((((((((((((.((....&))))))))))))).)).	1948	1965	1	-22.7	1	0.00164277	0.529	0.0362896	0.628135	-4.52877	15	17	13	3UTR		0	0
mmu-miR-6404	NM_019584	Becn1	(((((((((....((((((((&))))))))....))))))))).	1803	1825	1	-20.1	1	0.147287	0.647	3.97681	3.62863	-12.6408	17	22	9	3UTR		0	0
mmu-miR-6409	NM_019584	Becn1	(((((((((((((((((((((((&.)))))).)))..........)))))))))))))).	1888	1941	1	-28.3	1	3.02234e-05	0.5	1.72546	2.24098	-3.93757	23	36	14	3UTR		0	0
mmu-miR-6418-5p	NM_019584	Becn1	(((((((((((((((.(((((&))))).))))))).)))))))).	1710	1733	1	-26.9	1	0.162927	0.632	1.8352	2.29592	-4.17062	20	23	8	3UTR		0	0
mmu-miR-6418-3p	NM_019584	Becn1	..((((((((((((((((((.(&).)))))))))))...........).)))))).	1884	1917	1	-22.3	1	0.000351253	0.471	1.9284	2.38753	-4.957	19	33	11	3UTR		0	0
mmu-let-7k	NM_019584	Becn1	(((((((((((((((.(.(&.).).))))))))))).)))).	1794	1830	1	-19.6	1	0.0490206	0.647	3.2699	3.33721	-4.17062	17	22	11	3UTR		0	0
mmu-miR-6902-5p	NM_019584	Becn1	(((((((((((((((((.....&)))))))............)))))))))).	1864	1894	1	-20.4	1	0.000300307	0.485	3.0358	2.43766	-3.93757	17	30	10	3UTR		0	0
mmu-miR-6904-5p	NM_019584	Becn1	...(((((((.(((((((((((&))))....)))))))))))))).	1687	1710	1	-20.8	1	0.117267	0.544	2.59274	2.7049	-9.33931	18	23	14	3UTR		0	0
mmu-miR-6909-3p	NM_019584	Becn1	..(((..((((((((((((((.&))))))...)))...)))))..))).	1884	1910	1	-24.8	1	9.26486e-05	0.471	2.55493	2.44926	-8.40165	17	26	6	3UTR		0	0
mmu-miR-6916-5p	NM_019584	Becn1	.(((((.((((.(.(((((((&))))))).).)))).).)))).	1696	1718	1	-21.3	1	0.20666	0.574	2.21939	2.5061	-9.54065	17	22	7	3UTR		0	0
mmu-miR-6916-5p	NM_019584	Becn1	.((((((((((((.((((...&)))).)))))))))).)).	1918	1937	1	-20.2	1	0.000801898	0.5	0.441722	1.2468	-4.65016	16	19	10	3UTR		0	0
mmu-miR-6922-5p	NM_019584	Becn1	.(.(((((((((.((((..(.((&)))..))))))))))))).).	1704	1725	1	-20.1	1	0.386311	0.603	1.14656	2.17362	-6.63999	17	21	13	3UTR		0	0
mmu-miR-6923-5p	NM_019584	Becn1	((((((((.((((((((..(((((&))))).)))).................)))))))))))).	1896	1936	1	-25.8	1	0.000807503	0.485	0.836205	1.87881	-4.99396	21	40	12	3UTR		0	0
mmu-miR-6924-5p	NM_019584	Becn1	.((((((((((((((.((((...&.))))))))....)))))))))).	1897	1934	1	-20.8	1	0.00885353	0.485	1.02188	1.95268	-4.02637	18	24	10	3UTR		0	0
mmu-miR-6942-5p	NM_019584	Becn1	((((((((((((((.......&)))))))))).)))).	1716	1732	1	-18.7	1	0.178155	0.647	1.68416	2.32402	-4.90607	14	16	10	3UTR		0	0
mmu-miR-3547-5p	NM_019584	Becn1	..(((((((((((((((((..(((.&))).))))))).........)))))))))).	1699	1730	1	-31.2	1	0.668976	0.632	1.97943	2.50797	-4.957	20	31	10	3UTR		0	0
mmu-miR-6967-5p	NM_019584	Becn1	..(((((((((((((.(((((&))))).))))))))))))).	1795	1815	1	-23.6	1	0.138478	0.662	3.31512	3.40085	-5.19005	18	20	13	3UTR		0	0
mmu-miR-6971-5p	NM_019584	Becn1	.((((((((((((((.((((&)))).).))))))))))))).	1702	1723	1	-27.2	1	0.365059	0.603	1.77465	2.30192	-4.02637	18	21	13	3UTR		0	0
mmu-miR-6976-5p	NM_019584	Becn1	..(((((((((((((((......&)).))))))))))))).	1806	1823	1	-23.1	1	0.156306	0.662	3.64138	3.54349	-4.957	15	17	13	3UTR		0	0
mmu-miR-6976-5p	NM_019584	Becn1	((((((((..(((((((......&)))))))...)))))))).	1713	1732	1	-20.4	1	0.178155	0.647	2.22443	2.45449	-6.23647	15	19	8	3UTR		0	0
mmu-miR-6978-5p	NM_019584	Becn1	..(((((..(((.(((((((((.&))))..)))))..))).))))).	1686	1709	1	-21.3	1	0.110328	0.559	2.42859	2.77307	-9.61616	17	23	5	3UTR		0	0
mmu-miR-6995-3p	NM_019584	Becn1	.((((((..((((((((((..&.))))...)))))).)))))).	1863	1901	1	-20.5	1	0.00199799	0.456	3.93322	2.84497	-7.16335	16	22	6	3UTR		0	0
mmu-miR-6973b-5p	NM_019584	Becn1	.((((...(((((((((((((((.&))).))..))))))))))....)))).	1705	1732	1	-25.4	1	0.178155	0.647	1.83773	2.32931	-9.55161	19	27	10	3UTR		0	0
mmu-miR-7003-5p	NM_019584	Becn1	.((((((.(((((((.(((((&))))).))))))).......)))))).	1684	1711	1	-22.4	1	0.110019	0.544	2.65722	2.81613	-6.34001	18	27	7	3UTR		0	0
mmu-miR-7003-3p	NM_019584	Becn1	.(((((((((((((((((.&.)))))))))..))).))))).	1873	1905	1	-28.3	1	0.00018097	0.456	2.58366	2.38532	-3.79332	17	22	9	3UTR		0	0
mmu-miR-7006-5p	NM_019584	Becn1	(((((.((.(((((((((((.(...&.).))).))))))))..)).))))).	1669	1710	1	-25.3	1	0.117267	0.544	3.25798	3.27275	-6.89492	19	26	8	3UTR		0	0
mmu-miR-7009-3p	NM_019584	Becn1	((((((((((((.(((.((..&)).))).))...)))))))))).	1875	1898	1	-23.6	1	0.000643753	0.471	1.85726	2.45234	-5.22671	17	23	10	3UTR		0	0
mmu-miR-7010-5p	NM_019584	Becn1	.(((((((((((((........&.))))...))))))))).	1691	1722	1	-19.4	1	0.380955	0.603	2.78945	2.56999	-4.76182	13	18	9	3UTR		0	0
mmu-miR-7011-5p	NM_019584	Becn1	(((((((.(((((((((..((((&)))).))))))))))))).))).	1708	1731	1	-22.5	1	0.203179	0.632	1.14656	2.17362	-6.25121	20	23	13	3UTR		0	0
mmu-miR-7012-5p	NM_019584	Becn1	..((((((((((((((((((...&.))))))))....................)).)))))))).	1650	1722	1	-27.1	1	0.380955	0.603	3.21411	3.08899	-4.957	18	41	8	3UTR		0	0
mmu-miR-7034-3p	NM_019584	Becn1	((((((((((((((((((((((..&.))))....)))))))).)))....))))))).	1864	1909	1	-25.9	1	0.000102426	0.471	2.95235	2.40175	-3.93757	22	33	8	3UTR		0	0
mmu-miR-7040-5p	NM_019584	Becn1	.....((((((((((((.(((.&)))))).......))))))))).	1703	1726	1	-21.2	1	0.396964	0.618	1.89311	2.43525	-13.6656	15	23	9	3UTR		0	0
mmu-miR-7042-5p	NM_019584	Becn1	...((((((((.(.((((...&))))..).)))))))).	1949	1966	1	-19.5	1	0.00308174	0.529	0.429096	0.48655	-10.7182	13	17	8	3UTR		0	0
mmu-miR-7043-5p	NM_019584	Becn1	...((.((((.((((((((((..&))))))))).).)))).)).	1945	1965	1	-20.4	1	0.00164277	0.529	0.593252	0.784085	-11.2403	16	20	9	3UTR		0	0
mmu-miR-7045-5p	NM_019584	Becn1	.(((((((((((.((((....&.)))).))))))))))).	1916	1940	1	-24.3	1	9.8978e-05	0.5	0.58579	1.35761	-5.08246	15	18	11	3UTR		0	0
mmu-miR-7047-5p	NM_019584	Becn1	.(((((((((((((((((((.((&.)).))))))))))......)))..)))))).	1666	1725	1	-30.4	1	0.386311	0.603	2.80128	3.06616	-3.79332	21	32	10	3UTR		0	0
mmu-miR-7048-5p	NM_019584	Becn1	.(((((((((.(((.(((....&.))))))..........))))))))).	1651	1709	1	-23.7	1	0.110328	0.559	2.60066	3.22918	-7.35355	15	27	9	3UTR		0	1
mmu-miR-7056-5p	NM_019584	Becn1	.(((.((((((..((((((((.&))))))))...)))))).))).	1805	1827	1	-23.6	1	0.119491	0.662	3.64138	3.56731	-12.5483	17	22	8	3UTR		0	0
mmu-miR-7058-5p	NM_019584	Becn1	.((((((((((.((.(((((..((&)).)))))..)))))))))))).	1703	1726	1	-21.4	1	0.396964	0.618	1.29028	2.19113	-7.87558	19	23	12	3UTR		0	0
mmu-miR-7063-5p	NM_019584	Becn1	..(((((((((((((((((((..&.)).)))))))...)))).)))))).	1685	1721	1	-26	1	0.371945	0.588	2.58486	2.6786	-4.957	19	26	7	3UTR		0	0
mmu-miR-7070-5p	NM_019584	Becn1	..((((((((((((((((((.&))))))...........)))))............))))))).	1683	1725	1	-25.2	1	0.386311	0.603	2.24396	2.7428	-4.957	18	42	7	3UTR		0	0
mmu-miR-7081-3p	NM_019584	Becn1	((((((((((.(((((((((((&))))))))..))).))))))...)))).	1884	1912	1	-27.1	1	4.31365e-05	0.471	1.63502	2.38668	-6.76235	21	28	8	3UTR		0	0
mmu-miR-7082-5p	NM_019584	Becn1	......(((((((((((((((&.))))))))))).)))).	1706	1732	1	-22.9	0	0.178155	0.647	1.74039	2.25002	-15.5666	15	18	11	3UTR		0	0
mmu-miR-7082-5p	NM_019584	Becn1	.((((((((((((.(((((((&)).))))).................)))))))).)))).	1925	1964	1	-21.9	1	0.00137922	0.515	0.0818388	0.608642	-4.65016	19	39	8	3UTR		0	0
mmu-miR-7115-3p	NM_019584	Becn1	(((((((..(((..(((((((.&)))))))..)))..))))))).	1884	1906	1	-26.6	1	0.000133577	0.441	1.60165	2.52826	-9.45357	17	22	7	3UTR		0	0
mmu-miR-7118-5p	NM_019584	Becn1	(.(((((((.(((((((((...&.))))))))).))))))).).	1692	1733	1	-25.9	1	0.162927	0.632	3.31341	2.56144	-6.34376	17	21	9	3UTR		0	0
mmu-miR-7118-5p	NM_019584	Becn1	..((((((..((((((((....&))))))))..)))))).	1806	1823	1	-21.3	1	0.156306	0.662	3.18056	3.53264	-7.2559	14	17	8	3UTR		0	0
mmu-miR-7217-5p	NM_019584	Becn1	((((((((.(((.(((..(......&)..))).))).)))))))).	1901	1921	1	-17	1	0.000331219	0.5	0.439353	1.89523	-6.28309	15	20	8	3UTR		0	0
mmu-miR-7217-3p	NM_019584	Becn1	.......(((((((((......&))))))))).	1860	1870	1	-15.1	0	0.00168718	0.544	4.50567	3.01239	-17.1102	9	10	9	3UTR		0	0
mmu-miR-7218-5p	NM_019584	Becn1	(((((((...(((..((((((&))))))..)))))))))).	1807	1826	1	-18.7	1	0.121922	0.647	4.24193	3.63704	-10.1424	16	19	10	3UTR		0	0
mmu-miR-7218-5p	NM_019584	Becn1	.(((((((((..(((......&)))..))))))))).	1674	1689	1	-18.2	1	0.0182726	0.529	3.21046	3.05127	-10.198	12	15	9	3UTR		0	0
mmu-miR-7229-5p	NM_019584	Becn1	..((((((((((((....(((&))).....)))))))))))).	1507	1528	1	-20.9	1	0.000109591	0.632	4.62344	4.18473	-5.9255	15	21	12	3UTR		0	0
mmu-miR-7230-3p	NM_019584	Becn1	(((((((((((((((..(((((.&))))).))))))))))))))).	1683	1705	1	-22.7	1	0.0849284	0.544	2.64025	2.5969	-4.17062	20	22	15	3UTR		0	0
mmu-miR-7236-3p	NM_019584	Becn1	((((((.((((((.........&)))))).)))))).	1954	1968	1	-16.8	1	4.98599e-05	0.529	-0.254895	0.456796	-7.3066	12	14	6	3UTR		0	0
mmu-miR-7665-5p	NM_019584	Becn1	..(((((((.(((.((((((.((&.)).)))))))))))))))).	1701	1731	1	-21.5	1	0.203179	0.632	1.06672	2.19055	-7.05635	18	21	16	3UTR		0	0
mmu-miR-7676-3p	NM_019584	Becn1	(((((((.((.((.(.((((((&.)))))).).))))))))))).	1877	1905	1	-25.5	1	0.00018097	0.456	1.5313	2.29228	-10.1659	18	22	11	3UTR		0	0
mmu-miR-7687-3p	NM_019584	Becn1	((((...(((((((.((((((&))))))........))))))))))).	1864	1890	1	-22.6	1	0.000288684	0.456	3.2315	2.69072	-12.2367	17	26	11	3UTR		0	0
mmu-miR-8099	NM_019584	Becn1	.(((((((.((((((((.(((&))).)))))))).)...........................)))))).	1710	1758	1	-19.6	1	0.0509508	0.735	1.11662	2.1656	-4.84971	18	48	8	3UTR		0	0
mmu-miR-8101	NM_019584	Becn1	((((((((...((.(((((((.&))))))).))...)))))))).	1507	1529	1	-27.8	1	0.000121235	0.632	5.48552	4.23076	-9.91808	17	22	8	3UTR		0	0
mmu-miR-8106	NM_019584	Becn1	.....(((((((((((......&.))))))))))).	1658	1676	1	-17.9	1	0.0138346	0.588	3.36165	3.40884	-13.6656	11	13	11	3UTR		0	0
mmu-miR-8107	NM_019584	Becn1	(.((((((.(((((.(((...&))).))))))))))).).	1682	1700	1	-18.7	1	0.040244	0.515	2.96099	2.75883	-6.89309	15	18	11	3UTR		0	1
mmu-miR-8113	NM_019584	Becn1	((((((((.(((((((.(((..&)))..))))).))............)))))))).	1698	1732	1	-20.3	1	0.178155	0.647	2.22443	2.45449	-4.99396	18	34	8	3UTR		0	0
mmu-miR-1271-3p	NM_019584	Becn1	...(((((((((((((((.....&.))))))))))).)))).	1860	1883	1	-25.4	1	0.000219235	0.471	4.1329	2.85592	-6.51454	15	18	11	3UTR		0	0
mmu-miR-12184-5p	NM_019584	Becn1	..((((((.(((((((((.((.&)))))))..........)))))))))).	1686	1714	1	-22.3	1	0.16386	0.559	2.5002	2.6845	-6.01339	17	28	10	3UTR		0	0
mmu-miR-12186-3p	NM_019584	Becn1	.(((((((((((((((((...&.)))))).))))))...))))).	1873	1916	1	-24.6	1	4.36585e-05	0.485	2.39898	2.39558	-3.79332	17	23	6	3UTR		0	0
mmu-miR-12190-3p	NM_019584	Becn1	(((.(.((((((((((..&)))))))))).).))).	1652	1669	1	-17.3	1	0.0344967	0.632	4.30573	3.52452	-8.87056	14	17	10	3UTR		0	0
mmu-let-7i-3p	NM_026217	Atg12	(((.(((((((((((((.....&)).))))))))..))).))).	2224	2245	1	-21.9	1	0.00108194	0.559	3.16596	3.38731	-6.9696	16	21	8	3UTR		0	0
mmu-miR-23b-5p	NM_026217	Atg12	..((((((((((((((((...&))))))))))..................)))))).	2174	2209	1	-22.7	1	0.0355938	0.485	3.21905	3.63381	-4.957	16	35	10	3UTR		0	0
mmu-miR-29b-1-5p	NM_026217	Atg12	..(((.(((((((((((((((.&)))))...))))))))))))).	2071	2093	1	-21	1	0.000146693	0.456	3.89835	3.28297	-6.85796	18	22	13	3UTR		0	0
mmu-miR-125a-3p	NM_026217	Atg12	(((((((((((((((.(((((.&)))))..)))))))))).)).))).	2062	2087	1	-26.7	1	0.000149278	0.485	3.65091	3.16945	-4.17062	20	25	10	3UTR		0	0
mmu-miR-127-5p	NM_026217	Atg12	.((.((((((((((((((((..&)).))))))).))))))).)).	1447	1469	1	-21.6	1	0.000335694	0.529	-0.235811	0.051067	-6.82535	18	22	7	3UTR		0	0
mmu-miR-130a-5p	NM_026217	Atg12	((((((((((((((.(((((..&)))).).))))))....)))))))).	2050	2076	1	-19.3	1	2.9518e-05	0.529	3.84847	2.74473	-4.67302	19	26	8	3UTR		0	0
mmu-miR-130a-5p	NM_026217	Atg12	.(((((((((((..(((((...&)))))))))))))))).	514	531	1	-18.1	1	0.00108835	0.632	0.273028	0.0506824	-5.9393	16	17	16	3UTR		0	0
mmu-miR-133a-3p	NM_026217	Atg12	...((((((((......(((..&))).....)))))))).	838	855	1	-19.1	1	0.00837886	0.706	0.635546	0.154959	-12.9758	11	17	8	3UTR		0	0
mmu-miR-141-5p	NM_026217	Atg12	(((((((((((((((((((...&)))).)))........)))))))))))).	1036	1065	1	-22.3	1	0.00757372	0.574	0.0399598	0.283652	-3.93757	19	29	12	3UTR		0	0
mmu-miR-150-3p	NM_026217	Atg12	.((((.(((((((((((((...&)))))))))))))...)))).	1403	1424	1	-23.8	1	4.56407e-05	0.544	0.180791	0.019564	-5.69428	17	21	13	3UTR		0	0
mmu-miR-154-5p	NM_026217	Atg12	((((((....((.(((((((((&))))))))).)).....)))))).	987	1011	1	-20.7	1	0.00430056	0.559	0.532771	0.142895	-11.3829	17	24	9	3UTR		0	0
mmu-miR-10b-5p	NM_026217	Atg12	..(((((((..(((....((((.&.))))...)))..))))))).	2177	2206	1	-19.4	1	0.015395	0.441	3.09403	3.34724	-9.99278	14	21	7	3UTR		0	0
mmu-miR-182-3p	NM_026217	Atg12	..((((((((.((((((..(.&)..)))))).)))..))))).	988	1009	1	-19.5	1	0.00143839	0.559	0.632866	0.249468	-7.78178	15	21	6	3UTR		0	0
mmu-miR-185-3p	NM_026217	Atg12	...((((((((.(((((((.(&).))))))).)))))))).	928	947	1	-22.9	1	5.90018e-06	0.515	0.313815	0.438486	-9.86134	16	19	8	3UTR		0	1
mmu-miR-186-3p	NM_026217	Atg12	(((((((((((..(((((((((&))))))))).))))))).............)))).	2250	2285	1	-17.7	1	0.017149	0.618	3.59082	2.55796	-8.57351	20	35	9	3UTR		0	0
mmu-miR-186-3p	NM_026217	Atg12	.(((((((((((..........&)))))).))))).	1907	1920	1	-16.5	1	1.27336e-05	0.559	0.379783	0.191801	-6.90779	11	13	6	3UTR		0	0
mmu-miR-188-3p	NM_026217	Atg12	..(((((.((((((((.(((.&))).))))))))))).)).	2177	2196	1	-23.7	1	2.50852e-07	0.456	3.38822	3.34314	-7.27064	16	19	11	3UTR		0	1
mmu-miR-193a-5p	NM_026217	Atg12	..(((((((((((((.((((..&))))))))............))))))))).	1702	1732	1	-19.4	1	0.00263165	0.515	-0.167143	-0.0616483	-5.19005	17	30	9	3UTR		0	0
mmu-miR-193a-3p	NM_026217	Atg12	...(((((((((.((((.....&.)))).))))))))).	1865	1893	1	-19.1	1	0.000266383	0.529	0.722704	0.145039	-7.80367	13	16	9	3UTR		0	0
mmu-miR-195a-3p	NM_026217	Atg12	.((((.((((..((((((((..&))))))))..)))).)))).	1827	1847	1	-20	1	0.00207123	0.529	-0.115891	0.161873	-11.8659	16	20	8	3UTR		0	0
mmu-miR-199a-5p	NM_026217	Atg12	.((.(.(((((..((.(((((((&))))))).))..)))))).)).	1212	1234	1	-20.4	1	0.016128	0.471	0.377013	-0.0119391	-13.5953	17	22	7	3UTR		1	0
mmu-miR-199a-3p	NM_026217	Atg12	...((((((((((((.......&.)))))))))))).	1878	1894	1	-18	1	0.000123417	0.544	-0.193829	0.174967	-6.74759	12	14	12	3UTR		0	0
mmu-miR-200b-5p	NM_026217	Atg12	(((((((((((((((..(((((&.)))))..)))))))))))..)))).	2304	2354	1	-18.8	1	0.000473384	0.662	1.35477	2.05688	-4.17062	20	26	11	3UTR		0	0
mmu-miR-204-5p	NM_026217	Atg12	...(((((((((((((..((((&))))...)))))))).))))).	732	754	1	-20.8	1	0.000146784	0.574	-0.0634546	-0.0380796	-6.51454	17	22	8	3UTR		0	0
mmu-miR-205-3p	NM_026217	Atg12	(((..((((..(((((((((((&)))))))))))..)))).))).	1449	1471	1	-20.3	1	0.00079128	0.529	-0.357679	0.0376615	-15.1559	18	22	11	3UTR		0	0
mmu-miR-206-3p	NM_026217	Atg12	((((((...(((.(((((((((&)))))))))))))))))).	674	693	1	-24.4	1	0.000112663	0.529	-0.0451544	-0.139291	-10.1404	18	19	18	3UTR		0	0
mmu-miR-143-5p	NM_026217	Atg12	((((((..((((((.((((((&))))))..))))))..)))))).	2001	2024	1	-31.3	1	0.000111303	0.441	0.598005	1.3543	-8.53035	18	23	6	3UTR		0	0
mmu-miR-143-3p	NM_026217	Atg12	.((((((((((((((((.(..&).)))))))))......))))))).	2115	2140	1	-18.8	1	0.000524695	0.471	4.08463	3.52368	-3.79332	17	25	9	3UTR		0	0
mmu-miR-290a-5p	NM_026217	Atg12	.((((.(((.((((((((....&.)))))))).)))..)))).	1724	1764	1	-21.3	1	0.00211214	0.456	-0.115892	0.0580618	-6.93679	15	20	8	3UTR		0	0
mmu-miR-290a-5p	NM_026217	Atg12	((((((((((..(((((((...&.))))))))))))))))).	1353	1372	1	-19	1	0.0452866	0.662	0.171717	0.112062	-10.1092	17	19	17	3UTR		0	0
mmu-miR-291a-3p	NM_026217	Atg12	..((((((.(((...(((((((&)))))))))).)))))).	1819	1837	1	-22.1	1	0.00222808	0.544	0.409178	0.128205	-8.89481	16	18	10	3UTR		0	0
mmu-miR-294-5p	NM_026217	Atg12	.(((.(((((((((((((....&.)))).)))))))))))).	820	865	1	-21.5	1	0.00126512	0.691	0.101242	0.116754	-7.91236	16	19	12	3UTR		0	1
mmu-miR-294-5p	NM_026217	Atg12	.(((((((((.(((((((....&))))))).))))))))).	805	823	1	-21.1	1	0.00232098	0.691	0.0680467	0.176408	-6.6181	16	18	9	3UTR		0	1
mmu-miR-295-5p	NM_026217	Atg12	.((((.(((((((((((((((.&)))))))))))).............))).)))).	2056	2090	1	-20.9	1	0.000297335	0.456	3.93368	2.67759	-5.69428	19	34	12	3UTR		0	0
mmu-miR-296-3p	NM_026217	Atg12	(.(((((((((((.((((.(((&))).))))...).))))))))))).	1769	1794	1	-26.6	1	0.10833	0.471	0.336138	0.0823783	-5.95809	19	25	11	3UTR		0	0
mmu-miR-298-5p	NM_026217	Atg12	((((((((((((((((((.....&))))).))))).))))....)))).	2160	2185	1	-26.9	1	4.21411e-06	0.485	2.88019	3.49554	-3.93757	18	25	5	3UTR		0	0
mmu-miR-302a-3p	NM_026217	Atg12	..((((((.((((((....(((.&))))))))).)))))).	1820	1837	1	-18.9	1	0.00222808	0.544	0.311201	0.101083	-6.24644	15	17	9	3UTR		0	0
mmu-let-7d-3p	NM_026217	Atg12	.....((((..(((((((((..&)))))))))..)))).	932	948	1	-19.1	1	4.25021e-06	0.515	0.240829	0.440497	-17.7329	13	16	9	3UTR		0	0
mmu-miR-106b-3p	NM_026217	Atg12	..(((..((((((((..(((((&))))).)))).))))))).	2010	2029	1	-21.9	1	1.34728e-05	0.456	0.764269	2.14925	-8.6347	16	19	7	3UTR		0	0
mmu-miR-19b-2-5p	NM_026217	Atg12	.....((((((..(((((((((((&)))))))))))..)))...))).	1457	1480	1	-23.8	1	0.000396011	0.559	0.0859214	0.0892727	-18.3015	17	23	11	3UTR		0	0
mmu-miR-19b-2-5p	NM_026217	Atg12	.((((((.((((((((((((((..&)))))))))))))))))))).	724	745	1	-22.2	1	1.63327e-05	0.544	-0.0213228	-0.0883504	-6.10696	20	21	20	3UTR		0	0
mmu-miR-19b-3p	NM_026217	Atg12	((.(((((.(((((.(((((((.&)))))))))))).))))))).	961	982	1	-21.3	1	4.24942e-05	0.529	0.0859214	0.484065	-7.28695	19	21	12	3UTR		0	0
mmu-miR-30d-5p	NM_026217	Atg12	.......(((((((.(((((((&)))))))...))))))).	1404	1422	1	-18.7	0	7.52532e-05	0.574	0.131883	0.024256	-17.8457	14	18	7	3UTR		0	1
mmu-miR-30d-3p	NM_026217	Atg12	((((((((((..((....((((&))))....))...)))))))))).	730	754	1	-20.4	1	0.000146784	0.574	-0.0803073	-0.0407607	-11.0777	16	24	10	3UTR		0	0
mmu-let-7b-5p	NM_026217	Atg12	(((((((((((.(((.((((..&)))).))).)))..)))))))).	1975	1998	1	-21.6	1	1.10122e-05	0.412	0.145255	1.0251	-7.51743	18	23	8	3UTR		0	0
mmu-let-7b-5p	NM_026217	Atg12	((((((((((((.((((.((((&.)))))))))))))))))))).	1166	1198	1	-21.3	1	0.00140894	0.441	0.0859211	0.0999971	-5.22671	20	22	20	3UTR		0	0
mmu-let-7e-5p	NM_026217	Atg12	(((((((((.((((........&))))..))))))))).	1982	1998	1	-19.1	1	1.10122e-05	0.412	0.165718	0.99891	-6.14858	13	16	9	3UTR		0	0
mmu-miR-15a-3p	NM_026217	Atg12	...((((.((((.(((((((..&))))))))))))))).	934	950	1	-25.1	1	4.23773e-06	0.515	0.292749	0.442508	-10.1173	15	16	15	3UTR		0	0
mmu-miR-18a-3p	NM_026217	Atg12	((((.((..(((((((......&.)))))))..)).)))).	2187	2232	1	-20.5	1	2.69126e-06	0.5	2.59637	3.30555	-11.4266	13	18	7	3UTR		0	0
mmu-miR-26a-5p	NM_026217	Atg12	..(((((..((((((.(((((.&))))).))))))))))).	1706	1724	1	-23.2	1	0.00149815	0.5	0.33614	0.116047	-8.56007	16	18	11	3UTR		0	1
mmu-miR-26b-3p	NM_026217	Atg12	..(((((((.((((((((((..&.)))))))))).))))))).	959	996	1	-23.7	1	0.000895459	0.588	0.128819	0.446529	-6.19951	17	20	10	3UTR		0	0
mmu-miR-31-5p	NM_026217	Atg12	.(((.((((((..(((((((((&)))))))))......)))))).))).	2011	2037	1	-25.8	1	0.000185871	0.456	0.473307	1.97623	-12.5483	18	26	9	3UTR		0	0
mmu-miR-92a-2-5p	NM_026217	Atg12	..(((((((.(((((((((...&))))))))).)))).))).	662	681	1	-23	1	0.0315062	0.515	-0.128567	-0.0400904	-6.19951	16	19	9	3UTR		0	0
mmu-miR-34a-5p	NM_026217	Atg12	((((((.(((((((((((((((&)))))))))))).......................))).)))))).	936	982	1	-23.6	1	4.24942e-05	0.529	0.282065	0.486746	-5.48126	21	46	12	3UTR		0	0
mmu-miR-103-1-5p	NM_026217	Atg12	((((((((((.(((((.((((..&)).))))))).)))))))))).	2055	2077	1	-20.2	1	1.65101e-05	0.529	3.37628	3.05727	-6.76235	19	22	10	3UTR		0	0
mmu-miR-322-5p	NM_026217	Atg12	(((((((((((((((((((((.&.))))))))))))..)))))..)))).	1424	1467	1	-21.2	1	2.78248e-06	0.515	-0.0599308	0.201209	-3.93757	21	27	12	3UTR		0	0
mmu-miR-324-3p	NM_026217	Atg12	(((((.((.(((((((((((&)))))))))........)).)).))))).	1827	1856	1	-23.9	1	0.00569518	0.544	0.201596	0.0889247	-6.89492	18	29	9	3UTR		0	0
mmu-miR-326-5p	NM_026217	Atg12	.((((((((((((..((((..(((&))).))))..))))...)))))))).	1971	1997	1	-27	1	5.11923e-06	0.426	0.119164	0.954019	-5.38561	19	26	8	3UTR		0	0
mmu-miR-328-3p	NM_026217	Atg12	(((((.(((((((((.......&)))))))))..))))).	928	945	1	-22.9	1	0.000746521	0.5	0.473192	0.406983	-6.07158	14	17	9	3UTR		0	0
mmu-miR-331-5p	NM_026217	Atg12	.(((((((((.(((((((....&))))))).........))))))))).	1164	1190	1	-22.9	1	0.00373756	0.426	0.0501731	0.109381	-6.6181	16	26	9	3UTR		0	0
mmu-miR-340-3p	NM_026217	Atg12	..((((((((.((((((.....&.)))))))))))))).	1746	1767	1	-17.4	1	0.00187736	0.471	0.725821	-0.00366348	-7.78178	14	16	14	3UTR		0	0
mmu-miR-342-5p	NM_026217	Atg12	(((((((((.((((((......&.)))).)).))))))))).	1784	1840	1	-20.3	1	0.00189885	0.529	-0.341387	0.026264	-5.18008	15	19	9	3UTR		0	0
mmu-miR-342-5p	NM_026217	Atg12	.(.(((((..((((((((((..&))))))))))))))).).	2207	2225	1	-19.7	1	1.3804e-05	0.485	3.24851	3.28117	-7.64976	16	18	15	3UTR		0	0
mmu-miR-345-5p	NM_026217	Atg12	.((..((((((((((...((..&))...).)))))))))..)).	977	998	1	-18.8	1	0.00941837	0.574	0.977996	0.208582	-11.1774	14	21	9	3UTR		0	0
mmu-miR-345-3p	NM_026217	Atg12	((((((((((((((.(((((((&.)))))))...)))))))))))))).	1326	1371	1	-24.4	1	0.0401475	0.662	0.227637	0.0188938	-4.67302	21	26	14	3UTR		0	0
mmu-miR-346-5p	NM_026217	Atg12	.(((((((((((((.(((((...&))))))))))................))......)))))).	1827	1868	1	-23.3	1	0.0014083	0.529	0.195408	0.0833134	-4.52877	18	41	10	3UTR		0	0
mmu-miR-28a-3p	NM_026217	Atg12	...((.((((((((((((((((&)))))))..........))))))))).)).	1472	1502	1	-19.7	1	0.0113379	0.647	0.351969	0.0497263	-8.4155	18	30	9	3UTR		0	0
mmu-miR-28a-3p	NM_026217	Atg12	((((((..((..((((((....&))))))..)))))))).	1593	1610	1	-18.7	1	0.00108172	0.559	-0.369867	0.221699	-13.9665	14	17	8	3UTR		0	0
mmu-miR-139-5p	NM_026217	Atg12	((((((((((..(((((((...&)))))))....)))))))))).	504	526	1	-22.2	1	0.00149305	0.632	-0.112091	0.054294	-10.1092	17	22	10	3UTR		0	0
mmu-miR-139-5p	NM_026217	Atg12	......((((((((.(((((((&))))))))))))))).	1054	1070	1	-21.4	0	0.00107437	0.559	-0.0146199	0.0121911	-16.302	15	16	15	3UTR		0	0
mmu-miR-210-3p	NM_026217	Atg12	(((.(((((.((((((((....&)))))))).)).))).))).	1186	1206	1	-24	1	2.01113e-06	0.441	-0.0883507	0.0731861	-8.2121	16	20	8	3UTR		0	0
mmu-miR-212-3p	NM_026217	Atg12	..(((.((((((((((((((..&)))))).......)))))))).))).	1040	1066	1	-21.5	1	0.000138685	0.574	0.12933	0.214614	-6.85796	17	26	8	3UTR		0	0
mmu-miR-216a-3p	NM_026217	Atg12	((((.(((((((((.((.....&.)).))))))))).)))).	1701	1738	1	-22.7	1	0.000681741	0.515	0.074273	0.0758316	-8.79206	15	19	9	3UTR		0	0
mmu-miR-219a-1-3p	NM_026217	Atg12	.((((((.(((((...(((((.&)))))....))).)))))))).	1300	1322	1	-20.7	1	0.609887	0.397	0.425528	-0.0152902	-7.9323	16	22	8	3UTR		0	0
mmu-miR-320-3p	NM_026217	Atg12	....((((((.((((.((((..&))))..)))))))))).	1774	1791	1	-22.5	1	0.0540872	0.5	0.348608	0.0440335	-12.6044	14	17	10	3UTR		0	0
mmu-miR-320-3p	NM_026217	Atg12	....(((((((....(((((..&)))))))))))).	1285	1298	1	-20.6	1	0.0114607	0.5	-0.159208	-0.0722637	-15.7748	12	13	12	3UTR		0	0
mmu-miR-33-5p	NM_026217	Atg12	((((((...(((((((..((.&)).))))))))))))).	2006	2023	1	-19.4	1	3.1198e-06	0.441	-0.00767163	1.81163	-8.85129	15	17	13	3UTR		0	0
mmu-miR-211-5p	NM_026217	Atg12	...(((((((((((((..((((&))))...)))))))).))))).	732	754	1	-20.8	1	0.000146784	0.574	-0.0634546	-0.0380796	-6.51454	17	22	8	3UTR		0	0
mmu-miR-211-3p	NM_026217	Atg12	((.((((((((((((((.(((&))).)))).)))))))))))).	1937	1959	1	-24.1	1	0.0355017	0.618	0.179019	0.204894	-5.49511	19	22	12	3UTR		0	0
mmu-miR-29b-2-5p	NM_026217	Atg12	.(((.(((((((((((((((.....&.)))))...))))))))))))).	2046	2093	1	-25.7	1	0.000146693	0.456	4.10618	2.36567	-7.91236	18	23	13	3UTR		0	0
mmu-miR-199b-3p	NM_026217	Atg12	...((((((((((((.......&.)))))))))))).	1878	1894	1	-18	1	0.000123417	0.544	-0.193829	0.174967	-6.74759	12	14	12	3UTR		0	0
mmu-miR-181c-3p	NM_026217	Atg12	.((((.(.((.(((((((.((.&)).)))))))))))))).	1435	1453	1	-19.7	1	0.000604235	0.456	0.116562	0.130159	-10.8327	16	18	14	3UTR		0	0
mmu-miR-194-2-3p	NM_026217	Atg12	...(((((((((..(((((((.&.)))))))..........))))))))).	1761	1796	1	-23.8	1	0.11626	0.471	0.381861	0.100148	-8.66051	16	28	9	3UTR		0	0
mmu-miR-361-3p	NM_026217	Atg12	(((((((((.((((...........&)))).))))))))).	1907	1922	1	-23.1	1	1.55268e-05	0.574	0.448367	0.20957	-6.14858	13	15	9	3UTR		0	1
mmu-miR-362-5p	NM_026217	Atg12	....((((((((...((((((...&))))))...)))))))).	677	695	1	-19.6	1	0.000183356	0.529	0.0390023	-0.0836582	-12.428	14	18	8	3UTR		0	0
mmu-miR-365-1-5p	NM_026217	Atg12	.((((((.((((((((.((.(((&))))).))))).))).)))))).	1782	1805	1	-23.4	1	0.0465183	0.471	-0.175123	-0.00272839	-6.10696	19	23	6	3UTR		0	0
mmu-miR-377-5p	NM_026217	Atg12	...((((((((((.........&)))))))))).	932	943	1	-19.5	1	0.000220617	0.529	0.402291	0.422399	-8.33988	10	11	10	3UTR		0	0
mmu-miR-378a-3p	NM_026217	Atg12	....(((((((((.(((.((.&)).)))))))))))).	681	697	1	-18.1	1	0.000281856	0.515	-0.0213226	-0.0870096	-10.4034	14	16	12	3UTR		0	0
mmu-miR-381-5p	NM_026217	Atg12	.((.(((((((((((((......&.))))))))))))...).)).	896	950	1	-22.1	1	4.23773e-06	0.515	0.444519	0.271588	-6.82535	15	21	12	3UTR		0	0
mmu-miR-383-3p	NM_026217	Atg12	(((((((((((....(((.((&))...)))....))))))))))).	501	525	1	-22.9	1	0.00164094	0.632	-0.0768609	0.0580688	-10.1658	16	24	11	3UTR		0	0
mmu-miR-133b-3p	NM_026217	Atg12	...((((((((......(((..&))).....)))))))).	838	855	1	-19.1	1	0.00837886	0.706	0.635546	0.154959	-12.9758	11	17	8	3UTR		0	0
mmu-miR-215-3p	NM_026217	Atg12	..(.(((((((((((.(((..&))).))))))))))).).	1885	1903	1	-23.6	1	0.00126473	0.559	-0.172857	0.267555	-8.22207	15	18	11	3UTR		0	1
mmu-miR-215-3p	NM_026217	Atg12	((.(((((((((.(((((...&.)))))))))))))).)).	727	751	1	-22.5	1	4.1442e-05	0.588	-0.0213228	-0.0709232	-6.78424	16	19	14	3UTR		0	1
mmu-miR-431-3p	NM_026217	Atg12	(((((.((((((.((.(((...&))).))))))))))))).	1196	1214	1	-22.4	1	5.55108e-08	0.441	0.362969	0.0322991	-7.36071	16	18	13	3UTR		0	0
mmu-miR-433-3p	NM_026217	Atg12	..((((.((((((((((((.((&.)).)).)))))))).))..)))).	2033	2086	1	-22.6	1	5.20683e-05	0.485	3.84016	2.27772	-6.50069	18	25	8	3UTR		0	0
mmu-miR-449a-3p	NM_026217	Atg12	..((((((.((.(.((((((((&))))))))))))))))).	932	950	1	-22.2	1	4.23773e-06	0.515	0.293707	0.429102	-10.217	17	18	17	3UTR		0	0
mmu-miR-483-5p	NM_026217	Atg12	..(((((((((((((..((((.&))))..))))))..))))))).	1122	1144	1	-23.7	1	0.0363057	0.5	-0.0356216	-0.00322545	-5.19005	17	22	7	3UTR		0	0
mmu-miR-483-5p	NM_026217	Atg12	.(((((((((..(((..(((((&)))))....)))..))))))))).	1327	1351	1	-21.9	1	0.143655	0.559	0.282536	0.0322993	-10.198	17	24	9	3UTR		0	0
mmu-miR-486a-5p	NM_026217	Atg12	...(((((((.(((((((....&)))))))))))..))).	934	951	1	-21.5	1	4.7903e-06	0.5	0.292749	0.442508	-9.33931	14	17	11	3UTR		0	0
mmu-miR-546	NM_026217	Atg12	.((((((((((((((.&)))))))))))))).	1561	1576	1	-23.8	1	0.00111785	0.618	0.422974	-0.0388373	-4.02637	14	15	14	3UTR		0	0
mmu-miR-547-3p	NM_026217	Atg12	((..((((((((((.((((..&.)))).))))))))))..)).	1041	1072	1	-21.9	1	0.0012678	0.588	0.364756	0.193836	-9.26259	16	21	10	3UTR		0	0
mmu-miR-302b-3p	NM_026217	Atg12	..((((((.((((((........&.)))))).)))))).	1812	1837	1	-17.7	1	0.00222808	0.544	-0.175124	7.753e-05	-6.24644	12	15	6	3UTR		0	0
mmu-miR-302c-3p	NM_026217	Atg12	..((((...(((.((((((((.&)))))))).))).)))).	1052	1070	1	-18.1	1	0.00107437	0.559	0.280301	0.104689	-11.1598	15	18	8	3UTR		0	0
mmu-miR-302d-3p	NM_026217	Atg12	..(((((((((((((((((((((&))))))))).))))))......................)))))).	1437	1482	1	-22.1	1	0.000948576	0.574	0.0225499	0.10737	-4.957	21	45	9	3UTR		0	0
mmu-miR-302d-3p	NM_026217	Atg12	..((((((.((((((....((((&.)))))))))).)))))).	1796	1837	1	-20.1	1	0.00222808	0.544	0.29873	0.0515155	-6.24644	16	19	10	3UTR		0	0
mmu-miR-1224-5p	NM_026217	Atg12	(((.((.((((((((((((..&))))))).))))))).))).	1776	1796	1	-28.3	1	0.11626	0.471	0.231584	0.155327	-8.51328	17	20	7	3UTR		0	0
mmu-miR-1224-5p	NM_026217	Atg12	((((((....(((((((((..&)))))))))...)))))).	1323	1342	1	-27.8	1	0.299995	0.5	-0.0332392	0.000126245	-10.0938	15	19	9	3UTR		0	0
mmu-miR-1247-5p	NM_026217	Atg12	.(((((.((....((((((((.&))))))))........................)).))))).	1413	1454	1	-20.5	1	0.000188885	0.456	-0.235811	0.00280718	-14.0402	15	41	8	3UTR		0	0
mmu-miR-675-5p	NM_026217	Atg12	((.((.((.(((((((((((((&)))))))....)))))))).)).)).	2155	2181	1	-24.1	1	0.000485458	0.471	3.39685	3.51302	-8.45246	19	26	8	3UTR		0	0
mmu-miR-374b-3p	NM_026217	Atg12	(((((((((.((((((((((..&.)))))))))).........))))))))).	2195	2252	1	-21.5	1	0.00521366	0.559	2.87838	3.40305	-5.18008	19	30	10	3UTR		0	0
mmu-miR-216b-5p	NM_026217	Atg12	..(((((((((((.........&.))))))))))).	1705	1731	1	-17.6	1	0.00314388	0.515	0.0311956	0.0964068	-6.78234	11	13	11	3UTR		0	0
mmu-miR-592-3p	NM_026217	Atg12	.......((((((((((((...&.)))))))))))).	613	633	1	-19	0	0.00201918	0.676	0.184228	-0.0289938	-17.1102	12	14	12	3UTR		0	0
mmu-miR-1249-5p	NM_026217	Atg12	..(((((.(((((((((........&)))))))))...))))).	1322	1340	1	-25.6	1	0.332523	0.485	-0.0511132	-0.0099279	-7.27064	14	18	9	3UTR		0	0
mmu-miR-1249-5p	NM_026217	Atg12	..(((((((((.(((..((((((((&))))).))).))).))))))))).	2153	2177	1	-27.9	1	0.000283771	0.456	1.8833	3.5947	-8.53685	20	24	9	3UTR		0	0
mmu-miR-1843a-5p	NM_026217	Atg12	.((((((((((((.(((.((.&)).))))))))))).)))).	520	540	1	-18.3	1	0.0952554	0.588	0.0896379	0.0332598	-4.65016	17	20	11	3UTR		0	0
mmu-miR-770-3p	NM_026217	Atg12	.(((((.((((.((((.((((.&)))))))).....)))).))))).	1772	1796	1	-23.2	1	0.11626	0.471	-0.0354607	0.0178469	-8.68381	17	24	8	3UTR		0	0
mmu-miR-3475-3p	NM_026217	Atg12	.((((((((((((((..(((.&)))...)))))))))))))).	1344	1365	1	-19.6	1	0.0266052	0.618	0.465106	0.0705049	-4.02637	17	21	14	3UTR		0	0
mmu-miR-344d-3-5p	NM_026217	Atg12	(((((((((((..(((((.....&))))).))))))))))).	1606	1624	1	-19.8	1	5.10297e-05	0.574	-0.315691	-0.112472	-8.57351	16	18	11	3UTR		0	0
mmu-miR-672-5p	NM_026217	Atg12	((((((...((((((((((((((&.)))))))))))))))))))).	2210	2255	1	-24	1	0.00104567	0.544	2.92296	3.44265	-8.85129	20	22	20	3UTR		0	0
mmu-miR-670-3p	NM_026217	Atg12	.((((((((((((.(((((..((((&)))).))))))))))))......................))))).	1049	1094	1	-19.8	1	0.00252333	0.632	0.082767	0.00146674	-4.65016	21	45	12	3UTR		0	0
mmu-miR-764-3p	NM_026217	Atg12	.(((((.(((((.((((((((.&)))).))))...)))))))))).	1730	1753	1	-22.6	1	0.0697729	0.5	0.124153	0.0543208	-6.62614	18	23	10	3UTR		0	0
mmu-miR-764-3p	NM_026217	Atg12	.((((..(((((((.(((((..&))))).)))))))....)))).	762	784	1	-21.4	1	0.00876847	0.632	-0.0672844	0.0229152	-7.97342	16	22	7	3UTR		0	0
mmu-miR-3058-3p	NM_026217	Atg12	....(((((((((((((((((&)))))))))..)))))))).	751	771	1	-22.3	1	0.00732796	0.618	-0.0551896	-0.0414312	-9.54656	17	20	9	3UTR		0	0
mmu-miR-669a-5p	NM_026217	Atg12	.((((((((((((((.((((((((&.))))).)))..)))))))).)))))).	2216	2251	1	-23.3	1	0.00430814	0.574	3.60413	3.37098	-4.02637	22	28	8	3UTR		0	0
mmu-miR-344d-1-5p	NM_026217	Atg12	.(((((((((((((((...(.((.&))).))))))).........)))))))).	934	963	1	-23.5	1	0.00139415	0.456	0.376374	0.508865	-3.79332	18	29	8	3UTR		0	0
mmu-miR-666-5p	NM_026217	Atg12	((.(((((((((((((((((((&.)))))......)))))))))))).)).)).	1982	2027	1	-30.9	1	3.36346e-05	0.441	0.438775	1.48804	-5.49511	21	31	12	3UTR		0	0
mmu-miR-344d-2-5p	NM_026217	Atg12	((((((((((.(((....(((((.&)))))))))))))))))).	1231	1250	1	-22.3	1	0.00134199	0.559	0.0644723	-0.0132794	-7.73085	18	19	18	3UTR		0	0
mmu-miR-423-5p	NM_026217	Atg12	(((((.(((.(((((.(((....&))).)))))))).))))).	1146	1165	1	-24.2	1	0.00508878	0.485	0.0751968	-0.0233337	-7.31409	16	19	8	3UTR		0	0
mmu-miR-423-3p	NM_026217	Atg12	.((((((.(((((((.(((((((&.)))...)))).)))))))))....)))).	2052	2091	1	-27.6	1	0.000263177	0.441	4.73798	2.60154	-6.34001	20	30	9	3UTR		0	0
mmu-miR-681	NM_026217	Atg12	..(((((((((..((((((((&))).)))))..))))))))).	2176	2197	1	-28.2	1	4.48968e-07	0.441	2.63324	3.36517	-9.59293	17	21	9	3UTR		0	0
mmu-miR-690	NM_026217	Atg12	...(((((((((.(((((((..&))))..))).))))))))).	1604	1624	1	-22.4	1	5.10297e-05	0.574	-0.158496	-0.117834	-7.80367	16	20	9	3UTR		0	0
mmu-miR-692	NM_026217	Atg12	...((((((...((((((((.&))))))))....)))))).	2188	2207	1	-17.8	1	0.0209139	0.456	2.96184	3.33005	-13.9286	14	19	8	3UTR		0	0
mmu-miR-467b-5p	NM_026217	Atg12	((((((((((.((.((.....&)))).)))))))))).	745	761	1	-16	1	0.00619617	0.574	0.118094	-0.0126092	-7.61919	14	16	10	3UTR		0	0
mmu-miR-695	NM_026217	Atg12	..((((.((((((((.((((..&)))).)))))))).)))).	2227	2246	1	-21.4	1	0.00102948	0.559	3.41543	3.42451	-6.73374	16	19	8	3UTR		0	0
mmu-miR-455-3p	NM_026217	Atg12	(((((((((((.(((((....&)))))..)))))))).))).	2149	2169	1	-18.8	1	0.0184723	0.485	3.55453	3.53461	-7.28438	16	20	8	3UTR		0	0
mmu-miR-702-5p	NM_026217	Atg12	(((.(((((((((.((((((.&)))))))))).))))).))).	662	683	1	-24.7	1	0.00176516	0.515	0.0483861	-0.0447823	-7.82644	18	21	10	3UTR		0	0
mmu-miR-702-3p	NM_026217	Atg12	(((((.((..(((((..((...&.))..)))))..))))))).	971	996	1	-21.1	1	0.000895459	0.588	0.707936	0.356712	-8.37048	14	20	7	3UTR		0	0
mmu-miR-704	NM_026217	Atg12	..(((((.(((..((((((..&))))))...)))))))).	2069	2087	1	-19.3	1	0.000149278	0.485	3.30395	3.21328	-11.9066	14	18	8	3UTR		0	0
mmu-miR-709	NM_026217	Atg12	(((((((.(((((((....&.))))))).))))))).	1712	1753	1	-24.4	1	0.0697729	0.5	0.0778361	0.101083	-6.48426	14	17	7	3UTR		0	0
mmu-miR-501-5p	NM_026217	Atg12	....((.((((((((.((((..&)))).)))))))).)).	1082	1099	1	-22.2	1	0.00053132	0.632	0.17976	0.0115209	-11.3233	14	17	8	3UTR		0	0
mmu-miR-652-5p	NM_026217	Atg12	....(((((((.(((((((.....&))))))).))))))).	1156	1172	1	-24.6	1	4.1512e-05	0.456	0.00931829	0.0235857	-12.8934	14	16	7	3UTR		0	0
mmu-miR-676-3p	NM_026217	Atg12	(((.((((((((.(((.((((&)))))))..))))))))...))).	1982	2006	1	-24	1	7.56744e-05	0.368	0.407841	1.04006	-8.25873	18	24	8	3UTR		0	0
mmu-miR-676-3p	NM_026217	Atg12	...((((((((((((((((((&))))))........)))))))))))).	2231	2258	1	-22.8	1	0.00292476	0.544	3.77552	3.19813	-6.51454	18	27	12	3UTR		0	0
mmu-miR-804	NM_026217	Atg12	.((((((((.(((((((((((.&)))).)))))))...........)))))))).	1292	1324	1	-23.8	1	0.586428	0.412	-0.253685	0.0215749	-5.03583	19	32	8	3UTR		0	0
mmu-miR-804	NM_026217	Atg12	...(..(((((((((((((((.&))))))))...)))))))..).	978	1000	1	-22.4	1	0.00338208	0.588	0.818755	0.183782	-12.5345	16	22	8	3UTR		0	0
mmu-miR-742-5p	NM_026217	Atg12	..((((((((((((.......&)))))))))))).	2077	2090	1	-20	1	0.000297335	0.456	4.05215	3.56821	-5.9255	12	13	12	3UTR		0	0
mmu-miR-742-3p	NM_026217	Atg12	...((.((((((((((((((((&)))))))))))..))))).)).	2335	2357	1	-19.5	1	0.0127142	0.647	1.28591	1.49114	-8.4155	18	22	11	3UTR		0	0
mmu-miR-743b-3p	NM_026217	Atg12	....((((((((((((((((..&))))))))))))...)))).	543	563	1	-19.1	1	0.00738255	0.676	0.0225814	0.0649481	-9.54656	16	20	12	3UTR		0	0
mmu-miR-871-3p	NM_026217	Atg12	.(((((((.((.(((((((((((&))))))))).)).))...))))))).	921	947	1	-23.6	1	5.90018e-06	0.515	0.56852	0.287674	-8.19652	20	26	9	3UTR		0	0
mmu-miR-879-3p	NM_026217	Atg12	(((..(((((....((((((..&)))))))))))...))).	932	950	1	-18	1	4.23773e-06	0.515	0.00548817	0.419718	-19.4062	14	18	11	3UTR		0	0
mmu-miR-881-3p	NM_026217	Atg12	((((((((((((.((((.....&.))).).)))))))))))).	1078	1101	1	-16.8	1	0.000476991	0.632	0.0278309	0.0195642	-5.22671	16	20	12	3UTR		0	0
mmu-miR-882	NM_026217	Atg12	((((((.(((((((((......&))))))))....).)))))).	2121	2142	1	-17.7	1	0.000153372	0.471	3.79953	3.64214	-5.48126	15	21	8	3UTR		0	0
mmu-miR-193b-5p	NM_026217	Atg12	((((((((((((.(((((((..&.))))).)).)))))))).)))).	1161	1214	1	-27.3	1	5.55108e-08	0.441	-0.0130733	0.0872619	-5.22671	19	24	8	3UTR		0	0
mmu-miR-193b-3p	NM_026217	Atg12	...(((((((((.((((.....&.)))).))))))))).	1860	1893	1	-21.4	1	0.000266383	0.529	0.373549	0.117917	-7.80367	13	16	9	3UTR		0	0
mmu-miR-466f-5p	NM_026217	Atg12	...(((((((((.(((.(((((&.))))))))))))))))).	1557	1583	1	-22.6	1	0.00209279	0.588	0.395738	0.00271978	-7.80367	17	19	17	3UTR		0	0
mmu-miR-493-3p	NM_026217	Atg12	..(((((..((((((((((((..&))))....))))))))..))))).	2230	2254	1	-22.2	1	0.00162938	0.544	3.93253	3.34303	-8.32703	17	24	8	3UTR		0	0
mmu-miR-504-5p	NM_026217	Atg12	.(.((((((.((((.(((((((&))))))).))))))))..))).	928	950	1	-22.5	1	4.23773e-06	0.515	0.522558	0.397599	-7.32882	18	22	8	3UTR		0	0
mmu-miR-504-5p	NM_026217	Atg12	.(((((((((...((((((...&)))))).)))))).))).	1220	1238	1	-22.1	1	0.00250968	0.5	0.209252	-0.00121446	-11.254	15	18	6	3UTR		0	0
mmu-miR-574-5p	NM_026217	Atg12	....(((((((((((((.((.((&))))))))))))))))).	1568	1586	1	-21.2	1	0.0052092	0.588	-0.281183	0.116163	-9.54656	17	18	17	3UTR		0	0
mmu-miR-654-3p	NM_026217	Atg12	...(((((((..(((((((((.&))))))).)).)))).))).	980	1000	1	-20.1	1	0.00338208	0.588	0.922424	0.27695	-12.6861	16	20	7	3UTR		0	0
mmu-miR-449b	NM_026217	Atg12	((((....((((((((((((&))))))))))))....)))).	939	960	1	-21.8	1	0.00175329	0.485	0.233382	0.435805	-13.8149	16	21	12	3UTR		0	0
mmu-miR-598-5p	NM_026217	Atg12	((.(.(((((.(.((((((((((&))).)))))))).)))))).)).	2013	2036	1	-24.6	1	0.000154846	0.456	0.582134	2.14551	-13.7281	19	23	8	3UTR		0	0
mmu-miR-669k-5p	NM_026217	Atg12	.(((((((.((((((((((((..((&.))..)))))))))))))).))))).	1998	2031	1	-26	1	9.62188e-05	0.456	0.417193	1.7817	-4.84971	21	26	14	3UTR		0	0
mmu-miR-466i-5p	NM_026217	Atg12	((((((((((((.(((.((.&.))))))))))))))))).	1539	1586	1	-21.4	1	0.0052092	0.588	0.818756	-0.0400905	-5.22671	17	19	17	3UTR		0	0
mmu-miR-1187	NM_026217	Atg12	......((((((((((((.(((.&)))...)))))))))))).	1567	1586	1	-19.4	0	0.0052092	0.588	-0.311776	0.0980651	-15.5666	15	19	12	3UTR		0	0
mmu-miR-1188-5p	NM_026217	Atg12	((.((((.(((((((..(((.&)))..))))))).)))).)).	1779	1800	1	-22.5	1	0.0291621	0.485	0.345045	0.042163	-8.0418	16	21	7	3UTR		0	0
mmu-miR-466f	NM_026217	Atg12	..(((((((((.(((.(((((.&.))))))))))))))))).	1555	1583	1	-23.3	1	0.00209279	0.588	0.544688	-0.0165836	-8.53685	17	19	17	3UTR		0	0
mmu-miR-1190	NM_026217	Atg12	...(((((((((((..((((..&.))))))))))))))).	2054	2082	1	-23.6	1	3.53736e-05	0.5	4.18024	2.80642	-7.48304	15	17	15	3UTR		0	0
mmu-miR-466j	NM_026217	Atg12	...((((.(((.(((((((((..&)))))))))))))))).	1819	1836	1	-22	1	0.0016919	0.529	0.232225	0.10763	-12.175	16	17	16	3UTR		0	1
mmu-miR-466j	NM_026217	Atg12	(((((((((.(.(..((((((..&))))))..).).))))))))).	1049	1071	1	-19.8	1	0.00127821	0.574	0.0620895	0.00883968	-10.1192	17	22	9	3UTR		0	1
mmu-miR-1191a	NM_026217	Atg12	((((((((((.((((((((..&.)))))))).)))))))))).	1875	1906	1	-28.7	1	0.000728943	0.588	-0.274883	0.248851	-6.76235	18	21	10	3UTR		0	0
mmu-miR-1195	NM_026217	Atg12	.(((((.(((((((..(((((((&))))))).)).)))))))))).	1110	1132	1	-24.9	1	0.00021554	0.544	-0.0213228	0.024256	-6.30551	19	22	10	3UTR		0	0
mmu-miR-1198-3p	NM_026217	Atg12	.((((.((((((((.(((((((&))))..))))))))))).)).)).	977	1001	1	-20.2	1	0.00199855	0.603	0.796412	0.17976	-6.42973	19	24	11	3UTR		0	0
mmu-miR-1902	NM_026217	Atg12	(((((((((((.((((......&.))))..))))))))))).	1450	1474	1	-22.5	1	0.00169855	0.544	0.0859214	0.0892727	-7.28438	15	19	11	3UTR		0	0
mmu-miR-1902	NM_026217	Atg12	.(((((((((((((.(((((..&))))).))))....))))))))).	1140	1164	1	-22.3	1	0.00528898	0.485	-0.00239746	0.0249262	-4.52877	18	24	9	3UTR		0	0
mmu-miR-1892	NM_026217	Atg12	...(((((((((((((((((..&)))).))))))))))))).	1335	1354	1	-27	1	0.102586	0.574	0.205082	-0.0333876	-6.51454	17	19	13	3UTR		0	0
mmu-miR-1904	NM_026217	Atg12	(((((((((((((((((.(...&).))))))))))))..............................))))).	2061	2111	1	-25.7	1	0.000186053	0.456	3.6628	3.12711	-3.93757	18	50	12	3UTR		0	0
mmu-miR-1930-3p	NM_026217	Atg12	(((((((((..(((((((.(((&)))..)).)))))....))))))))).	1228	1255	1	-23.2	1	0.0264674	0.574	0.0442151	0.0028072	-8.00486	19	27	9	3UTR		0	0
mmu-miR-1931	NM_026217	Atg12	..(((((((.((((.(...(((&)))...).))))...))))))).	1411	1434	1	-21.9	1	0.0014032	0.5	-0.243472	0.119435	-6.93496	15	23	7	3UTR		0	0
mmu-miR-1931	NM_026217	Atg12	.((((((..((((.((...(((&)))..))))))..)))))).	1706	1726	1	-21	1	0.00128826	0.515	-0.299822	0.0702199	-8.02019	15	20	6	3UTR		0	0
mmu-miR-1932	NM_026217	Atg12	((((((((((((..((((((((&)))))))).)))))))........))))).	912	942	1	-24	1	4.29838e-05	0.544	0.413016	0.401621	-6.08354	20	30	8	3UTR		0	0
mmu-miR-1306-3p	NM_026217	Atg12	(((((((((((.((((((((.&)))))))).)))).))))))).	635	657	1	-22	1	0.0335487	0.588	-0.124098	-0.00590649	-7.28438	19	22	8	3UTR		0	0
mmu-miR-1947-5p	NM_026217	Atg12	((((((((..(((((((.(((.&.)))))))))).))).))))).	1112	1141	1	-21.2	1	0.0211327	0.515	-0.0749444	0.00146651	-6.23647	18	22	10	3UTR		0	0
mmu-miR-1949	NM_026217	Atg12	.....((((..(((((((((((((&)))))))))))))..)))).	1039	1059	1	-25.7	1	0.000340205	0.603	-0.0790695	0.234052	-17.7329	17	20	13	3UTR		0	0
mmu-miR-669l-5p	NM_026217	Atg12	.((((((((((((((.......&)))))))).)))))).	2235	2251	1	-17	1	0.00430814	0.574	3.68638	3.15713	-4.02637	14	16	8	3UTR		0	0
mmu-miR-669m-5p	NM_026217	Atg12	...((((.(((.(((((((((..&)))))))))))))))).	1819	1836	1	-22	1	0.0016919	0.529	0.232225	0.10763	-12.175	16	17	16	3UTR		0	1
mmu-miR-669m-5p	NM_026217	Atg12	(((((((((.(.(..((((((..&))))))..).).))))))))).	1049	1071	1	-19.8	1	0.00127821	0.574	0.0620895	0.00883968	-10.1192	17	22	9	3UTR		0	1
mmu-miR-669o-5p	NM_026217	Atg12	..((((((((((((((.......&)))))))).)))))).	2235	2251	1	-17	1	0.00430814	0.574	3.68638	3.15713	-4.957	14	16	8	3UTR		0	0
mmu-miR-1953	NM_026217	Atg12	.(((((.((((((((((((...&))))))))))))..))))).	1409	1429	1	-23.9	1	3.55863e-08	0.529	-0.0168541	0.024256	-5.33701	17	20	12	3UTR		0	0
mmu-miR-1954	NM_026217	Atg12	.(((((.((((((((((.(((&.))).)))))))))).))))).	1654	1703	1	-27.4	1	0.00138142	0.574	-0.162653	0.0711553	-5.33701	18	22	10	3UTR		0	0
mmu-miR-1956	NM_026217	Atg12	.((((((.((((((.((((((.&.)))))).)))))).))..)))).	1164	1209	1	-31.6	1	3.33767e-06	0.441	0.0501728	0.0477157	-6.84241	18	24	6	3UTR		0	0
mmu-miR-1962	NM_026217	Atg12	.((((((((.((..((((((((&))))))))))))).))))).	1732	1752	1	-21	1	0.0562023	0.485	0.445251	0.0505799	-7.1818	18	20	13	3UTR		0	0
mmu-miR-1946b	NM_026217	Atg12	(((((((((((((.(((((.(((...&.))))))))))))))))..))))).	1986	2036	1	-33.9	1	0.000154846	0.456	0.617957	1.43379	-4.79441	21	25	16	3UTR		0	0
mmu-miR-1981-5p	NM_026217	Atg12	(((((((((((((....((((((.&))))))......))))))))).....)))).	1694	1725	1	-23.2	1	0.00139592	0.5	-0.17928	0.0225231	-5.76291	19	31	9	3UTR		0	0
mmu-miR-432	NM_026217	Atg12	(((((((.((((((((((.((..&)).)))))))))).....))))..))).	907	935	1	-21.6	1	0.000473857	0.544	0.0591105	0.27896	-6.25121	19	28	10	3UTR		0	0
mmu-miR-2861	NM_026217	Atg12	(((((((((.(((((((((&.))).))))))))))))))).	1970	2004	1	-32	1	1.54922e-05	0.397	0.555608	0.283454	-5.18008	18	21	15	3UTR		0	0
mmu-miR-3057-5p	NM_026217	Atg12	...((((((((((((((((.....&.)))))...))))))))))).	1081	1133	1	-25.6	1	0.000440305	0.559	0.0464104	0.0175534	-6.51454	16	21	11	3UTR		0	0
mmu-miR-3060-5p	NM_026217	Atg12	((((((((((((((((((((&)))))))))....)).))))))))).	1814	1840	1	-28.5	1	0.00189885	0.529	0.18301	-0.00366336	-3.93757	20	26	9	3UTR		0	0
mmu-miR-3060-3p	NM_026217	Atg12	(((((((((.((((........&)))).))))))))).	510	525	1	-18.2	1	0.00164094	0.632	-0.149252	0.0617185	-6.14858	13	15	9	3UTR		0	0
mmu-miR-3062-3p	NM_026217	Atg12	.(.(((((((((.((((..&))))..))))))))).).	1725	1743	1	-18.8	1	0.000657131	0.485	0.331983	0.0477741	-6.63999	14	18	9	3UTR		0	0
mmu-miR-3064-5p	NM_026217	Atg12	...(((((((((((.(.((...&)))))))))))))).	1788	1803	1	-22.2	1	0.0371617	0.471	-0.193261	0.00662405	-7.24999	14	15	14	3UTR		0	0
mmu-miR-3067-3p	NM_026217	Atg12	((((..(((((((((.(((.((.&.)).))).)....))))))))..)))).	893	949	1	-27.5	1	4.20267e-06	0.515	0.498398	0.27628	-10.1906	18	28	8	3UTR		0	0
mmu-miR-3074-5p	NM_026217	Atg12	(((((((((((((((.((((..&)).)).)))))))...........)))))))).	1062	1095	1	-21.2	1	0.000756065	0.618	0.118919	0.00951012	-4.17062	19	33	8	3UTR		0	0
mmu-miR-3076-5p	NM_026217	Atg12	....((((((((((((((((.(((&)))...)))...)))))))).....))))).	1445	1476	1	-25.8	1	0.000811694	0.544	-0.153144	0.0235856	-9.54656	19	31	8	3UTR		0	0
mmu-miR-3078-5p	NM_026217	Atg12	((((((((((((((.(((.((..&)))))..)))))))))))))).	1354	1376	1	-20.2	1	0.0926083	0.706	0.219977	0.142895	-4.67302	19	22	14	3UTR		0	0
mmu-miR-3081-5p	NM_026217	Atg12	..(((((((((((.(((((.(((&))).))).)).))))))))))).	1983	2006	1	-31	1	7.56744e-05	0.368	0.439298	1.28696	-5.81384	19	23	11	3UTR		0	0
mmu-miR-3081-3p	NM_026217	Atg12	((((.((((((((((((.((...&.)))))).)))))))))))).	961	997	1	-23.3	1	0.00488489	0.574	0.0611729	0.419718	-8.05661	18	21	12	3UTR		0	0
mmu-miR-3082-3p	NM_026217	Atg12	..((((((.((((...((((((&)))))))))))))))).	2184	2201	1	-18.5	1	2.8175e-05	0.456	3.17352	3.2635	-7.83873	16	17	16	3UTR		0	0
mmu-miR-466m-5p	NM_026217	Atg12	...((((.(((.(((((((((..&)))))))))))))))).	1819	1836	1	-22	1	0.0016919	0.529	0.232225	0.10763	-12.175	16	17	16	3UTR		0	1
mmu-miR-466m-5p	NM_026217	Atg12	(((((((((.(.(..((((((..&))))))..).).))))))))).	1049	1071	1	-19.8	1	0.00127821	0.574	0.0620895	0.00883968	-10.1192	17	22	9	3UTR		0	1
mmu-miR-669p-5p	NM_026217	Atg12	.((((((((((((((.((((((((&.))))).)))..)))))))).)))))).	2216	2251	1	-23.3	1	0.00430814	0.574	3.60413	3.37098	-4.02637	22	28	8	3UTR		0	0
mmu-miR-3090-5p	NM_026217	Atg12	..((((((((((((((.((((&)))).))).))))))))))).	1276	1297	1	-28.2	1	0.00317111	0.5	-0.221511	-0.00791727	-4.957	18	21	11	3UTR		0	0
mmu-miR-3091-5p	NM_026217	Atg12	(((((.(((((((((((((.(&.).)).))).))))))...)).))))).	2052	2095	1	-25.8	1	3.20953e-05	0.441	3.86925	2.6057	-5.83853	19	28	6	3UTR		0	0
mmu-miR-3095-5p	NM_026217	Atg12	.((((..(((((((((..(((.&))).)))))))))....)))).	1109	1131	1	-21.5	1	0.000206729	0.559	-0.0213228	0.0202343	-7.23797	16	22	9	3UTR		0	0
mmu-miR-3095-3p	NM_026217	Atg12	.((.(.(((((((((((((....&)))))))))))))))).	1398	1415	1	-19.4	1	0.00820351	0.603	0.255037	0.036321	-8.72631	16	17	16	3UTR		0	0
mmu-miR-3098-5p	NM_026217	Atg12	..(((((.((.((((((((((.&.))))))))))..))...))))).	671	704	1	-19.3	1	0.0251478	0.529	0.0162131	-0.105777	-10.0954	17	24	10	3UTR		0	1
mmu-miR-3100-5p	NM_026217	Atg12	...((((((((((((...(((((&))))).)))).)))))))).	672	692	1	-25.8	1	0.000291625	0.515	0.057048	-0.115161	-6.74759	17	20	8	3UTR		0	0
mmu-miR-344g-3p	NM_026217	Atg12	..(((((.((((.(((((((((&)))))))))..)))).).)))).	1994	2017	1	-25.6	1	4.69788e-07	0.397	0.440054	1.1897	-8.55977	18	23	9	3UTR		0	0
mmu-miR-344f-5p	NM_026217	Atg12	..((((((.((((((.((((((&)))))))))))).)))))).	971	991	1	-24	1	1.2804e-06	0.559	0.0859213	0.463286	-6.24644	18	20	12	3UTR		0	0
mmu-miR-344f-5p	NM_026217	Atg12	..((((((((((..((((.((.&.)).))))..)))))))))).	680	716	1	-23.7	1	0.00338158	0.515	-0.0427714	-0.0937124	-7.10297	16	21	10	3UTR		0	0
mmu-miR-3102-3p	NM_026217	Atg12	(((((((((((((((........&))))))))).............)))))).	2303	2332	1	-19.7	1	0.0139343	0.618	1.67315	2.24311	-4.17062	15	29	9	3UTR		0	0
mmu-miR-3104-3p	NM_026217	Atg12	..((..((((((..(((((((((&)))))))))..))....))))....)).	1912	1940	1	-19.4	1	0.0302871	0.603	0.448367	0.20957	-13.123	17	28	9	3UTR		0	0
mmu-miR-486b-5p	NM_026217	Atg12	...(((((((.(((((((....&)))))))))))..))).	934	951	1	-21.5	1	4.7903e-06	0.5	0.292749	0.442508	-9.33931	14	17	11	3UTR		0	0
mmu-miR-486b-3p	NM_026217	Atg12	.((((((((((((((.((..&)).)))))))))))..))).	1453	1473	1	-22.8	1	0.000842207	0.544	-0.0246741	0.0202342	-4.02637	16	20	11	3UTR		0	0
mmu-miR-3113-3p	NM_026217	Atg12	((.((.(((((((((((((.&))))))..))))))).)).)).	977	999	1	-21.4	1	0.00581489	0.588	0.976046	0.260193	-7.39607	17	22	7	3UTR		0	0
mmu-miR-3470a	NM_026217	Atg12	(((((((((((.(((.((...&.)).))).))))))))))).	1862	1901	1	-23.9	1	0.000306513	0.559	0.704566	0.16842	-7.51743	16	20	11	3UTR		0	0
mmu-miR-3470a	NM_026217	Atg12	...((((((((.(((((((((&)))))))))...)))))))).	1708	1729	1	-23.6	1	0.00396004	0.515	0.290417	0.128205	-9.86134	17	21	9	3UTR		0	0
mmu-miR-3470b	NM_026217	Atg12	(((((((((((.(((.((...&.)).))).))))))))))).	1862	1901	1	-26.5	1	0.000306513	0.559	0.704566	0.16842	-7.51743	16	20	11	3UTR		0	0
mmu-miR-3470b	NM_026217	Atg12	...((((((((.(((((((((&)))))))))...)))))))).	1708	1729	1	-26.2	1	0.00396004	0.515	0.290417	0.128205	-9.86134	17	21	9	3UTR		0	0
mmu-miR-3473a	NM_026217	Atg12	((((((((((((((((((&))))))))..)))))))))).	1456	1477	1	-30.5	1	0.000150663	0.544	0.0108505	-0.0105985	-3.93757	18	21	10	3UTR		0	0
mmu-miR-3474	NM_026217	Atg12	((((.((((((((((.......&)))))..))))).)))).	1903	1921	1	-21.2	1	1.40195e-05	0.559	0.280025	0.169355	-8.28966	14	18	5	3UTR		0	0
mmu-miR-3961	NM_026217	Atg12	(((((((((.(((.((((.&)))).)))))))))))).	978	996	1	-24.5	1	0.000895459	0.588	0.657889	0.185122	-6.03692	16	18	12	3UTR		0	0
mmu-miR-378b	NM_026217	Atg12	...(((((((((.(((.((.&)).)))))))))))).	681	697	1	-17.9	1	0.000281856	0.515	-0.0213226	-0.0870096	-7.80367	14	16	12	3UTR		0	0
mmu-miR-3970	NM_026217	Atg12	(((((((((..((((((...&.))))))))))))))).	2214	2254	1	-19.3	1	0.00162938	0.544	2.07683	3.42723	-8.00486	15	17	15	3UTR		0	0
mmu-miR-3473b	NM_026217	Atg12	..((((((((((((((((((&.))))))..)))))))))))).	1449	1479	1	-32.3	1	0.000117285	0.544	-0.241173	0.0611211	-4.957	18	22	12	3UTR		0	0
mmu-miR-3473b	NM_026217	Atg12	(((((((((((..((((((.&))))))....))))))))))).	1118	1140	1	-27.1	1	0.0203596	0.529	-0.206562	0.00749898	-8.57351	17	22	11	3UTR		0	0
mmu-miR-5103	NM_026217	Atg12	..(((((((.(((((((((.&)))))))))))).......)))).	843	867	1	-21.5	1	0.00113373	0.676	0.586393	0.163673	-6.19951	16	24	12	3UTR		0	0
mmu-miR-5106	NM_026217	Atg12	.((..(((((((((((.(((...&)))..))))))))))).....)).	1452	1476	1	-23.2	1	0.000811694	0.544	0.0859214	0.0892727	-10.9444	16	24	11	3UTR		0	0
mmu-miR-5106	NM_026217	Atg12	..((((.(((.(((.((((((((&)))))))).)))))).)))).	974	995	1	-21.4	1	4.55389e-06	0.574	0.461275	0.368107	-10.0609	18	21	8	3UTR		0	0
mmu-miR-5107-5p	NM_026217	Atg12	(.((((..(((((((.(((((&))))).)))))))....)))).).	1739	1763	1	-24.6	1	0.0002286	0.471	0.505372	-0.115892	-9.19162	17	24	7	3UTR		0	0
mmu-miR-5112	NM_026217	Atg12	((((((((((...((((..&)))))))))))))).	1452	1467	1	-20.2	1	2.78248e-06	0.515	0.118095	0.0664833	-11.3983	14	15	14	3UTR		0	0
mmu-miR-5119	NM_026217	Atg12	....(((((((((((((..&))))))))))))).	733	747	1	-21.5	1	1.00754e-05	0.559	-0.0213228	-0.0561771	-9.54656	13	14	13	3UTR		0	0
mmu-miR-5120	NM_026217	Atg12	...(((((((((((((...((((&)))).))))))).......)))))).	2013	2039	1	-25	1	0.00132551	0.485	0.989557	2.18947	-6.51454	17	26	7	3UTR		0	0
mmu-miR-5123	NM_026217	Atg12	.(((((.((.((((((.((((((.&)))).)).)))))))).))))).	1437	1460	1	-21.2	1	4.26535e-05	0.485	0.108902	0.163003	-6.57952	19	23	8	3UTR		0	0
mmu-miR-5124a	NM_026217	Atg12	((((((((...(((((....&)))))...)))))))).	2269	2286	1	-18.9	1	0.0154715	0.632	3.49708	2.78574	-9.06125	13	17	8	3UTR		0	0
mmu-miR-5128	NM_026217	Atg12	....(((((((((.(((..((((&))))...))).).)))))))).	1773	1795	1	-25.8	1	0.110688	0.485	0.338633	0.0571268	-10.4034	16	22	8	3UTR		0	0
mmu-miR-5132-5p	NM_026217	Atg12	(.((((((((((((((((...&))))...))))))).))))).).	658	681	1	-23.6	1	0.0315062	0.515	-0.23581	-0.0461229	-5.10125	17	23	7	3UTR		0	0
mmu-miR-5135	NM_026217	Atg12	.(((.((.(((((..((((.((((&))))))))..))))).)).))).	2069	2092	1	-25.6	1	0.000216941	0.456	3.79527	3.64836	-11.8183	18	23	8	3UTR		0	0
mmu-miR-3544-3p	NM_026217	Atg12	..(((((((((((..((.....&))..))))))))))).	2190	2206	1	-20.7	1	0.015395	0.441	3.61336	3.31412	-6.54929	13	16	11	3UTR		0	0
mmu-miR-5615-5p	NM_026217	Atg12	.((((((((((((((.(((((.&.)))))...)))))))))))))).	916	945	1	-21.6	1	0.000746521	0.5	0.430635	0.42508	-4.02637	19	24	14	3UTR		0	0
mmu-miR-5621-5p	NM_026217	Atg12	.(.(((((((((((((.......&))))))))))))).).	1997	2013	1	-27.6	1	8.60416e-07	0.382	0.749562	1.4179	-5.35086	14	16	13	3UTR		0	0
mmu-miR-5622-3p	NM_026217	Atg12	...((((((((.((((((((((&)))))))))))))))))).	2018	2037	1	-26.1	1	0.000185871	0.456	0.203959	2.13896	-9.86134	18	19	18	3UTR		0	0
mmu-miR-5710	NM_026217	Atg12	(((((.(((.((.(((((((((&))))))))).))..)))...))))).	2180	2206	1	-21.5	1	0.015395	0.441	3.62509	3.26374	-8.37017	19	26	9	3UTR		0	0
mmu-miR-5710	NM_026217	Atg12	.(((((((((.(((((..((..&.))..)))))..))))))))).	663	695	1	-18.7	1	0.000183356	0.529	-0.0451544	-0.13728	-6.6181	16	22	9	3UTR		0	0
mmu-miR-6244	NM_026217	Atg12	(((((((((((.....((((.&))))))))))))))).	1737	1753	1	-20.1	1	0.0697729	0.5	0.357677	-0.0878349	-10.3988	15	16	15	3UTR		0	0
mmu-miR-6345	NM_026217	Atg12	..(((.((((((((((((...&.)))))))))))).))).	1134	1178	1	-23.1	1	0.000242709	0.471	-0.052602	-0.011939	-6.85796	15	18	12	3UTR		0	0
mmu-miR-6347	NM_026217	Atg12	(((((..(((((..((((((((&)))))))))))))...))))).	1465	1487	1	-24.3	1	0.0140428	0.603	-0.0347283	-0.0756152	-9.52819	18	22	13	3UTR		0	0
mmu-miR-6347	NM_026217	Atg12	((((((((((((.((..(((..&)))..)).)))).)))))))).	1234	1256	1	-22.1	1	0.0296912	0.574	-0.0213228	-0.00657666	-5.45975	17	22	8	3UTR		0	0
mmu-miR-6349	NM_026217	Atg12	.((.((((((((((((((((..&.))))))))))))..)))).)).	2142	2185	1	-28	1	4.21411e-06	0.485	4.15039	3.4158	-6.82535	18	23	12	3UTR		0	0
mmu-miR-6349	NM_026217	Atg12	(((((((((((((.(((((((.&)))))))....))))))))........))))).	660	693	1	-27	1	0.000112663	0.529	0.0527269	-0.0849988	-4.79441	20	33	8	3UTR		0	0
mmu-miR-6357	NM_026217	Atg12	((((((((((((.((((((....&.)))))).)))...........))))))))).	2089	2128	1	-23.4	1	0.000185899	0.485	3.52186	3.86951	-5.22671	18	32	9	3UTR		0	0
mmu-miR-6361	NM_026217	Atg12	.((.(((((((((.((((((.((&)).))..))))...))))))))).)).	982	1009	1	-22.5	1	0.00143839	0.559	0.74726	0.213274	-7.68219	19	27	9	3UTR		0	0
mmu-miR-6366	NM_026217	Atg12	((((((((((...(((((((((&))))))))).....)))))))))).	2031	2056	1	-26.7	1	0.0147876	0.5	3.82519	2.17195	-11.3983	19	25	10	3UTR		0	0
mmu-miR-6367	NM_026217	Atg12	....((((((((.(.(((((((&))))))).).)))))))).	1676	1695	1	-22.2	1	0.00221408	0.618	0.127269	-0.0522958	-11.5711	16	19	8	3UTR		0	0
mmu-miR-6369	NM_026217	Atg12	((((((((((((((((.((((..&))))..))))..)))..))))))))).	2260	2287	1	-21.3	1	0.0150436	0.618	3.70573	2.5868	-3.93757	20	27	9	3UTR		0	0
mmu-miR-6370	NM_026217	Atg12	(((((.(((((((.((((.((&)).)))).)))))))))))).	1938	1959	1	-21.7	1	0.0355017	0.618	0.141966	0.249786	-6.69537	18	21	12	3UTR		0	0
mmu-miR-6378	NM_026217	Atg12	(((((((((((((.((((....&.)))).))))................))))))))).	2052	2093	1	-22.2	1	0.000146693	0.456	3.80404	2.7425	-4.79441	17	36	9	3UTR		0	0
mmu-miR-6381	NM_026217	Atg12	..(((((((((.((.((((((&))).))).)).))))))))).	1462	1483	1	-20.8	1	0.0117812	0.574	0.604268	-0.0179715	-9.03925	17	21	9	3UTR		0	0
mmu-miR-6384	NM_026217	Atg12	(((((...((((.(((((((&)))))))))))...))))).	2200	2220	1	-18.6	1	0.0209433	0.471	2.66895	3.33859	-10.985	16	20	11	3UTR		0	0
mmu-miR-6384	NM_026217	Atg12	.(((((((((((........&))))))))))).	2305	2317	1	-16.9	1	0.145596	0.603	1.38392	2.27029	-6.90779	11	12	11	3UTR		0	0
mmu-miR-6386	NM_026217	Atg12	.(((((.(((((((((.((((((.&)))))).)))))))))))))).	1153	1175	1	-28.5	1	6.8796e-05	0.471	0.109753	0.0430237	-5.33701	20	22	14	3UTR		0	0
mmu-miR-6388	NM_026217	Atg12	.((((((.(((.(((((((((&))))))))).)))..)))))).	1687	1709	1	-26.1	1	0.000741568	0.559	0.50656	-0.0784823	-9.45376	18	22	9	3UTR		0	0
mmu-miR-5124b	NM_026217	Atg12	(((((((((...(((((....&.)))))...))))))))).	2248	2287	1	-18.4	1	0.0150436	0.618	3.39931	2.96218	-11.3517	14	19	9	3UTR		0	0
mmu-miR-6391	NM_026217	Atg12	((((((((((((..(((....&)))...))))))))).))).	1556	1576	1	-20.6	1	0.00111785	0.618	0.341657	-0.0274426	-6.08354	15	20	9	3UTR		0	0
mmu-miR-6395	NM_026217	Atg12	(((((.(((((((((.......&.)))))))))..))))).	902	945	1	-23.2	1	0.000746521	0.5	0.651931	0.278961	-6.07158	14	18	9	3UTR		0	0
mmu-miR-6396	NM_026217	Atg12	((((((.(((((.(.(((((((((&.))))))))).).)))))...............)))))).	1994	2039	1	-28.4	1	0.00132551	0.485	0.456681	1.18689	-7.50584	21	40	9	3UTR		0	0
mmu-miR-378d	NM_026217	Atg12	.(.((((((((((((.(.((((&))))).)))))))))))).).	1991	2012	1	-25.6	1	2.49646e-06	0.382	0.797523	1.42164	-5.58391	18	21	12	3UTR		0	0
mmu-miR-873b	NM_026217	Atg12	....(((((((((.(((((((.&)))))))................))))))))).	1062	1095	1	-20.9	1	0.000756065	0.618	0.0442155	0.0269372	-10.4034	16	33	9	3UTR		0	1
mmu-miR-6537-5p	NM_026217	Atg12	((((.(((((((((..(((((.&)))))..)))))))))..)))).	1907	1930	1	-25	1	0.000132928	0.574	0.373549	0.265684	-9.02511	18	23	9	3UTR		0	0
mmu-miR-6537-5p	NM_026217	Atg12	(((((((((((((((.(((...&.))))))))).))))))))).	484	537	1	-24.3	1	0.0183549	0.618	0.0713896	0.0627628	-4.17062	18	21	9	3UTR		0	0
mmu-miR-6538	NM_026217	Atg12	.((((((((((((((....&)))))))))))))).	1998	2013	1	-29.5	1	8.60416e-07	0.382	0.745862	1.57315	-4.02637	14	15	14	3UTR		0	0
mmu-miR-6540-5p	NM_026217	Atg12	((.((((((((((.(((.((((&.)))).)))))).))))))).)).	1969	1999	1	-24.4	1	2.5785e-05	0.397	0.242048	0.56496	-6.35195	19	24	7	3UTR		0	0
mmu-miR-3473e	NM_026217	Atg12	..(((((((((((((((((((&.))).))))..)))))))))))).	1436	1479	1	-29.7	1	0.000117285	0.544	-0.157815	0.0993268	-4.957	19	24	12	3UTR		0	0
mmu-miR-3473e	NM_026217	Atg12	(((((((((((..(((((((.&)))))))....))))))))))).	1117	1140	1	-27.7	1	0.0203596	0.529	-0.206562	0.00749898	-8.57351	18	23	11	3UTR		0	0
mmu-miR-6541	NM_026217	Atg12	(((((((((((..........&))))))))))).	1427	1439	1	-18.3	1	5.14008e-06	0.471	-0.152941	0.150268	-10.3988	11	12	11	3UTR		0	0
mmu-miR-6897-5p	NM_026217	Atg12	((((((((..(.(((((((((..&))))))))..).)..)))))))).	1730	1754	1	-26.5	1	0.0833138	0.485	0.140023	0.0365514	-9.58327	18	24	8	3UTR		0	0
mmu-miR-6897-3p	NM_026217	Atg12	....(((((((.(((((((((&))))))))).))).)))).	1913	1932	1	-21.3	1	0.0386657	0.588	0.307043	0.264749	-12.8934	16	19	9	3UTR		0	0
mmu-miR-6898-5p	NM_026217	Atg12	(((..((((((((((((..(((&)))...)))))))))))).))).	1457	1480	1	-25.8	1	0.000396011	0.559	-0.0928189	-0.0481339	-11.0886	18	23	12	3UTR		0	0
mmu-miR-6898-5p	NM_026217	Atg12	...(((((((((((((((((((&))))).....................))))))))..)))))).	1998	2041	1	-23.3	1	0.00322916	0.485	1.04336	2.03609	-6.51454	19	43	8	3UTR		0	0
mmu-miR-6899-3p	NM_026217	Atg12	(((.((..(((((((((((((..&))))))))))..)))..))))).	929	952	1	-22.1	1	2.20611e-05	0.515	0.303984	0.463286	-10.8269	18	23	10	3UTR		0	0
mmu-miR-6904-5p	NM_026217	Atg12	...(((((((.(((.(((((((&)))).))))))))))))).	1776	1795	1	-22.8	1	0.110688	0.485	0.155326	0.101083	-10.0748	17	19	13	3UTR		0	0
mmu-miR-6905-5p	NM_026217	Atg12	.(((((((((((((.((((.(((&))).)))).)))))))))).))).	1975	1999	1	-29.3	1	2.5785e-05	0.397	0.179376	1.0279	-4.52877	20	24	10	3UTR		0	0
mmu-miR-6909-5p	NM_026217	Atg12	....(((((((((.(((((...&)))))..))...))))))).	1774	1794	1	-24.1	1	0.10833	0.471	0.379783	0.117917	-10.4034	14	20	7	3UTR		0	0
mmu-miR-6909-5p	NM_026217	Atg12	.((((((((((((.(((((((.&)))).))).....)))))))))))).	2016	2042	1	-23.8	1	0.00407094	0.485	2.68047	2.21191	-4.65016	19	26	12	3UTR		0	0
mmu-miR-6910-5p	NM_026217	Atg12	(((((((.(((.....((((((.&))))))....))).))))).)).	1774	1797	1	-24.6	1	0.029768	0.485	-0.0784818	-0.0139512	-12.7125	16	23	6	3UTR		0	0
mmu-miR-6911-5p	NM_026217	Atg12	.((((((((((((..((.(((..&.))))).)))))))))))).	1744	1793	1	-30.1	1	0.0689473	0.485	0.230145	0.0430983	-5.38561	17	20	12	3UTR		0	0
mmu-miR-6911-3p	NM_026217	Atg12	.(((((.(((((((((((((.&.)))))...)))))))).))))).	1866	1906	1	-23.7	1	0.000728943	0.588	0.492012	0.140363	-5.33701	18	24	8	3UTR		0	0
mmu-miR-6916-3p	NM_026217	Atg12	((((((.((.((((((((....&)))))))).)))))))).	1216	1234	1	-21.7	1	0.016128	0.471	0.226679	-0.00925795	-6.72377	16	18	8	3UTR		0	0
mmu-miR-6916-3p	NM_026217	Atg12	..((((....((((((((((((&))))))))))))....)))).	518	539	1	-21.2	1	0.0570021	0.588	0.268805	0.0579818	-11.1132	16	21	12	3UTR		0	0
mmu-miR-6920-3p	NM_026217	Atg12	..(((((((((.((.......&)).))))))))).	928	941	1	-19	1	1.53021e-05	0.544	0.324241	0.384194	-9.2723	11	13	9	3UTR		0	0
mmu-miR-6921-5p	NM_026217	Atg12	...(((((.(((((((((.(((&.)))..))))))))).))))).	1956	2004	1	-28.8	1	1.54922e-05	0.397	0.589692	0.321799	-7.57093	17	22	9	3UTR		0	0
mmu-miR-6925-5p	NM_026217	Atg12	...((((((..(((((((((..&))))))))).....)).)))).	1406	1428	1	-20.2	1	5.2563e-07	0.544	0.252745	0.0235857	-10.5818	15	22	9	3UTR		0	0
mmu-miR-6925-5p	NM_026217	Atg12	((((((((....(((.((..(.&)..)).))))))))))).	2160	2178	1	-19.7	1	0.000413328	0.456	2.29052	3.5955	-12.6411	14	18	11	3UTR		0	0
mmu-miR-6926-5p	NM_026217	Atg12	...((((((((((.((.((((.&)))))).)))).)))))).	1777	1796	1	-25.5	1	0.11626	0.471	0.174031	0.0702201	-7.37138	16	19	6	3UTR		0	0
mmu-miR-6927-3p	NM_026217	Atg12	..(.(((((((((((((((..&)))).))).)))))))).).	929	949	1	-24.9	1	4.20267e-06	0.515	0.303564	0.444518	-7.98902	16	20	8	3UTR		0	0
mmu-miR-6929-3p	NM_026217	Atg12	.((((((((((.(((((.(((((&))).)).)))))))))))..)))).	1758	1783	1	-21.1	1	0.000112202	0.485	-0.536748	0.138493	-7.14013	20	25	11	3UTR		0	0
mmu-miR-6931-5p	NM_026217	Atg12	.((((((((((((((((.((.&)).)).))))))))...)))))).	662	686	1	-26.3	1	0.000587119	0.515	0.043024	-0.0581879	-3.79332	18	24	8	3UTR		0	0
mmu-miR-6932-3p	NM_026217	Atg12	(((((((((((((((((((((&.)).)))..))))))))))).....))))).	1819	1867	1	-22.8	1	0.00121811	0.529	0.254011	0.0243935	-3.93757	21	31	11	3UTR		0	0
mmu-miR-6936-5p	NM_026217	Atg12	((((((((((((((.......&))).))))))))))).	2223	2239	1	-21.5	1	8.86768e-05	0.529	2.66549	3.33288	-4.90607	14	16	11	3UTR		0	0
mmu-miR-6936-3p	NM_026217	Atg12	.((.(((((.((((.(((((.&))))))))).))).)).)).	1297	1317	1	-25.4	1	0.00459782	0.426	-0.032048	0.000796425	-8.8033	16	20	9	3UTR		0	0
mmu-miR-6936-3p	NM_026217	Atg12	.(((.(((((((((.......&))))))))).))).	1878	1892	1	-21.5	1	0.0180342	0.515	0.356923	0.157197	-8.88086	12	14	9	3UTR		0	0
mmu-miR-6937-5p	NM_026217	Atg12	..(((((..(((((((((......&))))))))).))))).	1783	1799	1	-23.8	1	0.0344067	0.485	0.290416	0.0702202	-8.32703	14	16	9	3UTR		0	0
mmu-miR-6939-5p	NM_026217	Atg12	(((((((((((((.(((((..&))))))))))).)))).))).	1235	1256	1	-24.1	1	0.0296912	0.574	0.0108503	-0.0360688	-4.79441	18	21	11	3UTR		0	0
mmu-miR-6939-3p	NM_026217	Atg12	(((..(.(((((((((((((&)))))))).))))).)..))).	2184	2206	1	-22.9	1	0.015395	0.441	3.35322	3.45038	-12.6323	17	22	8	3UTR		0	0
mmu-miR-6941-3p	NM_026217	Atg12	((((((.((((((((......&)))))))))))))).	934	949	1	-21.6	1	4.20267e-06	0.515	0.488087	0.42441	-5.71431	14	15	14	3UTR		0	0
mmu-miR-6942-3p	NM_026217	Atg12	...((((((.(((..(((((((&)))).)))..))).)))))).	1211	1232	1	-20.5	1	0.0317594	0.456	0.414357	-0.0119391	-9.34934	16	21	6	3UTR		0	0
mmu-miR-6956-5p	NM_026217	Atg12	((((((((((((.(((.(((&.))).))))))))).)))))).	1746	1789	1	-27.2	1	0.0467787	0.485	0.00137189	0.0262641	-5.22671	18	22	9	3UTR		0	0
mmu-miR-6957-3p	NM_026217	Atg12	((((.(((((((((.(((((((&))))))).)))).))))))))).	1217	1240	1	-24.5	1	0.00169873	0.515	0.102008	0.0135315	-8.79206	20	23	9	3UTR		0	0
mmu-miR-6957-3p	NM_026217	Atg12	.((.((((((((((((.(((((&))))).))))))))).))))).	1847	1869	1	-20.5	1	0.00350954	0.544	0.323669	0.111371	-6.82535	19	22	9	3UTR		0	0
mmu-miR-6960-5p	NM_026217	Atg12	((((((((.((.((..((((..&))))..)).)).)))))))).	1937	1958	1	-19.8	1	0.0314699	0.603	0.127269	0.280648	-9.30927	16	21	8	3UTR		0	0
mmu-miR-6961-5p	NM_026217	Atg12	((.(((((((((..(((.((&)).)))..)))))).))))).	2160	2181	1	-18.6	1	0.000485458	0.471	2.34858	3.46758	-7.64108	16	21	6	3UTR		0	0
mmu-miR-6962-5p	NM_026217	Atg12	...(((((((.(((((....&)))))...))))))).	681	697	1	-20.7	1	0.000281856	0.515	-0.174528	-0.0870096	-9.33931	12	16	7	3UTR		0	0
mmu-miR-6963-3p	NM_026217	Atg12	....(((((((((((((((....&.)).))).)))))))))).	975	999	1	-23.3	1	0.00581489	0.588	0.890251	0.238074	-9.54656	15	19	10	3UTR		0	0
mmu-miR-6964-5p	NM_026217	Atg12	.(((((((((((((((((((.&)))))))).))))))))))).	1144	1165	1	-23.6	1	0.00508878	0.485	0.0296181	0.0215749	-3.79332	19	21	11	3UTR		0	0
mmu-miR-6966-3p	NM_026217	Atg12	(((((((((..(((.(((((.&)))))))).))))))))).	1296	1315	1	-22.7	1	1.42397e-05	0.426	-0.206021	0.00481803	-8.7403	17	19	9	3UTR		0	0
mmu-miR-6969-5p	NM_026217	Atg12	((((((.((((((.((((....&))))..))).))))))))).	1173	1193	1	-19	1	0.0026709	0.426	-0.00600229	0.0926241	-6.3381	16	20	9	3UTR		0	0
mmu-miR-6970-5p	NM_026217	Atg12	((((((((.(((((((..(((((..&.)))))))))))).)))))))).	1689	1725	1	-29.9	1	0.00139592	0.5	-0.022369	0.033746	-4.99396	20	23	12	3UTR		0	0
mmu-miR-6972-3p	NM_026217	Atg12	.((((((((((((.(((((((&)))))))...))).))))))))).	2101	2125	1	-23.7	1	0.000175262	0.456	3.99178	3.79832	-4.65016	19	24	9	3UTR		0	1
mmu-miR-6979-3p	NM_026217	Atg12	...((((...(((((((((..&))).))))))..)))).	934	951	1	-20.2	1	4.7903e-06	0.5	0.182441	0.454572	-11.1271	13	17	6	3UTR		0	0
mmu-miR-6982-3p	NM_026217	Atg12	(((((((((((((........&.)))))))))..)))).	912	944	1	-23.3	1	0.000466634	0.515	0.157418	0.256841	-5.76291	13	17	9	3UTR		0	0
mmu-miR-6983-5p	NM_026217	Atg12	.((((.(((((((((((((...&.))))))))))))).)))).	1713	1746	1	-21.8	1	0.00533515	0.5	-0.182797	0.0477743	-5.69428	17	20	13	3UTR		0	0
mmu-miR-6983-5p	NM_026217	Atg12	..((((((((((.((((((((.&))))))..))..)))))))))).	2152	2175	1	-21.7	1	0.000265743	0.456	2.57356	3.56267	-6.24613	18	23	10	3UTR		0	0
mmu-miR-6985-5p	NM_026217	Atg12	..((.((((((.((((((((((&)))))))))))))))))).	1823	1842	1	-25.1	1	0.00105875	0.544	0.248851	0.155327	-12.4228	18	19	18	3UTR		0	0
mmu-miR-6986-3p	NM_026217	Atg12	(((((((.(((((((....&.)))))))))))))).	1826	1860	1	-18.9	1	0.0059719	0.529	-0.00767096	0.169355	-6.48426	14	16	14	3UTR		0	0
mmu-miR-6987-5p	NM_026217	Atg12	((((((((((((.(((((((((&)))))))))..))))..............)))))))).	1160	1198	1	-24.8	1	0.00140894	0.441	-0.0501963	0.0691645	-5.22671	21	38	9	3UTR		0	0
mmu-miR-6987-5p	NM_026217	Atg12	((((((((((((....((.(((&)))))...))).))))))))).	671	693	1	-23.3	1	0.000112663	0.529	0.10242	-0.105107	-7.05204	17	22	9	3UTR		0	0
mmu-miR-6988-5p	NM_026217	Atg12	(((.((((((((((((((.((&.)).)))))))))))))).))).	1089	1140	1	-31.8	1	0.0203596	0.529	-0.0213228	0.0490562	-6.9696	19	23	14	3UTR		0	0
mmu-miR-6989-5p	NM_026217	Atg12	((.((((..(((((.(((((..&))))).))))).)))).)).	1152	1172	1	-20.8	1	4.1512e-05	0.456	0.246787	0.00682876	-9.60059	16	20	5	3UTR		0	0
mmu-miR-6989-3p	NM_026217	Atg12	.(.((((((((((((((.((((&)))).))...)))))).))))).).).	1713	1740	1	-20.5	1	0.000211051	0.5	-0.113431	0.0384218	-5.35086	19	27	6	3UTR		0	0
mmu-miR-6990-3p	NM_026217	Atg12	.((((((((((((((((.(((&)))..))))))))).)...)))).)).	1210	1237	1	-22.4	1	0.00753225	0.485	0.142097	-0.0534961	-3.79332	19	27	9	3UTR		0	0
mmu-miR-6992-5p	NM_026217	Atg12	(((((.((((.(((((((.((((&)))).))))))).)))).))))).	972	996	1	-23.5	1	0.000895459	0.588	1.04346	0.30108	-8.66331	20	24	7	3UTR		0	0
mmu-miR-6992-3p	NM_026217	Atg12	(((((((((((.((((......&)))).))...))))))))).	2294	2314	1	-15	1	0.105767	0.618	2.30682	2.44318	-7.28438	15	20	9	3UTR		0	0
mmu-miR-6998-5p	NM_026217	Atg12	(((((((((..(((.(((((..&))))).)))...))))))))).	1691	1713	1	-23.9	1	0.00115465	0.544	0.065959	0.0346812	-8.7403	17	22	9	3UTR		0	0
mmu-miR-7000-3p	NM_026217	Atg12	......(((((.((((((((((&)))))))).....................)).))))).	1054	1092	1	-20.8	0	0.0517592	0.632	0.108408	0.0390022	-18.9134	15	38	8	3UTR		0	0
mmu-miR-7007-5p	NM_026217	Atg12	(((((((.(((((..((((((..&))))))....))))).))))))).	1128	1152	1	-21.5	1	0.02821	0.485	-0.0979257	-0.0105985	-7.8435	18	24	7	3UTR		0	0
mmu-miR-7015-5p	NM_026217	Atg12	...(((((((.((.(((((((((&))))))))).))..))))))).	1232	1254	1	-22.4	1	0.0289444	0.574	0.211039	-0.0240038	-10.1962	18	22	9	3UTR		0	0
mmu-miR-7016-5p	NM_026217	Atg12	...((((((((((.(((((((&)))).))).)))))))))).	2024	2044	1	-22.5	1	0.00580948	0.5	4.28907	2.18292	-7.37138	17	20	10	3UTR		0	0
mmu-miR-7016-3p	NM_026217	Atg12	.(((((((..(((.((((((((&)))))))...............).)))....))))).)).	1413	1453	1	-21.6	1	0.000604235	0.456	-0.137893	0.115414	-6.94906	18	40	7	3UTR		0	0
mmu-miR-7017-5p	NM_026217	Atg12	.((((((((.((((...(((((((&.))))).))..........)))).)))))))).	1282	1340	1	-26.2	1	0.332523	0.485	-0.316244	0.00749914	-6.00433	19	33	8	3UTR		0	0
mmu-miR-7019-3p	NM_026217	Atg12	...(((((((.(((.((((((..&))))))))).)))))..)).	929	949	1	-23.9	1	4.20267e-06	0.515	0.0918795	0.422399	-10.0748	16	20	9	3UTR		0	0
mmu-miR-7024-3p	NM_026217	Atg12	.((((((((..(((((((.....&.))))))).)))))))).	970	1005	1	-25.3	1	0.000728407	0.559	1.02431	0.318507	-7.86061	15	18	8	3UTR		0	0
mmu-miR-7025-3p	NM_026217	Atg12	..(((((.((((((........&))))))..))))).	1054	1068	1	-17.7	1	0.000102953	0.559	0.130606	0.0845808	-8.23913	11	14	6	3UTR		0	0
mmu-miR-7026-3p	NM_026217	Atg12	(((((.(((((((..(((.....&.))))))))))))))).	1784	1825	1	-19.1	1	0.145096	0.485	0.0350826	0.00942975	-7.43082	15	17	15	3UTR		0	0
mmu-miR-7028-5p	NM_026217	Atg12	.((.(((((((..(((((((...&.)))))))))))))).)).	1978	2002	1	-28	1	9.59442e-05	0.397	0.280915	0.449926	-11.4613	16	19	14	3UTR		0	0
mmu-miR-7031-5p	NM_026217	Atg12	((((.((.((((((..((((((.&)))))))))))))))))).	1988	2007	1	-26.2	1	2.29346e-05	0.368	0.323669	0.904451	-11.3387	18	19	18	3UTR		0	0
mmu-miR-7032-5p	NM_026217	Atg12	..(((((((((((((.(((.(((((.&.)))))))).)))).................))))))))).	1888	1947	1	-30	1	0.0208046	0.588	0.116671	0.318993	-5.19005	21	41	9	3UTR		0	0
mmu-miR-7033-5p	NM_026217	Atg12	.((((.(((((((((..((((((&.))))))))))))))))))).	1953	2008	1	-31.7	1	1.81583e-06	0.368	0.50656	0.351726	-5.92733	19	21	19	3UTR		0	0
mmu-miR-7033-3p	NM_026217	Atg12	((((((((.((.(((.(((((&.)))))))).)).)))))))).	947	996	1	-25.4	1	0.000895459	0.588	0.152949	0.462616	-8.57382	18	22	8	3UTR		0	0
mmu-miR-7035-5p	NM_026217	Atg12	.((((((((((((((((((..&))))))))).)))).))))).	1458	1479	1	-30.4	1	0.000117285	0.544	0.0778782	0.0195639	-3.79332	18	21	9	3UTR		0	0
mmu-miR-7035-3p	NM_026217	Atg12	..((((((((((((((((((.&)))))))).....................)))))))))).	2198	2238	1	-28.2	1	5.14678e-05	0.515	2.8795	3.49327	-4.957	18	40	10	3UTR		0	0
mmu-miR-7037-5p	NM_026217	Atg12	((.(((((((((((((........&)))))))....)))))).)).	681	702	1	-21.2	1	0.0273624	0.529	-0.0465566	-0.0984043	-5.49511	15	21	7	3UTR		0	0
mmu-miR-7037-3p	NM_026217	Atg12	.((((((((((((.(((((...&))))).)))))....))))))).	690	713	1	-21.1	1	0.000811029	0.5	-0.0246744	-0.0809773	-4.65016	17	23	7	3UTR		0	1
mmu-miR-7041-5p	NM_026217	Atg12	.(((((.(((.((.((((((...&.)))))))).)))))))).	1441	1475	1	-21.1	1	0.00183653	0.559	-0.048134	0.122116	-9.01863	16	19	8	3UTR		0	0
mmu-miR-7041-3p	NM_026217	Atg12	((((((..((((((((((((&)))))..))))))).)))))).	1210	1232	1	-22.5	1	0.0317594	0.456	0.223807	-0.0206527	-7.7949	18	22	7	3UTR		0	0
mmu-miR-7044-5p	NM_026217	Atg12	((((((.((((((((((..&)))))))))).)))))).	663	681	1	-26	1	0.0315062	0.515	0.123457	-0.048804	-5.48126	16	18	10	3UTR		0	0
mmu-miR-7044-5p	NM_026217	Atg12	(((((...(((((((((..&)))))))))...))))).	1567	1585	1	-23.7	1	0.00366612	0.588	-0.158357	0.0255665	-9.69585	14	18	9	3UTR		0	0
mmu-miR-7046-5p	NM_026217	Atg12	(.((((((((((((((((((((((&))))))))))).))))))))))).).	1146	1172	1	-33.8	1	4.1512e-05	0.456	0.0113165	0.0524076	-5.10125	23	26	11	3UTR		0	0
mmu-miR-7048-5p	NM_026217	Atg12	.((((((((((((((.((....&.))))))))..)))))))).	1746	1794	1	-30.2	1	0.10833	0.471	0.328345	0.0253288	-4.02637	16	20	8	3UTR		0	1
mmu-miR-7048-5p	NM_026217	Atg12	.(((((.(((((((((((....&)))))))))))))))).	1335	1352	1	-26.3	1	0.129496	0.559	-0.00669836	-0.00322518	-5.33701	16	17	16	3UTR		0	1
mmu-miR-7050-5p	NM_026217	Atg12	((((((..(((((.(((((..&))))).)))))...)))))).	1122	1143	1	-21.3	1	0.0272297	0.5	-0.0570705	0.0162126	-8.65174	16	21	6	3UTR		0	0
mmu-miR-7051-3p	NM_026217	Atg12	((((((((((..(((...((((&.))))...))))))))))))).	2177	2238	1	-25.1	1	5.14678e-05	0.515	3.35011	3.34002	-10.3422	17	22	13	3UTR		0	0
mmu-miR-7056-5p	NM_026217	Atg12	.(((((.((.(((((((.(((.&))).))))))).)).))).)).	1937	1959	1	-20.4	1	0.0355017	0.618	0.665698	0.180578	-6.57952	17	22	7	3UTR		0	0
mmu-miR-7060-5p	NM_026217	Atg12	.((((((((((((((...(((.&))).))).))))))))))).	1185	1205	1	-23.2	1	2.40024e-06	0.441	-0.0141735	0.0886023	-4.02637	17	20	11	3UTR		0	1
mmu-miR-7063-5p	NM_026217	Atg12	..((((((((((.(((.((((..&.)))).))))))))))))).	1436	1475	1	-28.5	1	0.00183653	0.559	-0.450299	0.0986565	-6.24613	17	20	13	3UTR		0	0
mmu-miR-7063-3p	NM_026217	Atg12	(((((((((((.........&))))))))))).	928	940	1	-19.5	1	2.56856e-07	0.544	0.456401	0.435134	-10.3988	11	12	11	3UTR		0	0
mmu-miR-7064-5p	NM_026217	Atg12	...(((((....((((((...(((&)))))))))))))).	1982	1997	1	-17.9	1	5.11923e-06	0.426	0.311199	0.74359	-14.985	14	15	14	3UTR		0	0
mmu-miR-7064-3p	NM_026217	Atg12	((.(((((...((((((((..&))))))))...)).))).)).	503	524	1	-20.2	1	0.00181976	0.632	0.219036	0.0378785	-10.6188	15	21	8	3UTR		0	0
mmu-miR-7067-5p	NM_026217	Atg12	....(((((((((.((((((...&)))))).))))))))).	660	677	1	-25.2	1	0.00130475	0.544	0.157418	-0.0655609	-10.4034	15	17	9	3UTR		0	0
mmu-miR-6769b-5p	NM_026217	Atg12	.(((((((((((((..(((.&)))..))))))..............))).)))).	1784	1818	1	-22.1	1	0.270064	0.485	-0.0851628	0.0337459	-4.76182	16	34	6	3UTR		0	0
mmu-miR-7068-5p	NM_026217	Atg12	(((.((((.(((..(((((((&)))))))))).)))).))).	1776	1796	1	-24	1	0.11626	0.471	0.174031	0.112306	-10.172	17	20	10	3UTR		0	0
mmu-miR-7069-5p	NM_026217	Atg12	((.((((((((((.((((.(...&).)))).)).)))))))).)).	1985	2007	1	-26	1	2.29346e-05	0.368	0.473307	1.20934	-6.35195	17	22	8	3UTR		0	0
mmu-miR-7070-5p	NM_026217	Atg12	((((((.(.(((((((.(((.&))).))))))).).)))))).	2168	2189	1	-28	1	4.32547e-06	0.485	2.17129	3.53261	-6.53765	17	21	7	3UTR		0	0
mmu-miR-7077-3p	NM_026217	Atg12	.(((((((((((((((((..&.)))).).)))))))))))).	2052	2099	1	-30.7	1	0.000828265	0.441	4.11581	2.62476	-3.79332	17	21	12	3UTR		0	0
mmu-miR-7079-5p	NM_026217	Atg12	.((.((((((((((.((.((((&)))))).)).)))))))).)).	1980	2002	1	-28.4	1	9.59442e-05	0.397	0.228445	1.01107	-7.5608	18	22	8	3UTR		0	0
mmu-miR-7082-3p	NM_026217	Atg12	((((((...((((((.((((..&.))))..)))))).......................)))))).	934	995	1	-23.7	1	4.55389e-06	0.574	0.0859215	0.436475	-9.08433	16	43	6	3UTR		0	0
mmu-miR-7083-5p	NM_026217	Atg12	(((((((.((((((((((((.&))))))..)))))).))))).)).	1941	1965	1	-21.7	1	0.000883723	0.544	0.264883	0.219858	-6.25121	19	24	6	3UTR		0	0
mmu-miR-7083-5p	NM_026217	Atg12	((.(((((((....(((((..&)))))))))))).)).	1703	1719	1	-20.7	1	0.000893976	0.5	0.280916	0.134751	-13.8127	14	16	12	3UTR		0	0
mmu-miR-7087-5p	NM_026217	Atg12	.((((((((((((((..((((&))))...))..)))))))))))).	1168	1192	1	-23.8	1	0.00311634	0.426	0.0457045	0.0999971	-4.02637	18	24	12	3UTR		0	0
mmu-miR-7091-3p	NM_026217	Atg12	...(((((((((((((((...&.)))))))))))).))).	2410	2440	1	-22.9	1	0.000170766	0.706	-0.537247	0.345262	-6.51454	15	18	12	3UTR		0	0
mmu-miR-7094-1-5p	NM_026217	Atg12	.((((((((........(((((.&))))).........)))))))).	1114	1137	1	-17.4	1	0.00822823	0.559	-0.108458	0.0215748	-14.3219	13	23	8	3UTR		0	0
mmu-miR-7115-3p	NM_026217	Atg12	....((((...((((((((...&)))))))).)))).	987	1001	1	-20.7	1	0.00199855	0.603	0.494789	0.173727	-14.6702	12	14	8	3UTR		0	0
mmu-miR-7211-3p	NM_026217	Atg12	.((((((..(((.(((((((((.&)))).)))))))))))))).	666	686	1	-22.2	1	0.000587119	0.515	0.0054888	-0.0662312	-8.45248	18	20	14	3UTR		0	0
mmu-miR-7211-3p	NM_026217	Atg12	.(((((((..((.((((.((((.&)))))))).))..))))))).	1324	1345	1	-21.1	1	0.255242	0.529	0.0476199	0.0108506	-7.38135	17	21	8	3UTR		0	0
mmu-miR-7214-3p	NM_026217	Atg12	..(((((.((.(((((....(((.&)))...))))))).))))).	982	1002	1	-21.5	1	0.000718095	0.588	0.879527	0.213274	-10.0954	15	20	7	3UTR		0	1
mmu-miR-7216-5p	NM_026217	Atg12	...((.(((((((((((((((((.&))))))))...........)))))).))))).	1684	1716	1	-27.9	1	0.00054672	0.529	0.140491	0.0599325	-8.4155	19	32	8	3UTR		0	0
mmu-miR-7216-5p	NM_026217	Atg12	((((((((((((((((..((((..&))))))))))).)))......)))))).	1449	1477	1	-24.1	1	0.000150663	0.544	0.0322993	-0.00590652	-3.93757	20	28	11	3UTR		0	0
mmu-miR-7219-5p	NM_026217	Atg12	.((((.((((((.((((((((((&)))))))))).................)))))).)))).	1122	1161	1	-20.7	1	0.00656486	0.485	-0.037409	0.0135315	-6.98341	20	39	10	3UTR		0	0
mmu-miR-7228-3p	NM_026217	Atg12	.((.((((((((((...&))).))))))).)).	740	755	1	-17.7	1	0.00562002	0.559	-0.118818	-0.0568474	-7.79385	12	15	7	3UTR		0	0
mmu-miR-7230-3p	NM_026217	Atg12	((((((((((((....(((((((&)))))))))))))..)))))).	1184	1206	1	-21.9	1	2.01113e-06	0.441	0.0897511	0.0644724	-7.05204	19	22	13	3UTR		0	0
mmu-miR-7230-3p	NM_026217	Atg12	..((((((((((((((.((....&.)).))).))))))))))).	1081	1132	1	-21.1	1	0.00021554	0.544	0.0180002	0.0235859	-4.957	16	20	11	3UTR		0	0
mmu-miR-7232-3p	NM_026217	Atg12	(((((((...(..(((((((((&)))))))))..)..))))))).	2062	2084	1	-21.5	1	3.41168e-05	0.485	3.34136	2.95085	-13.186	17	22	9	3UTR		0	0
mmu-miR-7237-5p	NM_026217	Atg12	..(((.((..(((((((((((((.&.)))))))))))))...........))))).	1113	1162	1	-24.7	1	0.00618462	0.485	0.0281745	-0.00925784	-9.15686	18	31	13	3UTR		0	0
mmu-miR-7241-5p	NM_026217	Atg12	((((((((((((((....((((.&))))....))))))))))).))).	2222	2246	1	-20.8	1	0.00102948	0.559	3.93313	3.37898	-4.90607	18	24	11	3UTR		0	0
mmu-miR-7646-5p	NM_026217	Atg12	((..((.(((((((((((((..&)))))))))..)))).))..)).	909	932	1	-22.1	1	0.00163748	0.544	0.21104	0.256171	-10.0708	17	23	9	3UTR		0	0
mmu-miR-7648-5p	NM_026217	Atg12	..((((((((((((.((((.&)))).))))))))))..)).	1705	1725	1	-26	1	0.00139592	0.5	-0.0237041	0.0524506	-5.69245	16	20	10	3UTR		0	0
mmu-miR-7649-3p	NM_026217	Atg12	((((((((((((((..(((((((&)))))))...)))))))).)))).)).	503	530	1	-25	1	0.00118042	0.647	0.101251	0.0531301	-4.90607	21	27	8	3UTR		0	0
mmu-miR-7036b-3p	NM_026217	Atg12	((((((((..((((((((((((&)))).))))))........))..)))))))).	1204	1236	1	-26.8	1	0.018804	0.471	0.297856	-0.0534961	-6.23647	20	32	8	3UTR		0	0
mmu-miR-7653-5p	NM_026217	Atg12	...((((((((((((((.((((&.)).)).)))))))))..))))).	1712	1752	1	-24.3	1	0.0562023	0.485	-0.12992	0.0309399	-6.51454	18	24	9	3UTR		0	0
mmu-miR-7654-5p	NM_026217	Atg12	..((((..(((((((.((((((&))...)))).)))))))..)))).	977	1001	1	-22.3	1	0.00199855	0.603	0.629801	0.168365	-9.04737	17	24	7	3UTR		0	0
mmu-miR-7655-5p	NM_026217	Atg12	.(((((.(((((((........&.)))))))))))).	1981	2010	1	-23.5	1	3.91319e-06	0.368	0.035082	0.635103	-6.30551	12	14	12	3UTR		0	0
mmu-miR-7657-3p	NM_026217	Atg12	...((((((...(((((((((((&)))))))...)))))))))).	977	998	1	-21.1	1	0.00941837	0.574	0.901741	0.263544	-13.9286	17	21	10	3UTR		0	0
mmu-miR-7659-5p	NM_026217	Atg12	(((((((((((((.((..((((&)))).)).)))))).......................))))))).	1995	2040	1	-24.6	1	0.00232636	0.471	0.965865	2.10249	-4.79441	19	45	7	3UTR		0	0
mmu-miR-7659-3p	NM_026217	Atg12	(((((((((..(((.(((.(((.&))).)))...))).))))))))).	2016	2040	1	-21	1	0.00232636	0.471	2.47679	2.16608	-8.7403	18	24	9	3UTR		0	0
mmu-miR-7662-5p	NM_026217	Atg12	....((((((((((((((((..&)))))).)))))))))).	724	742	1	-25.7	1	6.35188e-06	0.544	-0.0213228	-0.0595285	-9.54656	16	18	10	3UTR		0	0
mmu-miR-7663-5p	NM_026217	Atg12	(((((.((((..(((..(((((.&))))))))..)))).))))).	1293	1314	1	-22.4	1	7.29095e-06	0.441	0.10737	-0.0615392	-12.2432	17	21	8	3UTR		0	0
mmu-miR-7663-3p	NM_026217	Atg12	.(((((((((((((...((((.&.)))).))))))))))))).	1149	1187	1	-23	1	0.0103524	0.426	0.0281742	0.0490562	-4.76182	17	20	13	3UTR		0	0
mmu-miR-7665-3p	NM_026217	Atg12	.(((((.(..((((((.((((.&)))).))))))..).))))).	929	950	1	-24.1	1	4.23773e-06	0.515	0.371905	0.431113	-7.63591	16	21	6	3UTR		0	0
mmu-miR-7666-5p	NM_026217	Atg12	((((((((.(((((.(((....&)))))))).)))))))).	1876	1894	1	-24.7	1	0.000123417	0.544	-0.592863	0.232951	-5.72941	16	18	8	3UTR		0	0
mmu-miR-7667-5p	NM_026217	Atg12	(((((((((.(((..(((((((&)))).)))..)))....))))).)))).	2304	2332	1	-20.6	1	0.0139343	0.618	1.50153	1.93958	-6.77237	19	28	5	3UTR		0	0
mmu-miR-7667-3p	NM_026217	Atg12	.(((((((.((((.(((.(((.&))).))).)))).))))))).	1120	1141	1	-20.5	1	0.0211327	0.515	-0.0596239	0.00146652	-5.70655	17	21	7	3UTR		0	0
mmu-miR-7668-3p	NM_026217	Atg12	.(((((((((((((..((((((&)))))))))))..............)))))))).	1128	1162	1	-21.4	1	0.00618462	0.485	-0.00742064	0.0289478	-4.76182	19	34	11	3UTR		0	0
mmu-miR-7670-5p	NM_026217	Atg12	.(((((.((((((((((.....&))))))))))..))))).	1701	1719	1	-20.3	1	0.000893976	0.5	0.121657	0.0253289	-5.33701	15	18	10	3UTR		0	0
mmu-miR-7672-3p	NM_026217	Atg12	.(((((.((((((((((((((&))))))))))).)))....))))).	2080	2105	1	-23.6	1	3.0213e-05	0.456	4.21127	3.74365	-5.33701	19	25	11	3UTR		0	0
mmu-miR-7674-5p	NM_026217	Atg12	((((((..(((((((.(((((((.&))).)))).)))).))))))))).	1974	1998	1	-28.1	1	1.10122e-05	0.412	0.501364	0.319928	-8.02794	20	24	9	3UTR		0	0
mmu-miR-7674-5p	NM_026217	Atg12	((((((((((((((.(((((((((&)))))..))))..)))...))))))))))).	1134	1165	1	-24.4	1	0.00508878	0.485	0.0291449	0.0302885	-4.67302	23	31	11	3UTR		0	0
mmu-miR-129b-5p	NM_026217	Atg12	.((((((((((((((..(((..&.)))..)))))))))))))).	1231	1278	1	-23.9	1	0.0723175	0.529	0.112732	-0.0213227	-4.02637	17	21	14	3UTR		0	1
mmu-miR-292b-5p	NM_026217	Atg12	.(((((.((((((((((......&.)))..)))))))..))))).	942	992	1	-21.5	1	9.96933e-07	0.559	0.170822	0.465297	-5.33701	15	21	7	3UTR		0	1
mmu-miR-292b-3p	NM_026217	Atg12	....((((((((((((.(((.&)))))...)))))))))).	976	995	1	-20.4	1	4.55389e-06	0.574	0.840204	0.20523	-9.54656	15	19	10	3UTR		0	0
mmu-miR-7677-3p	NM_026217	Atg12	(((((((((((((((.(((..((&.)))))))))))))..))))))).	916	949	1	-24.5	1	4.20267e-06	0.515	0.417117	0.404302	-4.17062	20	24	13	3UTR		0	0
mmu-miR-7677-3p	NM_026217	Atg12	.(((((.(((((((((((((.((&))))))))..))))))))).))).	978	1002	1	-22.6	1	0.000718095	0.588	0.765133	0.20389	-5.33701	20	24	9	3UTR		0	0
mmu-miR-6715-3p	NM_026217	Atg12	((((((((((((.((......&))..))))))))..)))).	2333	2352	1	-18.8	1	0.000339412	0.676	1.06589	1.51183	-5.45975	14	19	8	3UTR		0	0
mmu-miR-3620-5p	NM_026217	Atg12	(((.(((((((((.((..(((.&)))..)).))))..)))))))).	1983	2006	1	-25.3	1	7.56744e-05	0.368	0.398488	1.15884	-7.82644	17	23	8	3UTR		0	0
mmu-miR-3620-5p	NM_026217	Atg12	((((((((((((.((((.....&)))))))))))).)))).	1780	1798	1	-24	1	0.0310853	0.5	0.00712775	0.058062	-5.22671	16	18	12	3UTR		0	0
mmu-miR-7682-5p	NM_026217	Atg12	...(((.((((((((..(((((..&))))).))))))))))).	2137	2155	1	-20.5	1	0.000266036	0.456	4.30118	3.40401	-8.29128	16	18	11	3UTR		0	0
mmu-miR-7686-5p	NM_026217	Atg12	.((((((.(((..(...((((((((&))).)))))....)..))))))))).	2073	2099	1	-26.9	1	0.000828265	0.441	3.95654	3.40409	-11.7114	18	26	9	3UTR		0	0
mmu-miR-1258-3p	NM_026217	Atg12	...(((((((((.((((((((.&))))))))..))))))))).	997	1017	1	-18.8	1	0.00701151	0.544	0.592351	0.205901	-7.80367	17	20	9	3UTR		0	0
mmu-miR-7243-5p	NM_026217	Atg12	(.(((((((.((((((((((&)))))))))).)))).))).).	1199	1221	1	-23.4	1	8.66729e-05	0.456	0.241425	0.044364	-6.34376	18	22	10	3UTR		0	0
mmu-miR-3473f	NM_026217	Atg12	...((((((((((((((.((&)).)))))))))))))).	1125	1143	1	-23	1	0.0272297	0.5	-0.0864348	0.00883952	-6.51454	16	18	14	3UTR		0	0
mmu-miR-8090	NM_026217	Atg12	..(((((..(((((((....&.)))))))..))))).	1722	1761	1	-20.2	1	0.000265463	0.471	0.0137052	0.0412275	-8.32703	12	16	7	3UTR		0	0
mmu-miR-8091	NM_026217	Atg12	(((((((((.((((((.(((((&))))).))))))............))))))))).	1312	1346	1	-23.8	1	0.235137	0.515	0.103796	-0.00456578	-5.18008	20	34	9	3UTR		0	0
mmu-miR-8096	NM_026217	Atg12	(((((((.((((((((((((&))))))))))))...))))))).	2044	2067	1	-26.5	1	2.14012e-05	0.515	3.83392	2.14644	-6.25121	19	23	12	3UTR		0	0
mmu-miR-8098	NM_026217	Atg12	(((((((((((((((((((..&))).))))))).)))...................)))))).	934	975	1	-25.2	1	0.000929262	0.485	0.268236	0.480713	-3.93757	19	41	7	3UTR		0	0
mmu-miR-8101	NM_026217	Atg12	((((((((((((((((((((((&))))))..........................)))))))))........................)))).......))).	1997	2077	1	-29.8	1	1.65101e-05	0.529	2.34378	2.00419	-3.93757	22	80	9	3UTR		0	0
mmu-miR-8105	NM_026217	Atg12	((((((((((.((((((((...&.)))))))).))).)).....))))).	1671	1711	1	-22.9	1	0.000920967	0.559	0.253526	-0.0401377	-6.76235	18	27	8	3UTR		0	0
mmu-miR-8107	NM_026217	Atg12	.(((....((.(((((((((.&)))))))))))....))).	1121	1140	1	-19.9	1	0.0203596	0.529	-0.0868605	0.0162126	-16.4954	14	19	11	3UTR		0	0
mmu-miR-8111	NM_026217	Atg12	.((((((..((((((.((((.&)))).).)))))..)))))).	1697	1718	1	-23.1	1	0.000791205	0.515	0.0350811	0.0215879	-7.3964	16	21	6	3UTR		0	0
mmu-miR-8111	NM_026217	Atg12	((((((((.(.(((..((((.&))))..))).)..)))))))).	2324	2346	1	-20.4	1	2.71863e-05	0.618	0.95863	1.51529	-8.78724	16	22	8	3UTR		0	0
mmu-miR-8119	NM_026217	Atg12	(((((((((((((((((((.&.)).))))))))))))))..))).	2020	2049	1	-22.9	1	0.00100797	0.485	2.09892	2.1876	-3.93757	19	24	14	3UTR		0	0
mmu-miR-3473g	NM_026217	Atg12	....((((((((((((((((&)))))))))).)))))).	1468	1486	1	-22.8	1	0.0213699	0.588	0.451813	-0.0233337	-9.54656	16	18	10	3UTR		0	0
mmu-miR-3473g	NM_026217	Atg12	.....(((.((((((((((.&))).))))))).))).	1780	1796	1	-21	1	0.11626	0.471	0.350876	0.0861192	-14.722	13	16	7	3UTR		0	0
mmu-miR-3473g	NM_026217	Atg12	...((((.((((((((.(((&))).))))))))...)))).	1703	1723	1	-20.7	1	0.00208934	0.485	0.108565	0.120723	-8.82818	15	20	8	3UTR		0	0
mmu-miR-3154	NM_026217	Atg12	..((((((((((((((.((((.&)))).)))))))))))))).	2024	2044	1	-26	1	0.00580948	0.5	3.12938	2.20162	-4.957	18	20	14	3UTR		0	0
mmu-miR-1911-3p	NM_026217	Atg12	...(((((((..((((((((((&))))))))))..))))))).	1722	1742	1	-25.8	1	0.000316443	0.485	-0.200063	0.0290695	-12.6861	17	20	10	3UTR		0	1
mmu-miR-5104b-5p	NM_026217	Atg12	(((((.(((((((((.(((((.&.))).))))))))))).))))).	1713	1780	1	-23.9	1	7.34037e-05	0.5	-0.125244	0.00475332	-6.07158	19	23	11	3UTR		0	0
mmu-miR-12178-5p	NM_026217	Atg12	..((((((((((((((((((((((&)).)))))))))))).....)))))))).	1954	1983	1	-21.9	1	7.31511e-05	0.441	0.473307	0.335827	-4.957	22	29	12	3UTR		0	0
mmu-miR-12178-3p	NM_026217	Atg12	((((((.(((((...((((((.&.))))))....))))))))))).	1192	1222	1	-23	1	0.000192599	0.441	0.211039	0.0818996	-8.36268	17	23	11	3UTR		0	0
mmu-miR-12181-5p	NM_026217	Atg12	(((((((((((((((.((((..&))))..))))))))).......)))))).	2227	2256	1	-20.9	1	0.00142148	0.529	3.97294	3.15647	-4.17062	19	29	9	3UTR		0	0
mmu-miR-12181-3p	NM_026217	Atg12	(((((((((............&))))))))).	1409	1419	1	-16.9	1	0.000174531	0.574	0.0263415	0.0296181	-14.4661	9	10	9	3UTR		0	0
mmu-miR-12184-5p	NM_026217	Atg12	.((((.((((((.(((.(((..&))).))).)))))))))).	1782	1801	1	-22.1	1	0.0307661	0.471	-0.175123	-0.00553404	-6.98341	16	19	10	3UTR		0	0
mmu-miR-12185-5p	NM_026217	Atg12	.(((((((((.(((.((((((.((.&)).))))))..))).))))))))).	1730	1755	1	-27.7	1	0.0973772	0.5	0.48162	-0.0859644	-7.35355	20	25	9	3UTR		0	0
mmu-miR-12187-5p	NM_026217	Atg12	.....(((((((((((((.(((&))).))))))))))))).	1458	1476	1	-22.6	1	0.000811694	0.544	-0.0790697	-0.0219931	-13.6656	16	18	13	3UTR		0	0
mmu-miR-12195-5p	NM_026217	Atg12	(((((.(((((((((((.((..&.)).))))))))))).))))).	961	1011	1	-25.6	1	0.00430056	0.559	0.0274247	0.436475	-5.83853	18	22	11	3UTR		0	0
mmu-miR-3473h-5p	NM_026217	Atg12	.((((((((((..((((...&))))...)))))))))).	2022	2040	1	-19.2	1	0.00232636	0.471	2.16421	2.18479	-8.42926	14	18	10	3UTR		0	0
mmu-miR-12197-3p	NM_026217	Atg12	(((((((((((((((((.&))))).)))))))))))).	2322	2341	1	-22.2	1	1.22772e-05	0.618	1.56314	1.94386	-3.93757	17	19	12	3UTR		0	0
mmu-miR-12199-3p	NM_026217	Atg12	..((((((((((((((.(...&).))))))).))))))).	928	946	1	-21.2	1	0.000227919	0.5	0.332583	0.412345	-4.957	15	18	7	3UTR		0	0
mmu-miR-12201-5p	NM_026217	Atg12	.(((((((.(((...(((((.&)))))...)))))))))).	2024	2043	1	-20.7	1	0.00458599	0.485	4.40665	2.22875	-7.73113	15	19	10	3UTR		0	0
mmu-miR-12201-3p	NM_026217	Atg12	(((((((...(((((.(((((&))))).)))))...))))))).	2087	2109	1	-25	1	2.69623e-05	0.441	2.77819	4.03775	-8.78315	17	22	7	3UTR		0	0
mmu-miR-30a-3p	NM_026693	Gabarapl2	..(((((((.(((((((((((.&.))))))))...))).))))))).	880	914	1	-21.8	1	0.00442326	0.647	2.06798	2.08406	-6.19951	18	24	8	3UTR		0	0
mmu-miR-125a-3p	NM_026693	Gabarapl2	..(((..((((((((.(((((.&))))).))))))))..))).	690	710	1	-24.8	1	1.96411e-05	0.574	0.760436	1.88875	-8.6347	16	20	8	3UTR		0	0
mmu-miR-127-5p	NM_026693	Gabarapl2	.(((..((((((((((......&))))))))))..))).	704	720	1	-20.8	1	0.00188522	0.588	1.51333	1.76429	-9.81332	13	16	10	3UTR		0	0
mmu-miR-150-5p	NM_026693	Gabarapl2	(((((...(((((.(((((.(.&).))))))))))....))))).	760	782	1	-19.3	1	0.309334	0.529	1.35826	1.53679	-10.5527	16	22	10	3UTR		0	0
mmu-miR-155-3p	NM_026693	Gabarapl2	(.(((((((.((..(((((..&)))))..)).))))))).).	740	760	1	-17.4	1	0.0956204	0.559	2.6361	1.46436	-8.48973	15	20	7	3UTR		0	0
mmu-miR-183-5p	NM_026693	Gabarapl2	....((((((((((........&)))))))))).	562	573	1	-16.9	1	0.0124249	0.618	1.17871	2.22541	-10.5151	10	11	10	3UTR		0	0
mmu-miR-24-3p	NM_026693	Gabarapl2	(((((((((((((((.((....&.)).))))))))))))))).	869	917	1	-25.2	1	0.00663749	0.647	2.09771	2.12036	-4.17062	17	20	15	3UTR		0	0
mmu-miR-202-3p	NM_026693	Gabarapl2	.((((.((((.(((((((((((&))))))))))).)))))))).	660	681	1	-22.5	1	0.0153252	0.574	1.8242	1.81938	-8.51906	19	21	11	3UTR		0	0
mmu-miR-204-5p	NM_026693	Gabarapl2	(((((((((((((((..(((((&)))))...).)))))))))))))).	750	775	1	-22.2	1	0.604593	0.515	1.57148	1.64901	-4.17062	20	25	14	3UTR		1	0
mmu-miR-207	NM_026693	Gabarapl2	(((((((((..(((((((((((.&.)))))))...............))))...))))))))).	730	785	1	-28.8	1	0.0681731	0.529	1.75315	1.3807	-8.00486	20	40	9	3UTR		0	0
mmu-miR-290a-5p	NM_026693	Gabarapl2	.......(((((((((((....&))))))))))).	673	685	1	-16.3	0	0.00325294	0.559	1.95033	1.79082	-17.1102	11	12	11	3UTR		0	0
mmu-miR-292a-5p	NM_026693	Gabarapl2	........((((((((((....&)))))))))).	545	556	1	-18	0	0.00582372	0.529	0.72167	2.31723	-19.4239	10	11	10	3UTR		0	0
mmu-miR-296-3p	NM_026693	Gabarapl2	..(((((.((((((((((((..&.))))))))))).).))))).	523	565	1	-29.1	1	0.156974	0.574	1.36077	1.62759	-7.27064	17	21	11	3UTR		0	0
mmu-miR-298-5p	NM_026693	Gabarapl2	(((((.(((((((.((.((((((&)))..))).)))))))))))))).	480	504	1	-26	1	0.00593937	0.456	0.549113	2.76917	-6.69537	20	24	14	3UTR		0	0
mmu-miR-19b-2-5p	NM_026693	Gabarapl2	(((((.((((((((((((((..((&.)).))))))))))).))).))))).	863	911	1	-21.7	1	0.0033659	0.632	2.47549	1.99654	-5.83853	21	26	11	3UTR		0	0
mmu-let-7e-3p	NM_026693	Gabarapl2	((((((.(((((((........&.)))))))..)))))).	711	763	1	-18.5	1	0.134211	0.544	1.06212	1.63983	-6.44976	13	17	7	3UTR		0	0
mmu-miR-93-3p	NM_026693	Gabarapl2	((((((..(((...(((((((.&))))))).)))..)))))).	747	767	1	-19.8	1	0.224237	0.544	1.91324	1.37968	-13.2877	16	20	7	3UTR		0	0
mmu-miR-34a-5p	NM_026693	Gabarapl2	((((((.(((((((((((((((&))))))))))).....))..)).)))))).	517	547	1	-20.7	1	0.00136516	0.544	1.72775	1.6888	-5.48126	21	30	11	3UTR		0	0
mmu-miR-103-3p	NM_026693	Gabarapl2	..((((((....((((((((((.&))))))))))....)))))).	789	810	1	-20.6	1	0.00729722	0.618	1.51333	1.71022	-13.4275	16	21	10	3UTR		0	0
mmu-miR-323-3p	NM_026693	Gabarapl2	..((((((((.....((((((&))))))..)))))))).	748	765	1	-17.8	1	0.168552	0.529	1.73981	1.48476	-14.01	14	17	8	3UTR		0	0
mmu-miR-328-5p	NM_026693	Gabarapl2	((((((((((((((((.((...&)).))))))))))))....)))).	488	512	1	-28.1	1	0.0851341	0.485	1.38274	2.50698	-3.93757	18	24	12	3UTR		0	0
mmu-miR-329-3p	NM_026693	Gabarapl2	.((.((((((.((.((((((((&)))))))))).)).)))))).	746	767	1	-18.3	1	0.224237	0.544	2.32131	1.3501	-10.507	18	21	10	3UTR		0	0
mmu-miR-331-5p	NM_026693	Gabarapl2	.(((((((((((((((((((..&.)))).)))))).))))))))).	682	726	1	-23.6	1	0.0143941	0.588	1.19037	1.79286	-3.79332	19	23	9	3UTR		0	0
mmu-miR-337-3p	NM_026693	Gabarapl2	(((((((((.............&))))))))).	778	788	1	-15.2	1	0.0509608	0.544	0.834115	1.86223	-14.4661	9	10	9	3UTR		0	0
mmu-miR-346-3p	NM_026693	Gabarapl2	.(((((((((((((...(((((&))))).))))))..))))))).	524	546	1	-26	1	0.00101315	0.544	1.22768	2.02137	-4.76182	18	22	7	3UTR		0	0
mmu-miR-139-3p	NM_026693	Gabarapl2	.(((((((((((((.((.((..&))..)).)))))...................)))))))).	473	513	1	-21.3	1	0.0851932	0.5	1.36489	2.99666	-4.52877	17	40	8	3UTR		0	0
mmu-miR-214-5p	NM_026693	Gabarapl2	.((((.((((((((((((....&)))))))))................))).)))).	751	785	1	-19.7	1	0.0681731	0.529	1.74126	1.55107	-5.69428	16	34	9	3UTR		0	0
mmu-miR-214-3p	NM_026693	Gabarapl2	(((((((((((((.((((.((.&.)).)))).))))))))..............))))).	477	530	1	-20.8	1	0.000870888	0.5	1.43262	2.75488	-4.79441	19	37	8	3UTR		0	0
mmu-miR-320-5p	NM_026693	Gabarapl2	.((((((.(((((....((.((&)).))....))))).)))))).	760	782	1	-19.6	1	0.309334	0.529	0.770638	1.76531	-7.9323	15	22	6	3UTR		0	0
mmu-miR-128-2-5p	NM_026693	Gabarapl2	((((((.(.(((((...((((((&))))))...)))))).)))))).	658	681	1	-21.5	1	0.0153252	0.574	1.61399	1.86835	-7.50615	18	23	6	3UTR		0	0
mmu-miR-365-3p	NM_026693	Gabarapl2	....((((((.....(((((..&))))).....)))))).	768	785	1	-18	1	0.0681731	0.529	0.865854	1.78163	-18.5996	11	17	6	3UTR		0	0
mmu-miR-375-5p	NM_026693	Gabarapl2	(((...((((((((........&))))))))..))).	777	791	1	-20.7	1	0.00151491	0.559	0.903261	1.8153	-13.9581	11	14	8	3UTR		0	0
mmu-miR-196b-3p	NM_026693	Gabarapl2	.....(.(((.(((((((((((&)))))))).))).))).).	748	767	1	-19.8	0	0.224237	0.544	2.34851	1.41335	-18.0341	15	19	8	3UTR		0	0
mmu-miR-409-5p	NM_026693	Gabarapl2	(((((.(((((((((........&))))))..)))))))).	688	705	1	-17.9	1	3.99164e-06	0.559	0.919028	1.77143	-6.07158	14	17	8	3UTR		0	0
mmu-miR-434-3p	NM_026693	Gabarapl2	.....((((((((((..(((((&)))))...)).)))))))).	747	767	1	-20.1	1	0.224237	0.544	1.67581	1.48782	-13.8986	15	20	8	3UTR		0	0
mmu-miR-449a-5p	NM_026693	Gabarapl2	((((((.((((((.((((((((&.))))))))....)))).)).)))))).	491	547	1	-21	1	0.00136516	0.544	0.750234	2.67735	-6.3381	20	28	8	3UTR		0	0
mmu-miR-483-5p	NM_026693	Gabarapl2	.(((((.(((.((.((((((.(&.).)))))))).))).))))).	483	511	1	-21	1	0.0817256	0.485	1.45076	3.18438	-9.01863	17	22	8	3UTR		0	0
mmu-miR-483-3p	NM_026693	Gabarapl2	((((((((((..((((.....&.))))...))))))).))).	763	788	1	-20.7	1	0.0509608	0.544	1.17129	1.8408	-10.1092	14	20	7	3UTR		0	0
mmu-miR-291b-5p	NM_026693	Gabarapl2	.......(((..(((((.((((&)))))))))..))).	776	791	1	-18.8	0	0.00151491	0.559	1.01548	1.8102	-23.2818	12	15	9	3UTR		0	0
mmu-miR-216b-3p	NM_026693	Gabarapl2	((((((((((.(..........&).)))))))))).	748	761	1	-15.1	1	0.109047	0.544	2.54167	1.42355	-9.87682	11	13	10	3UTR		0	0
mmu-miR-551b-3p	NM_026693	Gabarapl2	((.(.(((((((((.((((..&)))).)))))))))).)).	748	767	1	-17.9	1	0.224237	0.544	2.19435	1.4868	-10.3496	16	19	10	3UTR		0	0
mmu-miR-1249-5p	NM_026693	Gabarapl2	(((.((((((((.((.(((.(((((&))))).))).)))))))))).))).	480	505	1	-27.6	1	0.00705471	0.456	0.750234	2.67735	-8.49178	21	25	10	3UTR		0	0
mmu-miR-1843a-5p	NM_026693	Gabarapl2	..((((((.(((((.(.((..&.)).).))))))))))).	533	556	1	-19.2	1	0.00582372	0.529	0.865856	2.21113	-6.74884	14	18	11	3UTR		0	0
mmu-miR-667-5p	NM_026693	Gabarapl2	.(((.(((((((((.(.((((.(((&.))).)))).)..))))))))).))).	503	552	1	-24.7	1	0.00182427	0.544	2.33944	1.25114	-8.64781	20	27	9	3UTR		0	0
mmu-miR-667-3p	NM_026693	Gabarapl2	(.(((((((((.(((........&.))).))))))))).).	710	763	1	-22.6	1	0.134211	0.544	1.41448	1.60208	-8.6811	13	17	9	3UTR		0	0
mmu-miR-3475-3p	NM_026693	Gabarapl2	((((((((.(((.(((((...&)))))))))))))))).	698	715	1	-18.5	1	0.00111309	0.588	1.89283	1.77653	-6.28309	16	17	16	3UTR		0	0
mmu-miR-674-5p	NM_026693	Gabarapl2	((((.(((..(((((.((((((&)))))))))))..))))))).	488	509	1	-19.8	1	0.0319368	0.471	1.19231	2.95178	-10.5886	18	21	11	3UTR		0	0
mmu-miR-700-5p	NM_026693	Gabarapl2	...(((.(((((((...(((..&)))...)))))))))).	769	786	1	-16.6	1	0.0621997	0.515	0.840593	1.76327	-9.02673	13	17	10	3UTR		0	0
mmu-miR-702-3p	NM_026693	Gabarapl2	.((((.(((((((((((((.((&.)).)))).)))))))))........)))).	748	785	1	-29.3	1	0.0681731	0.529	1.77333	1.44702	-5.69428	19	31	9	3UTR		0	0
mmu-miR-707	NM_026693	Gabarapl2	(((((.(((((((.((((((.&))))))..)))))))..............))))).	752	787	1	-21.5	1	0.0564774	0.529	1.20203	1.53577	-6.69537	18	35	7	3UTR		0	0
mmu-miR-709	NM_026693	Gabarapl2	(((((((.((((((((((.&)))))))))).))))))).	494	513	1	-28.7	1	0.0851932	0.5	1.44804	2.4825	-6.25121	17	19	10	3UTR		0	0
mmu-miR-467c-3p	NM_026693	Gabarapl2	...(((.(((.(((((((((..&))))))))))))))).	752	768	1	-17.6	1	0.254454	0.529	2.33944	1.42355	-10.883	15	16	15	3UTR		0	0
mmu-miR-504-3p	NM_026693	Gabarapl2	(((((((((((((.(((((...&.)))))))))))))...))))).	480	513	1	-24	1	0.0851932	0.5	1.1277	3.01401	-4.79441	18	23	13	3UTR		0	0
mmu-miR-92b-5p	NM_026693	Gabarapl2	.((((((((.(.(((.((((....&.)))).))).)...)))))))).	669	710	1	-23.7	1	1.96411e-05	0.574	1.60718	1.7041	-8.61568	16	23	8	3UTR		0	0
mmu-miR-872-3p	NM_026693	Gabarapl2	.((((((.((((.(((((((((&.)).))))))).)))))))))).	754	798	1	-23.8	1	0.000107067	0.574	1.8153	1.4715	-7.39609	19	23	10	3UTR		0	0
mmu-miR-467e-3p	NM_026693	Gabarapl2	...(((.(((.(((((((((..&))))))))))))))).	752	768	1	-17.6	1	0.254454	0.529	2.33944	1.42355	-10.883	15	16	15	3UTR		0	0
mmu-miR-669f-5p	NM_026693	Gabarapl2	(((((((.(.(((.((((((....&.))))))))).).))))))).	637	687	1	-17.7	1	0.00753072	0.559	2.3796	2.03974	-8.35056	17	21	9	3UTR		0	0
mmu-miR-1188-5p	NM_026693	Gabarapl2	..((((((((((.((.((((.&))))))..)))))).)))).	539	559	1	-20	1	0.0173558	0.529	1.0229	2.45903	-6.47918	16	20	6	3UTR		0	0
mmu-miR-1894-5p	NM_026693	Gabarapl2	((((((((((((((((((((((&))))))))))..)))))....))))....))).	748	781	1	-28.8	1	0.257154	0.529	1.66584	1.56944	-3.93757	22	33	10	3UTR		0	0
mmu-miR-1934-5p	NM_026693	Gabarapl2	...((.(((((.(((..((((..&))))..))).))))))).	768	786	1	-18.6	1	0.0621997	0.515	0.950188	1.73981	-11.9954	14	18	7	3UTR		0	0
mmu-miR-1943-5p	NM_026693	Gabarapl2	.(((((((....(.((((((((.&)))))))).)))))))).	483	501	1	-26	1	0.00207627	0.456	1.20931	3.32414	-13.1206	16	18	8	3UTR		0	0
mmu-miR-1943-5p	NM_026693	Gabarapl2	...(((((((..((...((((((&))))))...)).))))))).	692	712	1	-23.7	1	0.000142487	0.574	1.15539	1.82448	-13.6546	15	20	7	3UTR		0	0
mmu-miR-1306-5p	NM_026693	Gabarapl2	(((((((((((............&))))))).)))).	747	767	1	-19.8	1	0.224237	0.544	2.19889	1.43987	-10.3988	11	13	7	3UTR		0	0
mmu-miR-1306-3p	NM_026693	Gabarapl2	..(..(((((((((((((((.&))))))..)))))))))..).	534	555	1	-22.7	1	0.00382616	0.529	0.746635	2.18358	-12.1081	16	21	9	3UTR		0	0
mmu-miR-1947-3p	NM_026693	Gabarapl2	.((((..(((.((.((((((..&)))))))).)))..)))).	746	765	1	-19.8	1	0.168552	0.529	2.2533	1.32765	-10.9196	15	19	8	3UTR		0	0
mmu-miR-1951	NM_026693	Gabarapl2	((.((((((.(((((((((((.&))))))...)))))...)))))))).	533	559	1	-22.7	1	0.0173558	0.529	1.05046	2.13155	-6.73762	19	26	8	3UTR		0	0
mmu-miR-1960	NM_026693	Gabarapl2	.((((((....(((((((((((&)))))))))))...)))))).	655	676	1	-19.6	1	0.0244523	0.603	1.53484	1.86631	-11.2306	17	21	11	3UTR		0	0
mmu-miR-1983	NM_026693	Gabarapl2	.((.(((((((((........&.))))))))))).	669	701	1	-19.4	1	1.15916e-05	0.574	1.58678	1.77653	-8.65069	11	13	11	3UTR		0	0
mmu-miR-2136	NM_026693	Gabarapl2	(((((((((............&))))))))).	835	845	1	-15.4	1	0.120838	0.647	1.13337	1.87294	-14.4661	9	10	9	3UTR		0	0
mmu-miR-3057-3p	NM_026693	Gabarapl2	...(((.((((((((.......&.))))))))..))).	471	491	1	-19.9	1	0.000966373	0.485	1.1073	3.45064	-8.29128	11	15	8	3UTR		0	0
mmu-miR-3060-3p	NM_026693	Gabarapl2	((((.((((....((.(((((.&)))))))..)))).)))).	747	766	1	-19.9	1	0.190354	0.529	1.66839	1.35724	-16.9929	15	19	7	3UTR		0	0
mmu-miR-3070-5p	NM_026693	Gabarapl2	(((((((..((((...(((....&.)))...))))))))))).	735	786	1	-21.9	1	0.0621997	0.515	2.27467	1.33684	-9.13294	14	19	11	3UTR		0	0
mmu-miR-3072-3p	NM_026693	Gabarapl2	((((((((((......((((..&)))).....))))))).....))).	767	792	1	-18.9	1	0.000917927	0.574	0.759756	1.81428	-13.2236	14	25	7	3UTR		0	0
mmu-miR-3075-5p	NM_026693	Gabarapl2	...(((((((((((((.....&.))))))))))))).	506	536	1	-23.4	1	6.62819e-05	0.515	2.73566	1.446	-6.51454	13	15	13	3UTR		0	0
mmu-miR-3097-5p	NM_026693	Gabarapl2	(((((((((((((.(((((.((.&))))))).))))))))))))).	486	508	1	-27.8	1	0.0260285	0.471	1.53656	2.35395	-4.79441	20	22	13	3UTR		0	0
mmu-miR-3098-3p	NM_026693	Gabarapl2	.....((((((.((((((...&)))))).)))))).	743	757	1	-18.6	1	0.0567691	0.574	1.47796	1.35622	-17.0124	12	14	6	3UTR		0	0
mmu-miR-3101-3p	NM_026693	Gabarapl2	..(((((((((((........&))))))))))).	539	551	1	-16.5	1	0.00266102	0.559	0.496118	2.14074	-6.78234	11	12	11	3UTR		0	0
mmu-miR-344b-5p	NM_026693	Gabarapl2	.((((((((.(((((........&.)))))))))).......))).	537	563	1	-18	1	0.0620727	0.559	1.08621	2.36619	-5.26888	13	22	10	3UTR		0	0
mmu-miR-344g-5p	NM_026693	Gabarapl2	.((((((((.((((((.((((&.))))))))))))))).......))).	508	563	1	-23.6	1	0.0620727	0.559	1.64119	1.48476	-5.03583	18	27	15	3UTR		0	0
mmu-miR-3110-5p	NM_026693	Gabarapl2	.((((((((((..........&)))))))))).	747	758	1	-18.3	1	0.0688527	0.574	2.19072	1.4613	-10.2546	10	11	10	3UTR		0	0
mmu-miR-1843b-5p	NM_026693	Gabarapl2	.((((((.(((((.(.((...&.)).).))))))))))).	533	556	1	-19.2	1	0.00582372	0.529	0.865856	2.21113	-7.19685	14	18	11	3UTR		0	0
mmu-miR-1843b-3p	NM_026693	Gabarapl2	...((((..(((((((....&.))))))).)))).	756	789	1	-17.7	1	0.0130657	0.559	1.48185	1.54291	-9.88456	11	14	7	3UTR		0	0
mmu-miR-3971	NM_026693	Gabarapl2	((((((..((((.(((((.(..&).))))).))))....)).)))).	760	784	1	-19.4	1	0.0852815	0.529	0.793955	1.75715	-9.08403	16	24	5	3UTR		0	0
mmu-miR-3572-3p	NM_026693	Gabarapl2	((((((((.(((((((((.....&))))))))))))))))).	744	762	1	-21.1	1	0.122806	0.544	1.91324	1.3756	-4.99396	17	18	17	3UTR		0	0
mmu-miR-1231-5p	NM_026693	Gabarapl2	(((.((((((((((.((((.((.&.)).)))))))...)))))))))).	505	549	1	-23	1	0.00180284	0.544	2.7796	1.33276	-7.70505	19	25	10	3UTR		0	0
mmu-miR-5622-5p	NM_026693	Gabarapl2	.((((((((((.(.(((.....&.))).).)))))))))).	743	766	1	-21.2	1	0.190354	0.529	2.54167	1.42355	-7.99697	14	18	10	3UTR		0	0
mmu-miR-6354	NM_026693	Gabarapl2	..(((.(((((.(((((((((&))))).))))))))).))).	695	715	1	-24.6	1	0.00111309	0.588	0.78696	1.87345	-10.2048	17	20	9	3UTR		0	0
mmu-miR-6369	NM_026693	Gabarapl2	(((((((((((((...((((...&))))..))))))))))))).	897	917	1	-20.6	1	0.00663749	0.647	2.19068	2.28753	-5.76291	17	20	13	3UTR		0	0
mmu-miR-6379	NM_026693	Gabarapl2	((((((((((............&)))))))))).	690	701	1	-19.3	1	1.15916e-05	0.574	1.06445	1.77653	-13.2236	10	11	10	3UTR		0	1
mmu-miR-6388	NM_026693	Gabarapl2	(((((.((((((((((((((.&)))))))).)....))))).))))).	871	897	1	-25.5	1	0.000492487	0.632	2.16295	2.05957	-5.83853	19	26	8	3UTR		0	0
mmu-miR-6388	NM_026693	Gabarapl2	.(((((((((.((.(((((..&)))))))))))))))).	676	693	1	-21.3	1	0.00513839	0.544	1.43262	1.69594	-7.47494	16	17	16	3UTR		0	0
mmu-miR-6391	NM_026693	Gabarapl2	.((((((((((((((......&)))).)))))))))).	496	512	1	-20.3	1	0.0851341	0.485	1.74457	2.13768	-4.02637	14	16	10	3UTR		0	0
mmu-miR-6407	NM_026693	Gabarapl2	.(((..((((((...((((((((&))))))))))))))....))).	686	708	1	-19.7	1	1.73099e-05	0.574	0.842051	1.69084	-12.6947	17	22	14	3UTR		0	0
mmu-miR-6409	NM_026693	Gabarapl2	.((..((((((((((((((....&)))))).)))))))).)).	667	686	1	-21.5	1	0.00732122	0.559	1.99485	1.82754	-10.9444	16	19	8	3UTR		0	0
mmu-miR-6418-3p	NM_026693	Gabarapl2	((((((((((((((((......&))))))))))...)))))).	744	764	1	-21	1	0.148024	0.544	2.01633	1.47762	-3.93757	16	20	10	3UTR		0	0
mmu-miR-6897-5p	NM_026693	Gabarapl2	(((((((((((.((((.......&))))))))))))))).	666	682	1	-23.5	1	0.0146036	0.588	1.91324	1.81428	-7.28438	15	16	15	3UTR		0	0
mmu-miR-6898-5p	NM_026693	Gabarapl2	....((((((.((((((((((.&))))))))..)).)))))).	494	514	1	-20.2	1	0.0848888	0.5	1.58678	2.37436	-12.3713	16	20	8	3UTR		0	0
mmu-miR-6903-3p	NM_026693	Gabarapl2	((((((((.((((((((...&)))))))).)))))))).	776	794	1	-17.4	1	0.000626037	0.544	0.750234	1.79898	-4.99396	16	18	8	3UTR		0	0
mmu-miR-6905-5p	NM_026693	Gabarapl2	...(((((((..((((.......&))))..))))))).	491	505	1	-19	1	0.00705471	0.456	1.97153	2.32233	-12.6861	11	14	7	3UTR		0	0
mmu-miR-6909-5p	NM_026693	Gabarapl2	(((((((((.((((.(((((((&))))).)).)))).))).....)))))).	486	515	1	-23	1	0.0860766	0.485	2.09395	1.88569	-5.91553	20	29	6	3UTR		0	0
mmu-miR-6916-3p	NM_026693	Gabarapl2	.(((((((((((.(((((....&.))))).))).)))))))).	743	788	1	-19.1	1	0.0509608	0.544	2.2533	1.44906	-5.08246	16	20	8	3UTR		0	0
mmu-miR-6919-3p	NM_026693	Gabarapl2	(((((((((.....(((....&)))...))))))))).	769	785	1	-22.2	1	0.0681731	0.529	0.815979	1.8204	-13.4976	12	16	9	3UTR		0	0
mmu-miR-6921-5p	NM_026693	Gabarapl2	.(((((((((.((((((((((.&.))))))))))))))))))).	482	514	1	-25.6	1	0.0848888	0.5	1.15423	3.27925	-6.6181	19	21	19	3UTR		0	0
mmu-miR-6921-3p	NM_026693	Gabarapl2	..(((((((((((((((((..&)))))))))).).)))))).	747	767	1	-22.6	1	0.224237	0.544	1.74571	1.43783	-4.957	17	20	10	3UTR		0	0
mmu-miR-6923-5p	NM_026693	Gabarapl2	..(((((((((....(((((((..&)))))))....))))))))).	690	711	1	-26.7	1	6.36043e-05	0.559	0.81598	1.89385	-11.1852	16	21	9	3UTR		0	0
mmu-miR-6923-5p	NM_026693	Gabarapl2	..(((((((((((((..(((((((&))))))))))).))))).)))).	489	512	1	-24.3	1	0.0851341	0.485	1.74457	2.13768	-5.19005	20	23	11	3UTR		0	0
mmu-miR-6923-3p	NM_026693	Gabarapl2	.((.((((((((..((((...&.))))..)))))))).)).	759	787	1	-23	1	0.0564774	0.529	1.90303	1.68064	-8.97132	14	19	8	3UTR		0	0
mmu-miR-6925-3p	NM_026693	Gabarapl2	.((((((((.(((((...&.)))))..)))))))).	743	784	1	-18.4	1	0.0852815	0.529	2.69877	1.43477	-5.26888	13	17	8	3UTR		0	0
mmu-miR-6926-3p	NM_026693	Gabarapl2	(((((((.(((((((((....&.))))))))).))))))).	719	766	1	-23.2	1	0.190354	0.529	2.33944	1.55413	-6.25121	16	19	9	3UTR		0	0
mmu-miR-6935-5p	NM_026693	Gabarapl2	((((((((((((..(((.....&.))).)))))))).)))).	523	560	1	-27.5	1	0.0221076	0.529	1.18499	1.87753	-6.08354	15	19	8	3UTR		0	0
mmu-miR-6935-5p	NM_026693	Gabarapl2	(.(.(((((..((((..(((((&)))))..)))).))))).).).	694	716	1	-25.1	1	0.00155084	0.588	1.40723	1.86223	-12.4336	16	22	5	3UTR		0	0
mmu-miR-6936-3p	NM_026693	Gabarapl2	.((.((((((....(((((..&)))))...)))))))).	479	496	1	-20.6	1	5.45135e-06	0.471	1.40995	3.06196	-15.1429	13	17	8	3UTR		0	0
mmu-miR-6940-3p	NM_026693	Gabarapl2	(((((..((((((((((((.(..&).).))))))))))).))))).	747	769	1	-20.9	1	0.272846	0.529	2.1518	1.4613	-7.38222	18	22	11	3UTR		0	1
mmu-miR-6944-5p	NM_026693	Gabarapl2	.(((((((((((((((.(((...&))))))))).........................))))))))).	491	535	1	-23.6	1	0.000204729	0.515	1.91528	2.5335	-3.79332	18	44	9	3UTR		0	0
mmu-miR-6945-5p	NM_026693	Gabarapl2	((((((..(((((((.((((((&))))))...))))))))))))).	693	716	1	-27.9	1	0.00155084	0.588	0.350908	1.83264	-8.02794	19	23	13	3UTR		0	0
mmu-miR-6945-3p	NM_026693	Gabarapl2	.(((.((((.((((((((...&.)))))))).)).)).))).	747	795	1	-22.2	1	0.000455393	0.544	2.20909	1.44089	-9.15487	15	20	8	3UTR		0	0
mmu-miR-6947-3p	NM_026693	Gabarapl2	.((((((((((((((.......&)))))....))))))))).	768	787	1	-21.8	1	0.0564774	0.529	1.16964	1.92242	-4.02637	14	19	9	3UTR		0	0
mmu-miR-6950-5p	NM_026693	Gabarapl2	(((((((((((((((((((((.(&.).)).))))))))).........)))))))))).	653	700	1	-29.8	1	5.31286e-06	0.559	2.03697	1.84794	-3.93757	22	35	10	3UTR		0	0
mmu-miR-6950-5p	NM_026693	Gabarapl2	..((((((((((((((((((((.&))))))))))))...))))...)))).	521	548	1	-25.8	1	0.00144559	0.544	1.0971	1.80816	-4.957	20	27	12	3UTR		0	0
mmu-miR-6952-3p	NM_026693	Gabarapl2	(((((.((((((((((((....&.))))))))).......)))..))))).	726	774	1	-22.4	1	0.614754	0.515	1.34194	1.32561	-5.83853	17	28	9	3UTR		0	0
mmu-miR-6953-5p	NM_026693	Gabarapl2	((((((((.(((((((((........&.))))))))).)))))))).	489	514	1	-26.1	1	0.0848888	0.5	0.988276	2.77937	-4.99396	17	20	9	3UTR		0	0
mmu-miR-6954-5p	NM_026693	Gabarapl2	((((((((((.(((((((((..&))))))))).))))....)))))).	672	697	1	-26	1	8.11315e-05	0.574	1.59844	1.74593	-6.76235	19	25	9	3UTR		0	0
mmu-miR-6954-5p	NM_026693	Gabarapl2	...(((((..((((((((((..&)))))))))).....))))).	525	546	1	-23.1	1	0.00101315	0.544	1.33378	1.6082	-8.81344	15	21	10	3UTR		0	0
mmu-miR-6955-3p	NM_026693	Gabarapl2	(((((((((((((((.......&))))))))))))))).	745	761	1	-20.8	1	0.109047	0.544	2.29954	1.40519	-4.17062	15	16	15	3UTR		0	0
mmu-miR-6956-3p	NM_026693	Gabarapl2	....((((((.(((((((..&))))...))).)))))).	769	787	1	-17.5	1	0.0564774	0.529	1.244	1.77449	-12.3713	13	18	6	3UTR		0	0
mmu-miR-6958-3p	NM_026693	Gabarapl2	((((((.(((((((((((((((.&)))))))))).........))))))))))).	757	788	1	-28.4	1	0.0509608	0.544	1.36234	1.71532	-5.48126	21	31	11	3UTR		0	0
mmu-miR-6962-3p	NM_026693	Gabarapl2	((((.((((((((...((((..&.))))...)))))))).)))).	752	790	1	-24.8	1	0.00217051	0.544	1.1583	1.56332	-9.88195	16	22	8	3UTR		0	0
mmu-miR-3547-5p	NM_026693	Gabarapl2	..(((((((((((((((((.((...&)).)))...)))))))))))))).	909	934	1	-18.9	1	0.0492764	0.735	2.11172	2.19294	-4.957	19	24	14	3UTR		0	0
mmu-miR-3547-5p	NM_026693	Gabarapl2	((((((((.((.((..(((((((.(&).)))))))....)).)))))))))).	476	503	1	-30.3	1	0.00382898	0.471	1.1481	2.50086	-9.30927	20	27	10	3UTR		0	0
mmu-miR-3547-3p	NM_026693	Gabarapl2	...(((.((((((((((((..&))))....)))))).)).))).	769	791	1	-20.2	1	0.00151491	0.559	1.06349	1.93874	-8.05823	15	22	6	3UTR		0	0
mmu-miR-6967-5p	NM_026693	Gabarapl2	(((((((((....((.(((((&))))).)).......))))))))).	477	502	1	-22.1	1	0.0024543	0.456	0.670887	2.66511	-12.8738	16	25	9	3UTR		0	0
mmu-miR-6969-5p	NM_026693	Gabarapl2	..(((((((((((((((.....&)))))))...)))))))).	526	545	1	-20.3	1	0.0008303	0.529	1.02002	1.86121	-4.957	15	19	8	3UTR		0	0
mmu-miR-6970-3p	NM_026693	Gabarapl2	((((((((((..((((.....&.)))).))).))))))).	690	763	1	-19.8	1	0.134211	0.544	0.59999	1.95404	-10.1092	14	18	7	3UTR		0	0
mmu-miR-6971-5p	NM_026693	Gabarapl2	..((((((((((((......&)))))))))))).	488	501	1	-20.8	1	0.00207627	0.456	1.08349	2.91097	-5.9255	12	13	12	3UTR		0	0
mmu-miR-6971-3p	NM_026693	Gabarapl2	.((((((((.(((.(((((..&.)))))))).)))))))).	747	787	1	-23.5	1	0.0564774	0.529	1.37254	1.53679	-5.89267	16	19	8	3UTR		0	0
mmu-miR-6972-5p	NM_026693	Gabarapl2	((.(((((((((.(((((.....&)))))))))))))).)).	498	516	1	-22.1	1	0.0929194	0.471	1.7228	1.76633	-6.78424	16	18	14	3UTR		0	0
mmu-miR-6972-3p	NM_026693	Gabarapl2	(((((((((((((((((....&))))))))))))))))).	748	766	1	-19.5	1	0.190354	0.529	1.89403	1.41437	-3.93757	17	18	17	3UTR		0	0
mmu-miR-6973a-5p	NM_026693	Gabarapl2	((((((((((((((((.(.(((&))).).))))))))))))).))).	484	508	1	-25.3	1	0.0260285	0.471	1.43315	2.59574	-3.93757	20	24	13	3UTR		0	0
mmu-miR-6975-3p	NM_026693	Gabarapl2	((((((((((.((((.....&)))).)))))))))).	768	784	1	-17.3	1	0.0852815	0.529	0.990996	1.8102	-6.9954	14	16	10	3UTR		0	0
mmu-miR-6976-3p	NM_026693	Gabarapl2	((((((((((....((((...&.))))...)))))))..))).	747	789	1	-18.8	1	0.0130657	0.559	1.87923	1.50108	-12.2551	14	21	7	3UTR		0	0
mmu-miR-6980-5p	NM_026693	Gabarapl2	(((((..((((((((.(((...&)))..))))))).).....))))).	542	567	1	-23.2	1	0.0363704	0.588	0.716229	2.41312	-7.61527	16	25	7	3UTR		0	0
mmu-miR-6980-3p	NM_026693	Gabarapl2	..(((((((((((.......&))))))))))).	747	759	1	-18.2	1	0.0824306	0.574	2.11356	1.42661	-6.78234	11	12	11	3UTR		0	0
mmu-miR-6982-5p	NM_026693	Gabarapl2	(((((((((.....((((..(((((&)))))..))))))))))))).	693	714	1	-25.4	1	0.00071617	0.588	1.45982	1.76021	-13.4976	18	21	13	3UTR		0	0
mmu-miR-6983-5p	NM_026693	Gabarapl2	..((((((((.((((.......&)))).)))))))).	486	500	1	-20.8	1	0.000662973	0.441	0.801243	2.74774	-8.01482	12	14	8	3UTR		0	0
mmu-miR-6988-5p	NM_026693	Gabarapl2	(((((((((.(((..(((...&)))..))))))))).....))).	542	565	1	-21.7	1	0.156974	0.574	1.16122	2.43251	-6.77237	15	23	9	3UTR		0	0
mmu-miR-6989-5p	NM_026693	Gabarapl2	.(((((((((..((((((((..&.)))))))).))))))))).	654	682	1	-25.4	1	0.0146036	0.588	2.04926	1.85305	-9.9649	17	20	9	3UTR		0	0
mmu-miR-6990-3p	NM_026693	Gabarapl2	((((((.(((.(((((.....&.))))).))).)))))).	762	786	1	-21.5	1	0.0621997	0.515	1.09709	1.75307	-8.30604	14	18	6	3UTR		0	0
mmu-miR-6991-3p	NM_026693	Gabarapl2	.(((((((((.((.(((((...&.))))))).))))))))).	748	787	1	-22	1	0.0564774	0.529	1.25126	1.55311	-7.47494	16	19	9	3UTR		0	0
mmu-miR-6992-5p	NM_026693	Gabarapl2	...(((((.(((((((((.((((&)))).))))))....)))))))).	537	561	1	-22.1	1	0.0270693	0.544	0.73297	2.24683	-7.57093	18	24	8	3UTR		0	0
mmu-miR-6994-5p	NM_026693	Gabarapl2	.(((((...((((((((.((((.&)))).))))))))...))))).	866	888	1	-21.4	1	0.0124072	0.603	1.93549	1.96952	-8.70704	17	22	8	3UTR		0	0
mmu-miR-6995-3p	NM_026693	Gabarapl2	((((((((((((((.......&))))))))..)))))).	775	792	1	-18	1	0.000917927	0.574	0.796142	1.8357	-4.90607	14	17	8	3UTR		0	0
mmu-miR-6999-5p	NM_026693	Gabarapl2	.(((((((.(.(.((.(.(((..&))).).))).)))))))).	482	501	1	-19.3	1	0.00207627	0.456	0.840592	2.61308	-9.19667	15	19	8	3UTR		0	0
mmu-miR-6999-3p	NM_026693	Gabarapl2	((.((.(((.(((((((((...&)))))))))))).)).)).	744	763	1	-21.5	1	0.134211	0.544	1.91324	1.3756	-8.63858	16	19	12	3UTR		0	0
mmu-miR-6999-3p	NM_026693	Gabarapl2	..((((((..((((((((((.(&).))))).))))))))))).	768	788	1	-20.9	1	0.0509608	0.544	1.13419	1.85713	-7.2559	17	20	11	3UTR		0	0
mmu-miR-7000-5p	NM_026693	Gabarapl2	(((((((((((.((((((((((&.)))).))))))..))))))))))).	664	712	1	-30.4	1	0.000142487	0.574	2.27679	1.76123	-7.28438	21	26	11	3UTR		0	0
mmu-miR-7000-3p	NM_026693	Gabarapl2	(((((((((((((.((((.((.&.)).))))))))))))).)))).	709	765	1	-28.5	1	0.168552	0.529	1.97153	1.55209	-4.79441	19	23	13	3UTR		0	0
mmu-miR-7001-5p	NM_026693	Gabarapl2	.(((((((((((((....(((..&.)))...))))..))))))))).	499	546	1	-22.4	1	0.00101315	0.544	2.70761	1.55413	-4.76182	16	23	9	3UTR		0	0
mmu-miR-7001-5p	NM_026693	Gabarapl2	.(((((((((((((....(((..&)))...))))..))))))))).	524	546	1	-22.7	1	0.00101315	0.544	1.22768	2.02137	-4.76182	16	22	9	3UTR		0	0
mmu-miR-6973b-5p	NM_026693	Gabarapl2	((((((.(((((((.((.(((((.&))))))).....)))).).)).)))))).	538	567	1	-22.6	1	0.0363704	0.588	1.13337	2.45393	-6.21671	20	29	7	3UTR		0	0
mmu-miR-7004-3p	NM_026693	Gabarapl2	..((.(((((((((..(.(..&).)..))))))))).)).	769	787	1	-18.7	1	0.0564774	0.529	0.942934	1.78878	-10.0445	13	18	9	3UTR		0	0
mmu-miR-7008-5p	NM_026693	Gabarapl2	...(((((((((((((((.(((((&)))))...))))))...))))))))).	487	514	1	-21.7	1	0.0848888	0.5	1.66386	2.1591	-6.51454	20	27	9	3UTR		0	0
mmu-miR-7011-3p	NM_026693	Gabarapl2	(((((((((((..........&))))))))))).	746	758	1	-16.5	1	0.0688527	0.574	2.46228	1.43171	-10.3988	11	12	11	3UTR		0	0
mmu-miR-7012-5p	NM_026693	Gabarapl2	..(..((((..((((((((((((&)))..)))))))))..))))..).	533	557	1	-23	1	0.00927263	0.529	1.05046	2.13155	-16.1753	17	24	9	3UTR		0	0
mmu-miR-7012-3p	NM_026693	Gabarapl2	.((.((((((((((((((((..&.))))....))))))).....))))).)).	747	798	1	-22.1	1	0.000107067	0.574	1.85121	1.51027	-6.82535	18	30	7	3UTR		0	0
mmu-miR-7014-3p	NM_026693	Gabarapl2	((((((((.((((.((((((.&.))))))))))...)))...))))).	751	782	1	-20	1	0.309334	0.529	1.67581	1.62351	-5.8508	18	26	10	3UTR		0	0
mmu-miR-7016-5p	NM_026693	Gabarapl2	((((((((((((((((.((..&)).))))))..........).))))))))).	471	502	1	-22.1	1	0.0024543	0.456	1.00339	3.47921	-3.93757	18	31	9	3UTR		0	0
mmu-miR-7019-3p	NM_026693	Gabarapl2	(((((...(((((((((((.((.&)).)))))))).)))..))))).	743	766	1	-23.4	1	0.190354	0.529	2.36891	1.39703	-9.69585	18	23	8	3UTR		0	0
mmu-miR-7020-5p	NM_026693	Gabarapl2	.((..((((((((((((((((...&))))))))........)))))).))..)).	534	564	1	-23.2	1	0.105756	0.559	0.924073	2.42026	-10.9444	18	30	8	3UTR		0	0
mmu-miR-7021-3p	NM_026693	Gabarapl2	...((((((.((.(((((((..&))))))).)).)))))).	777	795	1	-21.7	1	0.000455393	0.544	0.782296	1.78775	-9.04618	15	18	7	3UTR		0	0
mmu-miR-7024-5p	NM_026693	Gabarapl2	((((((((((((((.(((((.&))))).)))))))))))))).	693	714	1	-27.3	1	0.00071617	0.588	1.16705	1.92446	-4.67302	19	21	14	3UTR		0	0
mmu-miR-7024-5p	NM_026693	Gabarapl2	..(.((((.((((((((((((&)))))))).)))).)))).).	482	503	1	-22.7	1	0.00382898	0.471	1.05943	3.29048	-9.04541	17	21	8	3UTR		0	0
mmu-miR-7024-3p	NM_026693	Gabarapl2	((((((((((((.((((((....&.)))))...).))))))))..........)))).	743	801	1	-25.8	1	0.000170061	0.588	1.72404	1.54903	-5.22671	18	34	8	3UTR		0	0
mmu-miR-7026-3p	NM_026693	Gabarapl2	.(((((((.(((((((((((...&))))))).))))))))))).	821	841	1	-18.1	1	0.0427098	0.662	1.77721	1.85747	-4.84971	18	20	11	3UTR		0	0
mmu-miR-7027-3p	NM_026693	Gabarapl2	((((...((((((((.((((..&)))).)))))))))))).	770	788	1	-19.6	1	0.0509608	0.544	0.862453	1.77857	-11.7343	16	18	12	3UTR		0	0
mmu-miR-7033-3p	NM_026693	Gabarapl2	(((((((.(((...((((...&))))....))).))))))).	736	756	1	-16.9	1	0.0429797	0.574	2.00651	1.41539	-11.744	14	20	7	3UTR		0	0
mmu-miR-7035-5p	NM_026693	Gabarapl2	((((((.(((((((((.((((&)))).))))))))).)))..))).	528	552	1	-25.2	1	0.00182427	0.544	1.07896	2.0224	-5.48126	19	24	9	3UTR		0	0
mmu-miR-7038-3p	NM_026693	Gabarapl2	((((((.(((((((((((.((.&.)).))))))))))).)))))).	726	765	1	-26.9	1	0.168552	0.529	1.30484	1.35826	-5.48126	19	23	11	3UTR		0	0
mmu-miR-7042-3p	NM_026693	Gabarapl2	.(((((((..((((((((...&.)))))))).))))))).	743	785	1	-19.5	1	0.0681731	0.529	1.85203	1.36642	-6.09222	15	18	8	3UTR		0	0
mmu-miR-7043-3p	NM_026693	Gabarapl2	(((((((((((((.(((((..&))))).))))))))......))))).	770	796	1	-18.6	1	0.000300868	0.559	0.817887	1.71838	-4.79441	18	26	8	3UTR		0	0
mmu-miR-7044-5p	NM_026693	Gabarapl2	((((((.(((..((((((.&))))))..))).)))))).	540	559	1	-27.1	1	0.0173558	0.529	0.566603	2.0428	-11.6528	15	19	6	3UTR		0	0
mmu-miR-7045-5p	NM_026693	Gabarapl2	.((((((.(((((((((.(((&))).).)))))))))))))).	486	507	1	-22.4	1	0.020437	0.456	1.02364	2.78549	-6.10696	18	21	14	3UTR		0	0
mmu-miR-7046-5p	NM_026693	Gabarapl2	.((((((((..((((((((((((.&)))))...))))))))))))))).	521	545	1	-26.5	1	0.0008303	0.529	1.3365	1.54801	-7.86061	20	24	15	3UTR		0	0
mmu-miR-7048-3p	NM_026693	Gabarapl2	((((((.(((((((((((((.&.))).)).))))))))..)))))).	747	783	1	-21	1	0.117347	0.529	2.07646	1.4613	-5.48126	19	25	8	3UTR		0	0
mmu-miR-7049-3p	NM_026693	Gabarapl2	..((((((((.((((((.((.&)).)))))...........).)))))))).	757	787	1	-22.1	1	0.0564774	0.529	0.882857	1.84693	-7.78178	16	30	8	3UTR		0	0
mmu-miR-7056-5p	NM_026693	Gabarapl2	((((((((.((.(((((.....&.)))))))....)))))))).	491	558	1	-22.3	1	0.0129646	0.529	1.60718	1.8204	-8.34077	15	21	8	3UTR		0	0
mmu-miR-7056-3p	NM_026693	Gabarapl2	((.((((((((((((..((...&))..)))))))))))).)).	743	763	1	-23	1	0.134211	0.544	2.19889	1.43987	-5.72816	16	20	12	3UTR		0	0
mmu-miR-7058-5p	NM_026693	Gabarapl2	(((((((.((((..((.(((.(((&.)))))).)).)))).))))))).	683	713	1	-28	1	0.000380612	0.574	0.45584	1.84693	-8.39718	19	24	7	3UTR		0	0
mmu-miR-7058-3p	NM_026693	Gabarapl2	.....((((((((((.((((..&.)))))))))))))).	709	784	1	-17.9	1	0.0852815	0.529	1.28481	1.64697	-13.8986	14	16	14	3UTR		0	0
mmu-miR-7062-5p	NM_026693	Gabarapl2	(((((((...((.((((((((.((&.)).)))))))).)).))))))).	523	556	1	-23.5	1	0.00582372	0.529	1.20931	1.6888	-9.83924	19	24	8	3UTR		0	0
mmu-miR-7063-5p	NM_026693	Gabarapl2	.(.(((((.((((((((((((..&))))).))....)))))))))).).	689	714	1	-21.1	1	0.00071617	0.588	0.746634	1.72042	-6.40725	18	25	10	3UTR		0	0
mmu-miR-7066-5p	NM_026693	Gabarapl2	(((((((((...((.((((((.&))))))))...))).......)))))).	538	566	1	-17.7	1	0.0383214	0.574	1.00528	2.49882	-12.0871	17	28	8	3UTR		0	0
mmu-miR-7067-5p	NM_026693	Gabarapl2	.((((((((.((.(((((..((.&))..))))))))))))))).	483	503	1	-24.9	1	0.00382898	0.471	1.1481	2.50086	-6.32496	17	20	15	3UTR		0	0
mmu-miR-7070-3p	NM_026693	Gabarapl2	(((.((((((((((((....&)))))..))))))).))).	768	787	1	-23.9	1	0.0564774	0.529	1.26615	1.8	-6.9696	15	19	7	3UTR		0	0
mmu-miR-7072-3p	NM_026693	Gabarapl2	.(((((((((((.(((((...&.))))).))))))))))).	709	787	1	-23.2	1	0.0564774	0.529	1.8984	1.598	-5.08246	16	19	11	3UTR		0	0
mmu-miR-7074-5p	NM_026693	Gabarapl2	.((((((.(((...(((.(((((&))))))))......))))))))).	477	501	1	-23.6	1	0.00207627	0.456	0.974673	2.54371	-11.5997	17	24	9	3UTR		0	0
mmu-miR-7074-3p	NM_026693	Gabarapl2	..((((.((((((.(((((....&.)))))..)))))))))).	757	786	1	-22.4	1	0.0621997	0.515	1.682	1.63371	-7.35753	15	19	10	3UTR		0	0
mmu-miR-7076-3p	NM_026693	Gabarapl2	..((((((((((((((((...&.))))))))...)))))))).	709	767	1	-21.2	1	0.224237	0.544	1.71994	1.66227	-4.957	16	21	8	3UTR		0	0
mmu-miR-7082-5p	NM_026693	Gabarapl2	(((((((((((((.((.(...&.).))))))))))))))).	473	508	1	-25.5	1	0.0260285	0.471	1.29799	3.418	-4.79441	16	19	15	3UTR		0	0
mmu-miR-7088-5p	NM_026693	Gabarapl2	(((((((((.(((((((.((...((&.))...)).))))))).))))))))).	644	693	1	-29.8	1	0.00513839	0.544	1.65933	1.86835	-5.18008	20	27	9	3UTR		0	0
mmu-miR-7088-3p	NM_026693	Gabarapl2	...((((((((.((((((....&.)))))).)))))))).	712	755	1	-20.1	1	0.0293178	0.574	2.46413	1.57046	-9.86134	14	17	8	3UTR		0	0
mmu-miR-7090-5p	NM_026693	Gabarapl2	((((((((.((((...((..(((&)))..))...))))..)))))))).	691	716	1	-19.3	1	0.00155084	0.588	1.84182	1.74593	-6.8193	17	25	8	3UTR		0	1
mmu-miR-7094-1-5p	NM_026693	Gabarapl2	(((..((((((..((((.(((..&))).)))))))))).))).	697	716	1	-18.1	1	0.00155084	0.588	1.32833	1.81734	-15.7246	16	19	10	3UTR		0	0
mmu-miR-7117-5p	NM_026693	Gabarapl2	..((((((((((((((((((((&))))))))))).........))))))))).	526	556	1	-27.5	1	0.00582372	0.529	0.92261	2.11115	-4.957	20	30	11	3UTR		0	0
mmu-miR-7117-5p	NM_026693	Gabarapl2	(((((((....(((((((((((&))))))))..))).....))))))).	673	699	1	-22.5	1	3.54766e-06	0.559	2.19575	1.76225	-11.3749	18	26	8	3UTR		0	0
mmu-miR-7211-3p	NM_026693	Gabarapl2	.((((..((.(((((((((.(((&))).)))))))))..))..)))).	489	513	1	-23	1	0.0851932	0.5	1.02455	2.57023	-8.48048	18	24	9	3UTR		0	0
mmu-miR-7212-5p	NM_026693	Gabarapl2	..(((((((((...(((((((&)))))))))))))))).	539	556	1	-23	1	0.00582372	0.529	0.652751	2.35191	-10.4498	16	17	16	3UTR		0	0
mmu-miR-7214-3p	NM_026693	Gabarapl2	.((((((((..((((((.(.(((.&.))).).)))))....)..)))))))).	738	788	1	-24.2	1	0.0509608	0.544	1.37254	1.53679	-7.86061	18	28	8	3UTR		0	0
mmu-miR-7216-5p	NM_026693	Gabarapl2	(((((..((((((((((((((((.&.)))).........))).)))))))))..).)))).	478	556	1	-27.9	1	0.00582372	0.529	1.24463	3.18642	-7.38222	21	36	9	3UTR		0	0
mmu-miR-7222-3p	NM_026693	Gabarapl2	((((((((((.(..(.(((((((&)))))))...)..))))))))...))).	688	716	1	-24.9	1	0.00155084	0.588	1.22893	1.80612	-9.14137	19	28	8	3UTR		0	0
mmu-miR-7222-3p	NM_026693	Gabarapl2	.(((((((((((.(((((((...&))))))).)))))))))...)).	662	685	1	-23.5	1	0.00325294	0.559	2.01234	1.86835	-5.08246	18	23	9	3UTR		0	0
mmu-miR-7224-5p	NM_026693	Gabarapl2	(.((.((((((((........&)))))))).)).).	777	791	1	-20.1	1	0.00151491	0.559	0.903261	1.8153	-11.0456	11	14	8	3UTR		0	0
mmu-miR-7224-3p	NM_026693	Gabarapl2	....((.(((((((..(((..&))).....))))))).)).	696	715	1	-18.7	1	0.00111309	0.588	1.15539	1.82448	-12.0587	12	19	7	3UTR		0	0
mmu-miR-7239-3p	NM_026693	Gabarapl2	.((((((....(((((((((&)))).))))))))))).	535	552	1	-20.3	1	0.00182427	0.544	0.827769	2.06116	-11.2306	15	17	11	3UTR		0	0
mmu-miR-7654-3p	NM_026693	Gabarapl2	(((((((((((((((((.((((&)))).))))))))...))))))))).	480	506	1	-34.8	1	0.0104769	0.456	1.28481	3.02217	-3.93757	21	26	9	3UTR		0	0
mmu-miR-7665-5p	NM_026693	Gabarapl2	(((((((((((((((...(((..&))).)))))))))...)))))).	491	514	1	-22.4	1	0.0848888	0.5	1.66386	2.1591	-4.17062	18	23	9	3UTR		0	0
mmu-miR-7666-5p	NM_026693	Gabarapl2	((((((.(((((((((......&)))))))))....)))))).	669	689	1	-22.9	1	0.00847868	0.544	2.02206	1.7194	-5.48126	15	20	9	3UTR		0	0
mmu-miR-7666-3p	NM_026693	Gabarapl2	(((((((.(((.(((((..&.)))))....)))))))))).	478	510	1	-18.8	1	0.051559	0.471	0.549113	2.76917	-9.59801	15	21	10	3UTR		0	0
mmu-miR-7667-5p	NM_026693	Gabarapl2	..((((((.(((((.(((((..&)))).).)))).).)))))).	746	767	1	-20.3	1	0.224237	0.544	0.716228	1.52251	-6.74884	16	21	6	3UTR		0	1
mmu-miR-7669-5p	NM_026693	Gabarapl2	..(((((((((((..(.(((((.&))))).)..))))))))))).	747	768	1	-22.3	1	0.254454	0.529	1.72033	1.50823	-6.54929	17	21	11	3UTR		0	0
mmu-miR-3569-5p	NM_026693	Gabarapl2	.(((((((((((((.(((((.&))))))))))))).....))))).	520	544	1	-23.4	1	0.000492958	0.529	1.06989	1.81938	-4.52877	18	24	13	3UTR		0	0
mmu-miR-3569-3p	NM_026693	Gabarapl2	(((((((...(((((.(((...&)))..)))))))))))).	770	788	1	-18.6	1	0.0509608	0.544	0.805615	1.86325	-8.78315	15	18	12	3UTR		0	0
mmu-miR-7674-5p	NM_026693	Gabarapl2	.(((((.((((((((((((((((.&))))))))).....)))).))).)........)))).	674	711	1	-25.8	1	6.36043e-05	0.559	1.7463	1.79592	-5.33701	21	37	9	3UTR		0	0
mmu-miR-7679-3p	NM_026693	Gabarapl2	(((((....((((((((..(((((&)))))....)))..)))))))))).	477	502	1	-23.2	1	0.0024543	0.456	0.844092	3.09358	-10.7522	18	25	10	3UTR		0	0
mmu-miR-6715-3p	NM_026693	Gabarapl2	((..((((.((.(((((.(..&).))))).)).)))))).	748	766	1	-18.5	1	0.190354	0.529	2.25602	1.42559	-12.9303	14	18	6	3UTR		0	0
mmu-miR-216c-3p	NM_026693	Gabarapl2	((((((.(((...(((((((...&)))))))...)))...)))))).	747	770	1	-18	1	0.325153	0.529	1.91324	1.37968	-12.942	16	23	7	3UTR		0	0
mmu-miR-7685-3p	NM_026693	Gabarapl2	..(((((((..(((((.((..&))..)))))))))))).	473	490	1	-18.3	1	0.00195608	0.471	1.24866	3.44452	-9.02428	14	17	12	3UTR		0	0
mmu-miR-7686-5p	NM_026693	Gabarapl2	..(((((..(((((((((((..(((&)))....)))))))).......)))..))))).	683	716	1	-25	1	0.00155084	0.588	0.711695	1.84284	-8.32703	19	33	8	3UTR		0	0
mmu-miR-7687-5p	NM_026693	Gabarapl2	.((((((((((..(((((((((((.&))))))))))).......................))).))))))).	500	546	1	-28.8	1	0.00101315	0.544	1.80936	1.97547	-8.42926	21	46	11	3UTR		0	0
mmu-miR-8092	NM_026693	Gabarapl2	(((((((((.(((..((.(((&)))))..))).))))))))).	804	825	1	-20.7	1	0.00154934	0.662	1.62305	1.78099	-6.77237	17	21	9	3UTR		0	0
mmu-miR-8093	NM_026693	Gabarapl2	....(((((((((((((((..&)))))).))..))))))).	677	696	1	-19.5	1	0.000245387	0.574	1.68653	1.81428	-9.54656	15	19	7	3UTR		0	0
mmu-miR-8100	NM_026693	Gabarapl2	..((((((((((((((((((((.&))))))))).))))))...............))))).	497	534	1	-23.1	1	0.000503452	0.515	2.02206	2.31519	-4.957	20	37	9	3UTR		0	0
mmu-miR-8116	NM_026693	Gabarapl2	...((((((((((((((((((&))))))...)))))))))))).	782	804	1	-19.7	1	0.000160775	0.618	1.3808	1.74389	-6.51454	18	22	12	3UTR		0	0
mmu-miR-8116	NM_026693	Gabarapl2	.((((...(((((((.(((((&))))).)).))))))))).	482	501	1	-19.3	1	0.00207627	0.456	0.842051	2.9477	-9.78465	16	19	9	3UTR		0	0
mmu-miR-3552	NM_026693	Gabarapl2	..((((((.(((.((((((((&)))))))).))).)).)))).	746	767	1	-22.4	1	0.224237	0.544	2.32131	1.3501	-7.30252	17	21	8	3UTR		0	0
mmu-miR-9768-3p	NM_026693	Gabarapl2	.((((((((((((((.(((.....&)))..)))))))))))))).	737	757	1	-22.5	1	0.0567691	0.574	2.00651	1.44395	-4.02637	17	20	14	3UTR		0	0
mmu-miR-12183-5p	NM_026693	Gabarapl2	(((((((((...((((..&))))...))))))))).	768	785	1	-16.1	1	0.0681731	0.529	0.815979	1.8204	-11.3517	13	17	9	3UTR		0	0
mmu-miR-12184-5p	NM_026693	Gabarapl2	..((((((((((.(((((((..&.))))))).)))))..))))).	523	574	1	-23.5	1	0.0116763	0.632	1.06309	2.04688	-6.24613	17	22	7	3UTR		0	0
mmu-miR-12191-3p	NM_026693	Gabarapl2	(((.((((((......(((((&)))))....))))))))).	681	700	1	-21.9	1	5.31286e-06	0.559	1.05629	1.69492	-16.2556	14	19	9	3UTR		0	0
mmu-miR-12193-5p	NM_026693	Gabarapl2	.(((((((((...(((((.(((&))))))))))))))))).	524	542	1	-18.8	1	0.0352597	0.529	1.27846	1.99077	-11.254	17	18	17	3UTR		0	0
mmu-miR-12193-3p	NM_026693	Gabarapl2	..(((((((((((.((((...&.))))..))))))))))).	743	787	1	-23.2	1	0.0564774	0.529	2.3584	1.41743	-5.81384	15	19	11	3UTR		0	0
mmu-miR-12201-3p	NM_026693	Gabarapl2	(((.(((((((((((((((..&))))))))...).))))))))).	693	716	1	-21.4	1	0.00155084	0.588	1.23025	1.97241	-6.9696	18	23	9	3UTR		0	0
mmu-miR-12201-3p	NM_026693	Gabarapl2	((((..(((((((...((((.&)))))))))))....)))).	542	562	1	-19.7	1	0.0324625	0.544	0.724002	2.28968	-11.7829	15	20	11	3UTR		0	0
mmu-miR-127-5p	NM_181414	Pik3c3	.(((.((((((((((.......&.)))))))))).))).	3110	3140	1	-22.4	1	0.00184079	0.759	0.822155	-0.0297911	-8.14541	13	16	10	3UTR		0	0
mmu-miR-300-3p	NM_181414	Pik3c3	(((((((((((((((((.....&.)))))...)))))))))))).	2857	2895	1	-24.1	1	0.00191213	0.471	0.137939	0.32316	-3.93757	17	22	12	3UTR		0	0
mmu-miR-27a-3p	NM_181414	Pik3c3	..((((((((((...((((..&)))).)))))))).)).	2796	2813	1	-18.7	1	0.000573753	0.574	0.388653	0.280659	-7.83842	14	17	8	3UTR		0	0
mmu-miR-328-3p	NM_181414	Pik3c3	((((((((((((..((((....&)))).))))))))...)))).	2838	2859	1	-23	1	0.0238769	0.515	0.192509	0.255473	-6.08354	16	21	8	3UTR		0	0
mmu-miR-350-3p	NM_181414	Pik3c3	..(((((((((((..(((....&.)))..))))))))))).	2857	2885	1	-23	1	1.77152e-06	0.441	0.220747	0.300598	-6.54929	14	18	11	3UTR		0	0
mmu-miR-200c-3p	NM_181414	Pik3c3	.......((((((((..(((((.&)))))....)))))))).	2763	2781	1	-20.2	0	0.0195892	0.529	0.277511	1.44331	-17.3433	13	18	8	3UTR		0	0
mmu-miR-219a-1-3p	NM_181414	Pik3c3	.((((.((.((((((((.(((.&))))))))))).)).)).)).	2848	2869	1	-22.5	1	0.000937091	0.471	0.00466435	0.276462	-6.75067	17	21	11	3UTR		0	0
mmu-miR-223-3p	NM_181414	Pik3c3	.(((((...(((((((.((((.&))))))))))).....))))).	2752	2774	1	-20.5	1	0.0012187	0.559	0.035397	2.08364	-8.70704	16	22	11	3UTR		0	0
mmu-miR-320-5p	NM_181414	Pik3c3	((((((((((((..((((((..&.))))))..)))))))))))).	2821	2853	1	-28.7	1	0.022962	0.544	0.338727	0.178866	-6.08354	18	22	12	3UTR		0	0
mmu-miR-211-3p	NM_181414	Pik3c3	(((((((((.(((((..((((&.))))...)))))))))))))).	2852	2892	1	-27.4	1	0.000196304	0.456	0.260603	0.307944	-5.41313	18	23	14	3UTR		0	0
mmu-miR-135a-2-3p	NM_181414	Pik3c3	(((((((((.((((((..(..&.)..))))))..))))))))).	2866	2893	1	-21.8	1	0.00100822	0.456	0.0134094	0.329457	-5.18008	16	22	9	3UTR		0	0
mmu-miR-365-1-5p	NM_181414	Pik3c3	.(((((((..((((..((((((.&))))))..))))..))))))).	3117	3139	1	-22	1	0.00131911	0.745	0	0	-7.06072	17	22	7	3UTR		0	0
mmu-miR-380-5p	NM_181414	Pik3c3	.(((((((((.(((((......&.)))))))))))))).	3010	3048	1	-19.6	1	0.00168168	0.603	0.0274016	0.230287	-6.6181	14	16	14	3UTR		0	0
mmu-miR-431-3p	NM_181414	Pik3c3	..(((.((((((((((((((((&))))))).)))).........)))))))).	2798	2828	1	-21.7	1	0.0185467	0.559	0.359445	0.244979	-6.85796	19	30	8	3UTR		0	0
mmu-miR-540-5p	NM_181414	Pik3c3	....((.((((((((........&)))))))).)).	2845	2857	1	-18.9	1	0.0183658	0.529	0.0728755	0.212447	-11.3233	10	12	8	3UTR		0	0
mmu-miR-671-5p	NM_181414	Pik3c3	((.((((((((...((((((((.&)))))))).)))))))).)).	2906	2927	1	-29.5	1	0.000365028	0.5	0.49264	0.122723	-10.9879	18	21	8	3UTR		0	0
mmu-miR-667-5p	NM_181414	Pik3c3	.((.(((((..((((((((.(((..&.)))))))))))....))))))).	2867	2915	1	-29	1	0.0106745	0.5	0.183064	0.338377	-10.8926	18	24	11	3UTR		0	0
mmu-miR-3058-5p	NM_181414	Pik3c3	........((((.(((((((((.&))))))))).)))).	3032	3047	1	-20.2	0	0.00144052	0.618	0.251276	0.206151	-20.713	13	15	9	3UTR		0	0
mmu-miR-3106-5p	NM_181414	Pik3c3	(((((.(((((((((((....&)).))))))))).))))).	3029	3048	1	-18.1	1	0.00168168	0.603	0.202303	0.194083	-5.83853	16	19	9	3UTR		0	0
mmu-miR-497a-3p	NM_181414	Pik3c3	((((((...((((((.(((..&))))))))))))))).	2909	2925	1	-17.3	1	3.90366e-05	0.5	0.412185	0.129019	-9.08433	15	16	15	3UTR		0	0
mmu-miR-693-3p	NM_181414	Pik3c3	((((((((((((((((((((...&))))).)))...))))...)))))))).	2908	2936	1	-22.2	1	0.000205042	0.544	0.514017	0.0429677	-3.93757	20	28	8	3UTR		0	0
mmu-miR-505-5p	NM_181414	Pik3c3	..((((((((..((...((((..&))))...)).)))))))).	2764	2783	1	-19.8	1	0.0185122	0.529	0.167323	1.32023	-12.0971	14	19	8	3UTR		0	0
mmu-miR-882	NM_181414	Pik3c3	......(((((((.(((((((.&)))))))))))))).	2768	2783	1	-19.1	0	0.0185122	0.529	0.455161	1.6423	-16.4234	14	15	14	3UTR		0	0
mmu-miR-193b-5p	NM_181414	Pik3c3	((((((((((.(((.(((((((&)))))))...))))))))))))).	2953	2977	1	-21.8	1	0.00187955	0.559	0.595483	0.209299	-7.4978	20	24	13	3UTR		0	0
mmu-miR-327	NM_181414	Pik3c3	..(((((((((((.(((((&))))).))))))..))))).	2765	2785	1	-21.5	1	0.0228158	0.515	0.218986	1.4889	-5.81384	16	20	6	3UTR		0	0
mmu-miR-877-5p	NM_181414	Pik3c3	(((.((((.(((((.((((.&)))).)))..)).))))))).	2871	2892	1	-20.8	1	0.000196304	0.456	-0.102525	0.329457	-8.76144	16	21	7	3UTR		0	0
mmu-miR-1900	NM_181414	Pik3c3	((.((((((((((..(((((..&))))))))))))))).)).	2838	2857	1	-26.5	1	0.0183658	0.529	0.293252	0.238158	-7.0874	17	19	15	3UTR		0	0
mmu-miR-1943-5p	NM_181414	Pik3c3	.(((.(.(((((((((((((...&))))))))))).......)).).))).	2848	2875	1	-25.3	1	0.0014964	0.471	0.0854685	0.274363	-9.45605	17	27	11	3UTR		0	0
mmu-miR-3090-3p	NM_181414	Pik3c3	.(((((((((((((((..((..&))..))))))))...............))))))).	2843	2878	1	-25.8	1	5.99699e-05	0.485	0.115552	0.348346	-3.79332	17	35	8	3UTR		0	0
mmu-miR-3473b	NM_181414	Pik3c3	(((((((((((.((((....&))))...)))...)))))))).	2893	2915	1	-23.7	1	0.0106745	0.5	0.407188	0.142137	-7.28438	15	22	8	3UTR		0	0
mmu-miR-5134-3p	NM_181414	Pik3c3	..(((((((.((((.(((((((&))))))).))))..))))))).	2934	2956	1	-25.3	1	0.000218492	0.529	0.605077	0.286956	-6.93496	18	22	7	3UTR		0	0
mmu-miR-344i	NM_181414	Pik3c3	.((((((((..(.((.(((.&))).)).)..)))))))).	2763	2782	1	-21	1	0.0183501	0.544	0.246029	1.34921	-9.38279	14	19	8	3UTR		0	0
mmu-miR-6340	NM_181414	Pik3c3	(((.((((((((((.........&)))))))))).))).	2928	2943	1	-22.5	1	8.8083e-05	0.544	0.767585	0.170996	-7.9381	13	15	10	3UTR		0	0
mmu-miR-6360	NM_181414	Pik3c3	..(((((((.((((((.(((((&))))).))))))))..........))))).	2766	2796	1	-23.5	1	0.00174103	0.544	0.475972	1.03764	-6.19951	18	30	8	3UTR		0	0
mmu-miR-6360	NM_181414	Pik3c3	.((((((((((..(((((((..&))))))).....)))))).)))).	2931	2955	1	-22.6	1	0.00016628	0.529	-0.649308	0.402391	-8.42926	17	24	7	3UTR		0	0
mmu-miR-6387	NM_181414	Pik3c3	.(.(.(((((((.(((((((..&))))))).))))))).).).	2791	2811	1	-22	1	0.000237532	0.588	0.683033	0.499986	-10.759	16	20	7	3UTR		0	0
mmu-miR-6395	NM_181414	Pik3c3	((((((((((((.((.(((((.&.))))).)).))))))))...)))).	2820	2859	1	-26.9	1	0.0238769	0.515	0.366012	0.166798	-5.45975	19	26	8	3UTR		0	0
mmu-miR-6405	NM_181414	Pik3c3	((((((((((((((.(.((((..&.)))).).)))))))))........))))).	2870	2917	1	-28.1	1	0.00599558	0.515	-0.0158466	0.257047	-4.67302	19	31	9	3UTR		0	0
mmu-miR-6410	NM_181414	Pik3c3	((((((((.(((((((((((((&.))..))))))))))).))......................))).))).	2910	2984	1	-24.2	1	9.22052e-05	0.544	0.54511	0.133742	-4.99396	21	49	11	3UTR		0	0
mmu-miR-6413	NM_181414	Pik3c3	(((((((((((.....(((((&))))).......))))))))))).	3020	3044	1	-20	1	0.000521409	0.618	0.132978	0.176243	-10.3988	16	24	11	3UTR		0	0
mmu-miR-378d	NM_181414	Pik3c3	.(((((((.(((((((......&))))))).))))))).	3029	3045	1	-21.4	1	0.000562474	0.618	0.179316	0.208774	-4.84971	14	16	7	3UTR		0	0
mmu-miR-3473e	NM_181414	Pik3c3	(((((((((((.((((..(((&)))..))))...)))...)))))))).	2888	2915	1	-24.7	1	0.0106745	0.5	0.407188	0.142137	-7.28438	18	27	8	3UTR		0	0
mmu-miR-6904-5p	NM_181414	Pik3c3	((((((((((((((.(((((((&))))))).))))))))))).......))).	2949	2979	1	-25.1	1	0.000247428	0.559	0.525121	0.290628	-4.67302	21	30	11	3UTR		0	0
mmu-miR-6907-5p	NM_181414	Pik3c3	....(((((((((((((((.((&)).))))...))))))))))).	2867	2889	1	-23.1	1	7.93787e-06	0.456	0.183647	0.445941	-9.54656	17	22	11	3UTR		0	0
mmu-miR-6916-5p	NM_181414	Pik3c3	..((((..(((((((((((..&))))))))))).)))).	2951	2968	1	-20.9	1	0.028636	0.5	0.00704961	0.400816	-8.81432	15	17	11	3UTR		0	0
mmu-miR-6919-5p	NM_181414	Pik3c3	..((((.((((((.((((((((.&))))))))...)))))).)))).	2960	2983	1	-23.6	1	0.000143062	0.559	0.566098	0.269116	-7.35753	18	23	8	3UTR		0	0
mmu-miR-6922-3p	NM_181414	Pik3c3	..(((((..(((((.((((....&.)))))))))..))))).	2809	2861	1	-21.1	1	0.0142159	0.515	-0.0929308	0.250751	-9.06247	14	18	9	3UTR		0	0
mmu-miR-6955-5p	NM_181414	Pik3c3	.(((((..(((..(((((((((.(&).)))..))))))..)))))))).	2759	2783	1	-23.4	1	0.0185122	0.529	-0.0959837	1.88974	-12.2866	18	24	8	3UTR		0	0
mmu-miR-6978-3p	NM_181414	Pik3c3	..(((((((((((((((((.(((&))).))).......)))).))))))...........)))).	2973	3014	1	-22.8	1	0.00211824	0.515	0.29675	0.130069	-4.957	20	41	6	3UTR		0	0
mmu-miR-6985-5p	NM_181414	Pik3c3	..((((.((((((((.......&)))))))))))).	3009	3022	1	-21.8	1	0.0100131	0.574	0.172569	0.258097	-6.73374	12	13	12	3UTR		0	0
mmu-miR-7000-5p	NM_181414	Pik3c3	..(((.((((((((.(((....&))).)))))))).))).	2766	2783	1	-20.2	1	0.0185122	0.529	0.371958	1.52038	-7.59341	14	17	8	3UTR		0	0
mmu-miR-7001-5p	NM_181414	Pik3c3	.(((.((((.((((((((.((((&))))))).))))).)))).))).	2891	2914	1	-23.3	1	0.00647302	0.5	0.0973629	0.153156	-9.15487	19	23	7	3UTR		0	0
mmu-miR-7015-5p	NM_181414	Pik3c3	((((((((((((.(((((((((.&))))))))).............)))))))..))))).	2909	2946	1	-26.8	1	2.27734e-05	0.529	0.437171	0.277511	-5.22671	21	37	9	3UTR		0	0
mmu-miR-7020-3p	NM_181414	Pik3c3	.(((((((((((((.......&))))))))))).)).	2840	2855	1	-20.5	1	0.0147795	0.529	0.11935	0.253899	-4.76182	13	15	11	3UTR		0	0
mmu-miR-7026-5p	NM_181414	Pik3c3	...((((((((.((((((...&)))))).)).)))))).	3123	3140	1	-19.6	1	0.00184079	0.759	0	0	-9.86134	14	17	6	3UTR		0	0
mmu-miR-7031-3p	NM_181414	Pik3c3	.((((((((..(((.......&)))..)))))))).	2839	2853	1	-17.7	1	0.022962	0.544	0.209299	0.227664	-8.8291	11	14	8	3UTR		0	0
mmu-miR-7035-5p	NM_181414	Pik3c3	(((((((((((((((......&)))))).)))....)))))).	2893	2914	1	-23.1	1	0.00647302	0.5	0.310043	0.180965	-4.17062	15	21	6	3UTR		0	0
mmu-miR-7066-5p	NM_181414	Pik3c3	(((((((((...(((((((.((&.)).)))))))..))))))))).	2871	2916	1	-23.2	1	0.00832899	0.515	-0.0425591	0.354643	-11.3517	18	23	9	3UTR		0	0
mmu-miR-7068-5p	NM_181414	Pik3c3	.((((((((((...(((((((&))))))))))))))))).	3122	3140	1	-23.7	1	0.00184079	0.759	0	0	-9.2861	17	18	17	3UTR		0	0
mmu-miR-7079-5p	NM_181414	Pik3c3	.((((((((((((((.((....&)))))))))).....)))))).	2893	2915	1	-23.3	1	0.0106745	0.5	0.315345	0.138464	-4.02637	16	22	10	3UTR		0	0
mmu-miR-7083-5p	NM_181414	Pik3c3	...((((((((.((((((...&.))))))...)))))))).	2886	2915	1	-25.2	1	0.0106745	0.5	0.0623826	0.159452	-9.86134	14	19	8	3UTR		0	0
mmu-miR-7088-5p	NM_181414	Pik3c3	((.((((((.(((((((.(.(((..&))).).)))))))..)))))))).	2878	2902	1	-24.3	1	0.00171244	0.485	0.0893666	0.365661	-6.73762	19	24	8	3UTR		0	0
mmu-miR-7091-3p	NM_181414	Pik3c3	.((((((((((((.(((((..&))))).))....)))))))))).	2843	2866	1	-21.1	1	0.00619571	0.5	-0.0451829	0.282233	-4.65016	17	23	10	3UTR		0	0
mmu-miR-7094-1-5p	NM_181414	Pik3c3	..((..(((((((((((((((..&))))))))))))))).)).	2874	2893	1	-21.7	1	0.00100822	0.456	0.0134094	0.397144	-10.977	17	19	15	3UTR		0	0
mmu-miR-7094b-2-5p	NM_181414	Pik3c3	.((((((((((((((((((((..&.))))))))))))))).................))))).	2866	2912	1	-25.2	1	0.00852378	0.5	0.0164349	0.31529	-3.79332	20	39	15	3UTR		0	0
mmu-miR-7221-3p	NM_181414	Pik3c3	...((((((((((((......&.)))))))))))).	2900	2919	1	-25.1	1	0.0012032	0.515	0.44017	0.156829	-6.74759	12	14	12	3UTR		0	0
mmu-miR-7225-3p	NM_181414	Pik3c3	(((((.((((.(((((......&))))).)))).))))).	2845	2862	1	-21	1	0.0155553	0.5	0.0833693	0.182539	-8.66331	14	17	5	3UTR		0	0
mmu-miR-7226-5p	NM_181414	Pik3c3	(((..(((((((.((((((((.((((&))))....))))))))))))))).))).	3014	3042	1	-20.8	1	0.000602351	0.618	0.167322	0.218744	-12.3778	22	28	15	3UTR		0	0
mmu-miR-7652-5p	NM_181414	Pik3c3	(((((((((((((..(((((((&)))))))))))))))))))).	2870	2891	1	-26.4	1	3.48769e-06	0.441	0.00910415	0.407113	-5.52986	20	21	20	3UTR		0	0
mmu-miR-7667-3p	NM_181414	Pik3c3	((((((.((((((..(((((..&)))))....)))))))))))).	2868	2890	1	-23.3	1	5.69652e-06	0.456	-0.105524	0.304796	-7.07355	17	22	12	3UTR		0	0
mmu-miR-3620-5p	NM_181414	Pik3c3	((((((((((((.....(((((&)))))...)))))))))))).	2898	2919	1	-28.6	1	0.0012032	0.515	0.377205	0.114852	-7.05204	17	21	12	3UTR		0	0
mmu-miR-12188-5p	NM_181414	Pik3c3	.....((..(((.(((((((((((&))))))))))).)))..)).	3034	3054	1	-23.3	0	0.00069457	0.662	0.0184972	0.237108	-18.3248	16	20	11	3UTR		0	0
Based on these five differential genes, the miRNAs were predicted and their details were summarized in the table.
